# Supplementary material for: Fluorescence umpolung enables light-up sensing of N-acetyltransferases and nerve agents
Source: Research Square preprint supplement (doi:10.21203/rs.3.rs-130366/v1), 2021-01-12
Supplement: Supplementary file 1 [file 4afaa14a4c81d54fcb0d100a.docx]

**Fluorescence umpolung enables light-up sensing of *N*-acetyltransferases andnerve agents**

**Chenxu Yan1, Zhiqian Guo1, Weijie Chi2, Wei Fu1, Xiaogang Liu2, He Tian1 and Wei-Hong Zhu1***

1Key Laboratory for Advanced Materials and Joint International Research Laboratory of Precision Chemistry and Molecular Engineering, Shanghai Key Laboratory of Functional Materials Chemistry, Frontiers Science Center for Materiobiology and Dynamic Chemistry, Institute of Fine Chemicals, School of Chemistry and Molecular Engineering, East China University of Science & Technology, Shanghai 200237 (China).

2Fluorescence Research Group, Singapore University of Technology and Design, Singapore 487372, Singapore.

*e-mail: [whzhu@ecust.edu.cn](mailto:whzhu@ecust.edu.cn)

**Table of Contents**

[1. Experimental section S3](#_Toc55991983)

[1.1 Materials and general methods S3](#_Toc55991984)

[1.2 Theoretical calculation details S3](#_Toc55991985)

[1.3 Cell lines S3](#_Toc55991986)

[1.4 Cellular imaging S3](#_Toc55991987)

[1.5 Animals S4](#_Toc55991988)

[1.6 Synthesis of indazole-based fluorophores S5](#_Toc55991989)

[1.7 References S15](#_Toc55991990)

[2. Fluorescence spectra of indazole-based fluorophores S16](#_Toc55991991)

[3. Crystal information of **IN-NH2**, **IN-Boc**, **IN1-NH2**, **DC-IN-NH2**, **DC-IN-Boc**, and **DCM-IN-NH2** S17](#_Toc55991992)

[4. Quantum chemical calculations for elucidating the unusual fluorescence umpolung mechanism S24](#_Toc55991993)

[5. ESI-MS spectra characterization of **Lighter EW Tracker** reaction with NAT2 mimic S25](#_Toc55991994)

[6. Quantitative and light-up detection of DCP S26](#_Toc55991995)

[7. ESI-MS spectra characterization of **Lighter EW Tracker** reaction with DCP S27](#_Toc55991996)

[8. Intracellular localization of **Lighter EW Tracker** S28](#_Toc55991997)

[9. Characterization of indazole-based fluorophores S29](#_Toc55991998)

# 1. Experimental section

## 1.1 Materials and general methods

Unless specially stated, all solvents and chemicals were purchased from commercial suppliers in analytical grade and used without further purification. The 1H and 13C NMR spectra were recorded on a Bruker AM 400 spectrometer using TMS as an internal standard. The high-resolution mass spectrometry data were obtained with a Waters LCT Premier XE spectrometer. The single-crystal data were obtained with a Bruker D8 Venture X-Ray Diffractometer. UV-vis absorption spectra were collected on a Varian Cary 500 spectrophotometer, and fluorescence spectrum measurements were performed on a Varian Cary Eclipse fluorescence spectrophotometer. Confocal fluorescence images were taken on a Leica TCS SP8 (63 × oil lens).

## 1.2 Theoretical calculation details

All calculations were carried out using Gaussian 16 A.1 Density functional theory (DFT) and time-dependent DFT (TD-DFT) were employed to investigate the fluorescence (quenching) mechanism of all compounds. All structural optimizations in the ground and excited states were performed using M06-2X functional2 and Def2-SVP basis set.3 Solvation effects in dimethyl sulfoxide (DMSO) were taken into account using the SMD model.4 Frequency calculations were performed to confirm that we obtained stable structures without imaginary vibrational frequencies.

The potential energy surface (PES) in the first excited state (S1) was calculated at the same level (M06-2X/Def2-SVP) using relaxed scans with the corrected Linear Response (cLR) solvent formalism around the bond connecting the indazole to the furan moieties.

## 1.3 Cell lines

The cell lines were purchased from the Institute of Cell Biology (Shanghai, China). All cells were propagated in T-75 flasks cultured at 37 ºC under a humidified 5% CO2 atmosphere in RPMI-1640 medium or DMEM medium (GIBCO/Invitrogen, Camarillo, CA, USA) which were supplemented with 10 % fetal bovine serum (FBS, Biological Industry, Kibbutz Beit Haemek, Israel) and 1% penicillin-streptomycin (10,000U mL-1 penicillin and 10 mg mL-1 streptomycin, Solarbio life science, Beijing, China).

## 1.4 Cellular imaging

The cells at 1 × 105 cells/well were seeded onto glass-bottom petri dishes with complete medium (1.5 mL) for 12 h. Then the cells were exposed to desired concentrations of fluorophores for 2 h. PBS was used to wash cells for three times to clean the background. The cells were rinsed with PBS twice. The images were then photographed by using a confocal laser scanning microscope Leica TCS SP8 (63 × oil lens).

## 1.5 Animals

All animal studies were approved by the Animal Care and Use Committee in accordance with the guidelines for the care and use of laboratory animals. The 3-4-week-old female BALB/cA nude mice were purchased from Shanghai Genechem Co. Ltd. and maintained under standard conditions. The animals were housed in sterile cages within laminar airflow hoods in a specific pathogen-free room with a 12-h light/12-h dark schedule and fed autoclaved chow and water *ad* libitum. Production Permit No.: SCXK (Shanghai) 2013-0017. SYXK No. of Shanghai Institute of Materia Medica: SYXK (Shanghai) 2013-0049.

## 1.6 Synthesis of indazole-based fluorophores

The compounds **DCM**, **DCM-Ac**, and **DCM-NH2** were synthesized by the established procedures from our reported works.5

**Supplementary Fig. 1.** Synthetic route of **IN-Ac**, **DCM-SIN-NH2**, **DC-IN-Ac**, and **DCM-IN-NH2**

**Supplementary Fig. 2.** Synthetic route of **DCM-IN1-NH2** and **DCM-NH2**

**Synthesis of IN-NO2**

**I-NO2** (1.00 g, 6.13 mmol) and KOH (3.36 g, 60.10 mmol) were dissolved in water (10 mL) under an argon atmosphere at room temperature. Then Me2SO4 (3.50 g, 27.80 mmol) was added dropwise. The mixture was refluxed for 1 h under an argon atmosphere. The solution was filtered and the residue was purified by silica gel chromatography (CH2Cl2:PE = 1:1) to get the desired product **IN-NO2** (300 mg). Yield was 28%. 1H NMR (400 MHz, DMSO-*d*6, ppm): *δ* 4.25 (s, 3H, NC*H*3-H), 7.77 (d, *J* = 8.0 Hz, 1H, phenyl-H), 8.00 (dd, *J* = 8.0 Hz, 1H, phenyl-H), 8.77 (s, 1H, imidazole-H), 8.88 (d, *J* = 4.0 Hz, 1H, phenyl-H). 13C NMR (100 MHz,CDCl3, ppm): *δ* 150.02, 143.08, 127.77, 120.40, 120.25, 119.22, 118.19, 40.96. Mass spectrometry (ESI-MS, m/z): [M + H]+ calcd. for [C8H7N3O2 + H]+ 178.0629; found 178.0629.

**Synthesis of IN-NH2**

**IN-NO2** (100 mg, 0.56 mmol), iron powder (110 mg, 2.00 mmol), and NH4Cl (75 mg, 1.41 mmol) were dissolved in mixture of methanol and water (16 mL, v:v = 3:1) under an argon atmosphere at room temperature. Then the mixture was refluxed for 4 h under an argon atmosphere. The solution was added to ethyl acetate (20 mL) and washed with deionized H2O (5 mL × 5). The organic layer was dried over anhydrous Na2SO4, filtered and concentrated by evaporation. The residue was purified by silica gel chromatography (CH2Cl2) to get the product **IN-NH2** (70 mg). Yield was 84%.1H NMR (400 MHz, CDCl3, ppm): *δ* 4.14 (s, 3H, NC*H*3-H), 6.75 (m, 1H, phenyl-H), 6.81 (dd, *J* = 8.0 Hz, 4.0 Hz, 1H, phenyl-H), 7.53(d, *J* = 8.8 Hz, 1H, phenyl-H), 7.62 (s, 1H, imidazole-H). 13C NMR (100 MHz,CDCl3, ppm): *δ* 145.50, 140.55, 122.82, 121.33, 120.42, 118.29, 99.70, 40.09. Mass spectrometry (ESI-MS, m/z): [M + H]+ calcd. for [C8H9N3 + H]+ 148.0875; found 148.0871.

**Synthesis of IN-Boc**

**IN-NH2** (200 mg, 1.36 mmol) was dissolved in THF (5 mL) under an argon atmosphere at room temperature. Then (Boc)2O (296 mg, 1.36 mmol, mixed with 10 mL of THF) was added dropwise. Then the mixture was stirred overnight at room temperature. The solution was added to CH2Cl2 (20 mL) and washed with deionized H2O (20 mL × 5). The organic layer was dried over anhydrous Na2SO4, filtered and concentrated by evaporation. The residue was purified by silica gel chromatography (CH2Cl2:PE = 1:1) to get desired product **IN-Boc** (235 mg). Yield was 70%. 1H NMR (400 MHz, CDCl3, ppm): *δ* 1.53 (s, 9H, -(C*H*3)3), 4.19 (s, 3H, NC*H*3-H), 6.45 (s, 1H, imidazole-H), 7.00 (dd, *J* = 8.0 Hz, 1H, phenyl-H), 7.61 (d, *J* = 8.0 Hz, 1H, phenyl-H), 7.79 (s, 1H, phenyl-H), 7.89 (s, 1H, amide-H). 13C NMR (100 MHz,CDCl3, ppm): *δ* 153.22, 146.46, 132.04, 123.32, 122.14, 121.13, 111.87, 107.32, 80.30, 40.26, 28.39. Mass spectrometry (ESI-MS, m/z): [M + Na]+ calcd. for [C13H17N3O2 + Na]+ 270.1218; found 270.1222.

**Synthesis of IN-Ac**

**IN-NH2** (200 mg, 1.36 mmol) was dissolved in CH2Cl2 (5 mL) under an argon atmosphere at room temperature. Then (CH3CO)2O (0.5 mL) was added dropwise. Then the mixture was stirred overnight at room temperature. The solution was added to CH2Cl2 (20 mL) and washed with deionized H2O (20 mL × 5). The organic layer was dried over anhydrous Na2SO4, filtered and concentrated by evaporation. The residue was purified by silica gel chromatography (CH2Cl2:MeOH = 100:1) to get desired product **IN-Ac** (192 mg). Yield was 75%. 1H NMR (400 MHz, CDCl3, ppm): *δ* 2.20 (s, 3H, -C*H*3), 4.19 (s, 3H, NC*H*3-H), 7.04 (dd, *J* = 9.2 Hz, 1H, phenyl-H), 7.34 (s, 1H, amide-H), 7.62 (d, *J* = 9.2 Hz, 1H, phenyl-H), 7.83 (s, 1H, imidazole-H), 8.14 (s, 1H, phenyl-H). 13C NMR (100 MHz,CDCl3, ppm): *δ* 168.43, 146.75, 131.53, 123.83, 121.96, 121.41, 117.94, 109.67, 10.33, 24.59. Mass spectrometry (ESI-MS, m/z): [M + H]+ calcd. for [C13H17N3O2 + H]+ 190.0980; found 190.0978.

**Synthesis of AL-SIN-Boc**

**IN-Boc** (400 mg, 1.62 mmol), Cu(OAc)2 H2O (486 mg, 2.43 mmol), thiophene-2-carbaldehyde (544 mg, 4.86 mmol), pyridine (0.2 mL), and Pd(PPh3)4 (94 mg, 0.08 mmol) were dissolved in 1,4-dioxane (4 mL) under an argon atmosphere at room temperature. Then the mixture was refluxed for 24 h under an argon atmosphere. The solution was filtered and concentrated by evaporation. The residue was purified by silica gel chromatography (CH2Cl2) to get the product **AL-SIN-Boc** (252 mg). Yield was 44%. 1H NMR (400 MHz, CDCl3, ppm): *δ* 1.53 (s, 9H, -(C***H***3)3), 4.32 (s, 3H, NC*H*3-H), 6.63 (s, 1H, phenyl-H), 7.11 (dd, 1H, phenyl-H), 7.44 (d, *J* = 4.0 Hz, 1H, furan-H), 7.65 (d, *J* = 8.0 Hz, 1H, phenyl-H), 7.88 (d, *J* = 4.0 Hz, 1H, furan-H), 8.01 (s, 1H, amide-H), 9.98 (s, 1H, C*H*O-H). Mass spectrometry (ESI-MS, m/z): [M + H]+ calcd. for [C18H19N3O3S + H]+ 358.1225; found 358.1233.

**Synthesis of DCM-SIN-Boc**

**AL-SIN-Boc** (89 mg, 0.25 mmol), DCM (52 mg, 0.25 mmol), piperidine (0.2 mL), and acetic acid (0.1 mL) were dissolved in toluene (10 mL) under an argon atmosphere at room temperature. Then the mixture was refluxed for 6 h under an argon atmosphere. The solution was concentrated by evaporation. The residue was purified by silica gel chromatography (CH2Cl2) to get the product **DCM-SIN-Boc** (28 mg). Yield was 20%. 1H NMR (400 MHz, DMSO-*d*6, ppm): *δ* 1.49 (s, 9H, -(C***H***3)3), *δ=* 4.26 (s, 3H, NC*H*3-H), 7.15 (s, 1H, phenyl-H), 7.30 (dd, *J* = 8.0 Hz, 1H, phenyl-H), 7.37 (d, *J* = 16.0 Hz, 1H, alkene-H), 7.58 (d, *J* = 4.0 Hz, 1H, thiophene-H), 7.59 (d, *J* = 8.0 Hz, 1H, phenyl-H), *δ=* 7.64 (t, *J* = 4.0 Hz, 1H, phenyl-H), 7.77 (d, *J* = 4.0 Hz, 1H, thiophene-H), 7.81 (d, *J* = 8.0 Hz, 1H, phenyl-H), 7.94 (t, *J* = 8.0 Hz, 1H, phenyl-H), 8.02 (d, *J* = 16.0 Hz, 1H, alkene-H), 8.14 (s, 1H, phenyl-H), 8.74 (dd, *J* = 8.0 Hz, 1H, phenyl-H), 9.42 (s, 1H, amide-H). Mass spectrometry (ESI-MS, m/z): [M + Na]+ calcd. for [C31H25N5O3S + Na]+ 548.1756; found 548.1754.

**Synthesis of DCM-SIN-NH2**

**DCM-SIN-Boc** (20 mg, 0.04 mmol) was dissolved in CH2Cl2 (5 mL) under an argon atmosphere at room temperature. Then trifluoroacetic acid (TFA, 1 mL) was added dropwise. The mixture was stirred overnight at room temperature. The solution was concentrated by evaporation. The residue was purified by silica gel chromatography (CH2Cl2:EtOAc = 6:1) to get desired product **DCM-SIN-NH2** (10 mg). Yield was 56%. 1H NMR (400 MHz, DMSO-*d*6, ppm): *δ* 4.23 (s, 3H, NC*H*3-H), 5.21 (s, 2H, N*H*2-H), 6.85 (m, 2H, phenyl-H), 7.12 (s, 1H, phenyl-H), 7.28 (d, *J* = 16.0 Hz, 1H, alkene-H), 7.42 (d, *J* = 8.0 Hz, 1H, phenyl-H), 7.51 (d, *J* = 4.0 Hz, 1H, thiophene-H), 7.62 (t, *J* = 8.0 Hz, 1H, phenyl-H), 7.70 (d, *J* = 4.0 Hz, 1H, thiophene-H), 7.79 (d, *J* = 8.0 Hz, 1H, phenyl-H), 7.94 (t, *J* = 8.0 Hz, 1H, phenyl-H), 8.00 (d, *J* = 16.0 Hz, 1H, phenyl-H), 8.74 (d, *J* = 8.0 Hz, 1H, phenyl-H). Mass spectrometry (ESI-MS, m/z): [M + H]+ calcd. for [C26H17N5OS + H]+ 448.1232; found 448.1230.

**Synthesis of AL-IN-Boc**

**IN-Boc** (200 mg, 0.81 mmol), Cu(OAc)2 H2O (242 mg, 1.20 mmol), furan-2-carbaldehyde (233 mg, 2.43 mmol), pyridine (0.2 mL), and Pd(PPh3)4 (47 mg, 0.04 mmol) were dissolved in 1,4-dioxane (4 mL) under an argon atmosphere at room temperature. Then the mixture was refluxed for 24 h under an argon atmosphere. The solution was filtered and concentrated by evaporation. The residue was purified by silica gel chromatography (CH2Cl2:PE = 1:1) to get the product **AL-IN-Boc** (65 mg). Yield was 41%. 1H NMR (400 MHz, CDCl3, ppm): *δ* 1.55 (s, 9H, -(C***H***3)3), 4.46 (s, 3H, NC*H*3-H), 6.63 (s, 1H, furan-H), 7.01 (d, *J* = 4.0 Hz, 1H, furan-H), 7.15 (dd, *J* = 8.0 Hz, 4.0 Hz, 1H, phenyl-H), 7.43 (d, *J* = 4.0 Hz, 1H, phenyl-H), 7.66 (s, 1H, phenyl-H), 8.11 (s, 1H, amide-H), 9.72 (s, 1H, C*H*O-H). 13C NMR (100 MHz, CDCl3, ppm): *δ* 176.90, 153.00, 151.88, 149.83, 145.19, 134.42, 132.85, 132.05, 128.47, 124.22, 121.84, 118.63, 110.49, 80.67, 40.91, 28.38. Mass spectrometry (ESI-MS, m/z): [M + H]+ calcd. for [C18H19N3O4 + H]+ 342.1454; found 342.1458.

**Synthesis of DC-IN-Boc**

**AL-IN-Boc** (100 mg, 0.3 mmol) and malononitrile (28 mg, 0.4 mmol) were dissolved in CHCl3 (5 mL) under an argon atmosphere at room temperature. Then triethylamine (TEA, 0.2 mL) was added dropwise. The mixture was stirred overnight at room temperature. The solution was added to CH2Cl2 (20 mL) and washed with deionized H2O (20 mL × 5). The organic layer was dried over anhydrous Na2SO4, filtered and concentrated by evaporation. The residue was purified by silica gel chromatography (CH2Cl2:EtOAc = 80:1) to get the desired product **DC-IN-Boc** (100 mg). Yield was 85%. 1H NMR (400 MHz, DMSO-*d*6, ppm): *δ* 1.50 (s, 9H, -(C***H***3)3), 4.42 (s, 3H, NC***H***3-H), 7.30 (d, *J* = 4.0 Hz, 1H, Ph-H), 7.37 (d, *J* = 12.0 Hz, 1H, Ph-H), 7.66 (d, *J* = 12.0 Hz, 1H, Ph-H), 7.72 (d, *J* = 4.0 Hz, 1H, Ph-H), 8.14 (s, 1H, Ph-H), 8.32(s, 1H, Ph-H), 9.44 (s, 1H, amide-H). Mass spectrometry (ESI-MS, m/z): [M + H]+ calcd. for [C26H17N5O2 + H]+ 390.1566; found 390.1566.

**Synthesis of DC-IN-NH2**

**DC-IN-Boc** (161 mg, 0.41 mmol) was dissolved in CH2Cl2 (10 mL) under an argon atmosphere at room temperature. Then trifluoroacetic acid (TFA, 8 mL) was added dropwise. The mixture was stirred overnight at room temperature. The solution was concentrated by evaporation. The residue was purified by silica gel chromatography (CH2Cl2) to get the desired product **DC-IN-NH2** (70 mg). Yield was 59%. 1H NMR (400 MHz, DMSO-*d*6, ppm): *δ* 4.35 (s, 3H, NC***H***3-H), 5.24 (s, 2H, N*H*2-H), 6.88 (d, *J* = 8.0 Hz, 1H, Ph-H), 7.00 (s, 1H, Ph-H), 7.24 (d, *J* = 4.0 Hz, 1H, Ph-H), 7.49 (d, *J* = 8.0 Hz, 1H, Ph-H), 7.68 (d, *J* = 4.0 Hz, 1H, Ph-H), 8.20 (s, 1H, Ph-H). Mass spectrometry (ESI-MS, m/z): [M + H]+ calcd. for [C16H12N5O + H]+ 290.1042; found 290.1042.

**Synthesis of DC-IN-Ac**

**DC-IN-NH2** (40 mg, 0.14 mmol) was dissolved in CH2Cl2 (5 mL) under an argon atmosphere at room temperature. Then (CH3CO)2O (0.5 mL) was added dropwise. Then the mixture was stirred overnight at room temperature. The solution was added to CH2Cl2 (20 mL) and washed with deionized H2O (20 mL × 5). The organic layer was dried over anhydrous Na2SO4, filtered and concentrated by evaporation. The residue was purified by silica gel chromatography (CH2Cl2) to get the desired product **DC-IN-Ac** (18 mg). Yield was 39%. 1H NMR (400 MHz, DMSO-*d*6, ppm): *δ* 2.08 (s, 3H, C***H***3-H), 4.42 (s, 3H, NC***H***3-H), 7.31 (d, *J* = 4.0 Hz, 1H, furan-H), 7.40 (d, *J* = 8.0 Hz, 1H, phenyl-H), 7.69 (s, 1H, phenyl-H), 7.72 (d, *J* = 4.0 Hz, 1H, furan-H), 8.32 (s, 1H, alkene-H), 8.36 (s, 1H, phenyl-H), 10.1(s, 1H, amide-H). Mass spectrometry (ESI-MS, m/z): [M + H]+ calcd. for [C18H13N5O2 + H]+ 332.1147; found 332.1147.

**Synthesis of DCM-IN-Boc**

**AL-IN-Boc** (57 mg, 0.17 mmol), DCM (52 mg, 0.25 mmol), piperidine (0.2 mL), and acetic acid (0.1 mL) were dissolved in Toluene (10 mL) under an argon atmosphere at room temperature. Then the mixture was refluxed for 6 h under an argon atmosphere. The solution was concentrated by evaporation. The residue was purified by silica gel chromatography (CH2Cl2) to get the product **DCM-IN-Boc** (28 mg). Yield was 31%. 1H NMR (400 MHz, DMSO-*d*6, ppm): *δ* 1.51 (s, 9H, -(C***H***3)3), 4.38 (s, 3H, NC*H*3-H), 7.09 (s, 1H, phenyl-H), 7.15 (d, *J* = 4.0 Hz, 1H, furan-H), 7.22 (d, *J* = 16.0 Hz, 1H, alkene-H), 7.28 (d, *J* = 4.0 Hz, 1H, furan-H), 7.44 (d, *J* = 8.0 Hz, 1H, phenyl-H), 7.62 (t, *J* = 8.0 Hz, 2H, phenyl-H), 7.74 (d, *J* = 16 Hz, 1H, alkene-H),7.79 (d, *J* = 8.0 Hz, 1H, phenyl-H), 7.94 (t, *J* = 8.0 Hz, 1H, phenyl-H), 8.23 (s, 1H, phenyl-H), 8.74 (d, *J* = 8.0 Hz, 1H, phenyl-H), 9.47 (s, 1H, amide-H). Mass spectrometry (ESI-MS, m/z): [M + Na]+ calcd. for [C31H25N5O4 + Na]+ 554.1804; found 554.1804.

**Synthesis of DCM-IN-NH2**

**DC-IN-Boc** (20 mg, 0.04 mmol) was dissolved in CH2Cl2 (10 mL) under an argon atmosphere at room temperature. Then trifluoroacetic acid (TFA, 1 mL) was added dropwise. The mixture was stirred overnight at room temperature. The solution was concentrated by evaporation. The residue was purified by silica gel chromatography (CH2Cl2) to get desired product **DCM-IN-NH2** (10 mg). Yield was 59%. 1H NMR (400 MHz, DMSO-*d*6, ppm): *δ* 4.31 (s, 3H, NC*H*3-H), 5.32 (s, 2H, N*H*2-H), 6.86 (d, *J* = 8.0 Hz, 1H, phenyl-H), 7.07 (m, 2H, phenyl-H,furan-H), 7.21 (d, *J* = 16.0 Hz, 1H, alkene-H), 7.23 (s, 1H, phenyl-H), 7.25 (d, *J* = 4.0 Hz, 1H, furan-H)), 7.44 (d, *J* = 8.0 Hz, 1H, phenyl-H), 7.62 (t, *J* = 8.0 Hz, 1H, phenyl-H), 7.71 (d, *J* = 16.0 Hz, 1H, alkene-H),7.89 (d, *J* = 8.0 Hz, 1H, phenyl-H), 7.93 (t, *J* = 8.0 Hz, 1H, phenyl-H),8.74 (d, 1H, *J* = 8.0 Hz, phenyl-H). 13C NMR (100 MHz, DMSO-*d*6, ppm): *δ* 158.06, 152.54, 151.95, 150.30, 148.29, 144.63, 142.52, 135.30, 126.05, 124.65, 124.58, 122.10, 121.71, 120.50, 119.13, 118.89, 118.01, 117.47, 117.06, 116.05, 115.46, 110.35, 106.63, 97.53, 59.43. Mass spectrometry (ESI-MS, m/z): [M + H]+ calcd. for [C26H17N5O2 + H]+ 432.1461; found 432.1461.

**Synthesis of IN1-NO2**

**I1-NO2** (1.00 g, 6.13 mmol) and KOH (3.36 g, 60.1 mmol) were dissolved in water (10 mL) under an argon atmosphere at room temperature. Then Me2SO4 (3.50 g, 27.8 mmol) was added dropwise. The mixture was refluxed for 1 h under an argon atmosphere. The solution was filtered and the residue was purified by silica gel chromatography (CH2Cl2:PE = 1:1) to get the desired product **IN1-NO2** (320 mg). Yield was 29%. 1H NMR (400 MHz, *d*6-DMSO, ppm): *δ* 4.13 (s, 3H, C*H*3-H), 7.86 (d, 1H, *J* = 8.0 Hz, phenyl-H), 8.24 (dd, 1H, *J* = 8.0 Hz, 4.0 Hz, phenyl-H), 8.39 (s, 1H, imidazole-H), 8.84 (d, 1H, *J* = 4.0 Hz, phenyl-H). Mass spectrometry (ESI-MS, m/z): [M + H]+ calcd. for [C8H7N3O2 + H]+ 178.0617; found 178.0631.

**Synthesis of IN1-NH2**

**IN1-NO2** (200 mg, 1.12 mmol), iron powder (220 mg, 4.00 mmol), and NH4Cl (150.6 mg, 2.82 mmol) were dissolved in mixture of methanol and water (16 mL, v:v = 3:1) under an argon atmosphere at room temperature. Then the mixture was refluxed for 4 h under an argon atmosphere. The solution was added to ethyl acetate (20 mL) and washed with deionized H2O (5 mL × 5). The organic layer was dried over anhydrous Na2SO4, filtered and concentrated by evaporation. The residue was purified by silica gel chromatography (CH2Cl2) to get the product **IN1-NH2** (130 mg). Yield was 79%. 1H NMR (400 MHz, CDCl3, ppm): *δ* 3.99 (s, 3H, C*H*3-H), 6.85 (dd, 1H, *J* = 8.0, 4.0 Hz, phenyl-H), 6.90 (s, 1H, phenyl-H), 7.19 (d, *J* = 8.0 Hz, 1H, phenyl-H), 7.76 (s, 1H, imidazole-H). 13C NMR (100 MHz,CDCl3, ppm): *δ* 140.08, 135.67, 131.05, 124.89, 118.45, 109.66, 103.48, 35.58. Mass spectrometry (ESI-MS, m/z): [M + H]+ calcd. for [C8H9N3 + H]+ 148.0875; found 148.0915.

**Synthesis of IN1-Boc**

**IN1-NH2** (400 mg, 2.72 mmol) was dissolved in THF (5 mL) under an argon atmosphere at room temperature. Then (Boc)2O (594 mg, 2.72 mmol, mixed with 10 mL of THF) was added dropwise. Then the mixture was stirred overnight at room temperature. The solution was added to CH2Cl2 (20 mL) and washed with deionized H2O (20 mL × 5). The organic layer was dried over anhydrous Na2SO4, filtered and concentrated by evaporation. The residue was purified by silica gel chromatography (CH2Cl2:PE = 1:1) to get the desired product **IN1-Boc** (500 mg). Yield was 74%. 1H NMR (400 MHz, CDCl3, ppm) *δ=* 1.53 (s, 9H, -(C***H***3)3), *δ=* 4.04 (s, 3H, C*H*3-H), *δ=* 6.60 (s, 1H, phenyl-H), 7.29 (s, 2H, phenyl-H, imidazole-H), 7.81 (s, 1H, phenyl-H), *δ=* 7.88 (s, 1H, amide-H). 13C NMR (100 MHz,CDCl3, ppm): *δ* 153.39, 137.09, 132.41, 131.59, 124.16, 120.48, 110.19, 109.16, 80.39, 35.60, 28.40. Mass spectrometry (ESI-MS, m/z): [M + Na]+ calcd. for [C13H17N3O2 + Na]+ 270.1218; found 270.1211.

**Synthesis of AL-IN1-Boc**

**IN1-Boc** (400 mg, 1.62 mmol), Cu(OAc)2 H2O (486 mg, 2.40 mmol), furan-2-carbaldehyde (466 mg, 4.86 mmol), pyridine (0.2 mL), and Pd(PPh3)4 (94 mg, 0.08 mmol) were dissolved in 1,4-dioxane (4 mL) under an argon atmosphere at room temperature. Then the mixture was refluxed for 24 h under an argon atmosphere. The solution was filtered and concentrated by evaporation. The residue was purified by silica gel chromatography (CH2Cl2:PE = 1:1) to get the product **AL-IN1-Boc** (80 mg). Yield was 14%. 1H NMR (400 MHz, CDCl3, ppm): *δ* 1.55 (s, 9H, -(C***H***3)3), 4.11 (s, 3H, NC*H*3-H), 6.90 (s, 1H, furan-H), 7.04 (d, *J* = 4.0 Hz, 1H, furan-H), 7.35 (d, *J* = 8.0 Hz, 1H, phenyl-H), 7.38 (d, *J* = 4.0 Hz, 1H, phenyl-H), 7.66 (s, 1H, phenyl-H), 8.05 (s, 1H, amide-H), 9.71 (s, 1H, C*H*O-H). 13C NMR (100 MHz, CDCl3, ppm): *δ* 177.20, 154.87, 153.34, 151.81, 138.00, 133.80, 133.66, 123.11, 121.46, 121.20, 110.11, 109.69, 108.43, 80.58, 36.12, 28.38. Mass spectrometry (ESI-MS, m/z): [M + Na]+ calcd. for [C18H19N3O4 + Na]+ 364.1273; found 364.1273.

**Synthesis of DCM-IN1-Boc**

**AL-IN1-Boc** (114 mg, 0.34 mmol), DCM (104 mg, 0.50 mmol), piperidine (0.2 mL), and acetic acid (0.1 mL) were dissolved in Toluene (10 mL) under an argon atmosphere at room temperature. Then the mixture was refluxed for 6 h under an argon atmosphere. The solution was concentrated by evaporation. The residue was purified by silica gel chromatography (CH2Cl2) to get the product **DCM-IN1-Boc** (48 mg). Yield was 27%. 1H NMR (400 MHz, DMSO-*d*6, ppm) *δ* 1.52 (s, 9H, Boc-H), 4.09 (s, 3H, NC*H*3-H), 7.04 (d, *J* = 4.0 Hz, 1H, furan-H), 7.08 (s, 1H, pyran-H), 7.13 (d, *J* = 16.0 Hz, 1H, alkene-H), 7.20 (d, *J* = 4.0 Hz, 1H, furan-H), 7.61 (t, *J* = 8.0 Hz, 2H, phenyl-H), 7.65 (s, 1H, phenyl-H), 7.70 (d, *J* = 16.0 Hz, 1H, alkene-H), 7.76 (d, *J* = 8.0 Hz, 1H, phenyl-H), 7.92 (t, *J* = 8.0 Hz, 1H, phenyl-H), 8.30 (s, 1H, phenyl-H), 8.72 (d, *J* = 8.0 Hz, 1H, phenyl-H), 9.49 (s, 1H, amide-H). Mass spectrometry (ESI-MS, m/z): [M + Na]+ calcd. for [C31H25N5O4 + Na]+ 554.1804; found 554.1797.

**Synthesis of DCM-IN1-NH2**

**DC-IN1-Boc** (40 mg, 0.08 mmol) was dissolved in CH2Cl2 (10 mL) under an argon atmosphere at room temperature. Then trifluoroacetic acid (TFA, 1 mL) was added dropwise. The mixture was stirred overnight at room temperature. The solution was concentrated by evaporation. The residue was purified by silica gel chromatography (CH2Cl2) to get the desired product **DCM-IN1-NH2** (20 mg). Yield was 59%. 1H NMR (400 MHz, CDCl3, ppm): *δ* 4.10 (s, 3H, NC*H*3-H),6.81 (d, *J* = 16.0 Hz,1H, alkene-H), 6.87 (d, *J* = 4.0 Hz, 1H, furan-H), 6.90 (s, 1H, phenyl-H), 6.96 (m, 2H, phenyl-H, furan-H), 7.35 (s, 1H, pyran-H), 7.45 (t, *J* = 8.0 Hz, 2H, phenyl-H), 7.52 (m, 2H, phenyl-H, alkene-H),7.73 (t, *J* = 8.0 Hz, 1H, phenyl-H), 8.93 (d, 1H, *J* = 8.0 Hz, phenyl-H). Mass spectrometry (ESI-MS, m/z): [M + H]+ calcd. for [C26H17N5O2 + H]+ 432.1461; found 432.1461.

## 1.7 References

1. Frisch, M. *et al.* Gaussian 16 Rev. A.03 (*Wallingford, CT*, 2016).
2. Zhao, Y. & Truhlar, D. G. The M06 suite of density functionals for main group thermochemistry, thermochemical kinetics, noncovalent interactions, excited states, and transition elements: two new functionals and systematic testing of four M06-class functionals and 12 other functionals. *Theor. Chem. Acc.* **120**, 215-241 (2008).
3. Weigend, F. & Ahlrichs, R. Balanced basis sets of split valence, triple zeta valence and quadruple zeta valence quality for H to Rn: Design and assessment of accuracy. *Phys. Chem. Chem. Phys.* **7**, 3297-3305 (2005).
4. Marenich, A. V., Cramer, C. J. & Truhlar, D. G. Universal solvation model based on solute electron density and on a continuum model of the solvent defined by the bulk dielectric constant and atomic surface tensions. *J. Phys. Chem. B* **113**, 6378-6396 (2009).
5. Wu, X. *et al.* *In vivo* and *in situ* tracking cancer chemotherapy by highly photostable NIR fluorescent theranostic prodrug. *J. Am. Chem. Soc.* **136**, 3579-3588 (2014).

# 2. Fluorescence spectra of indazole-based fluorophores

**
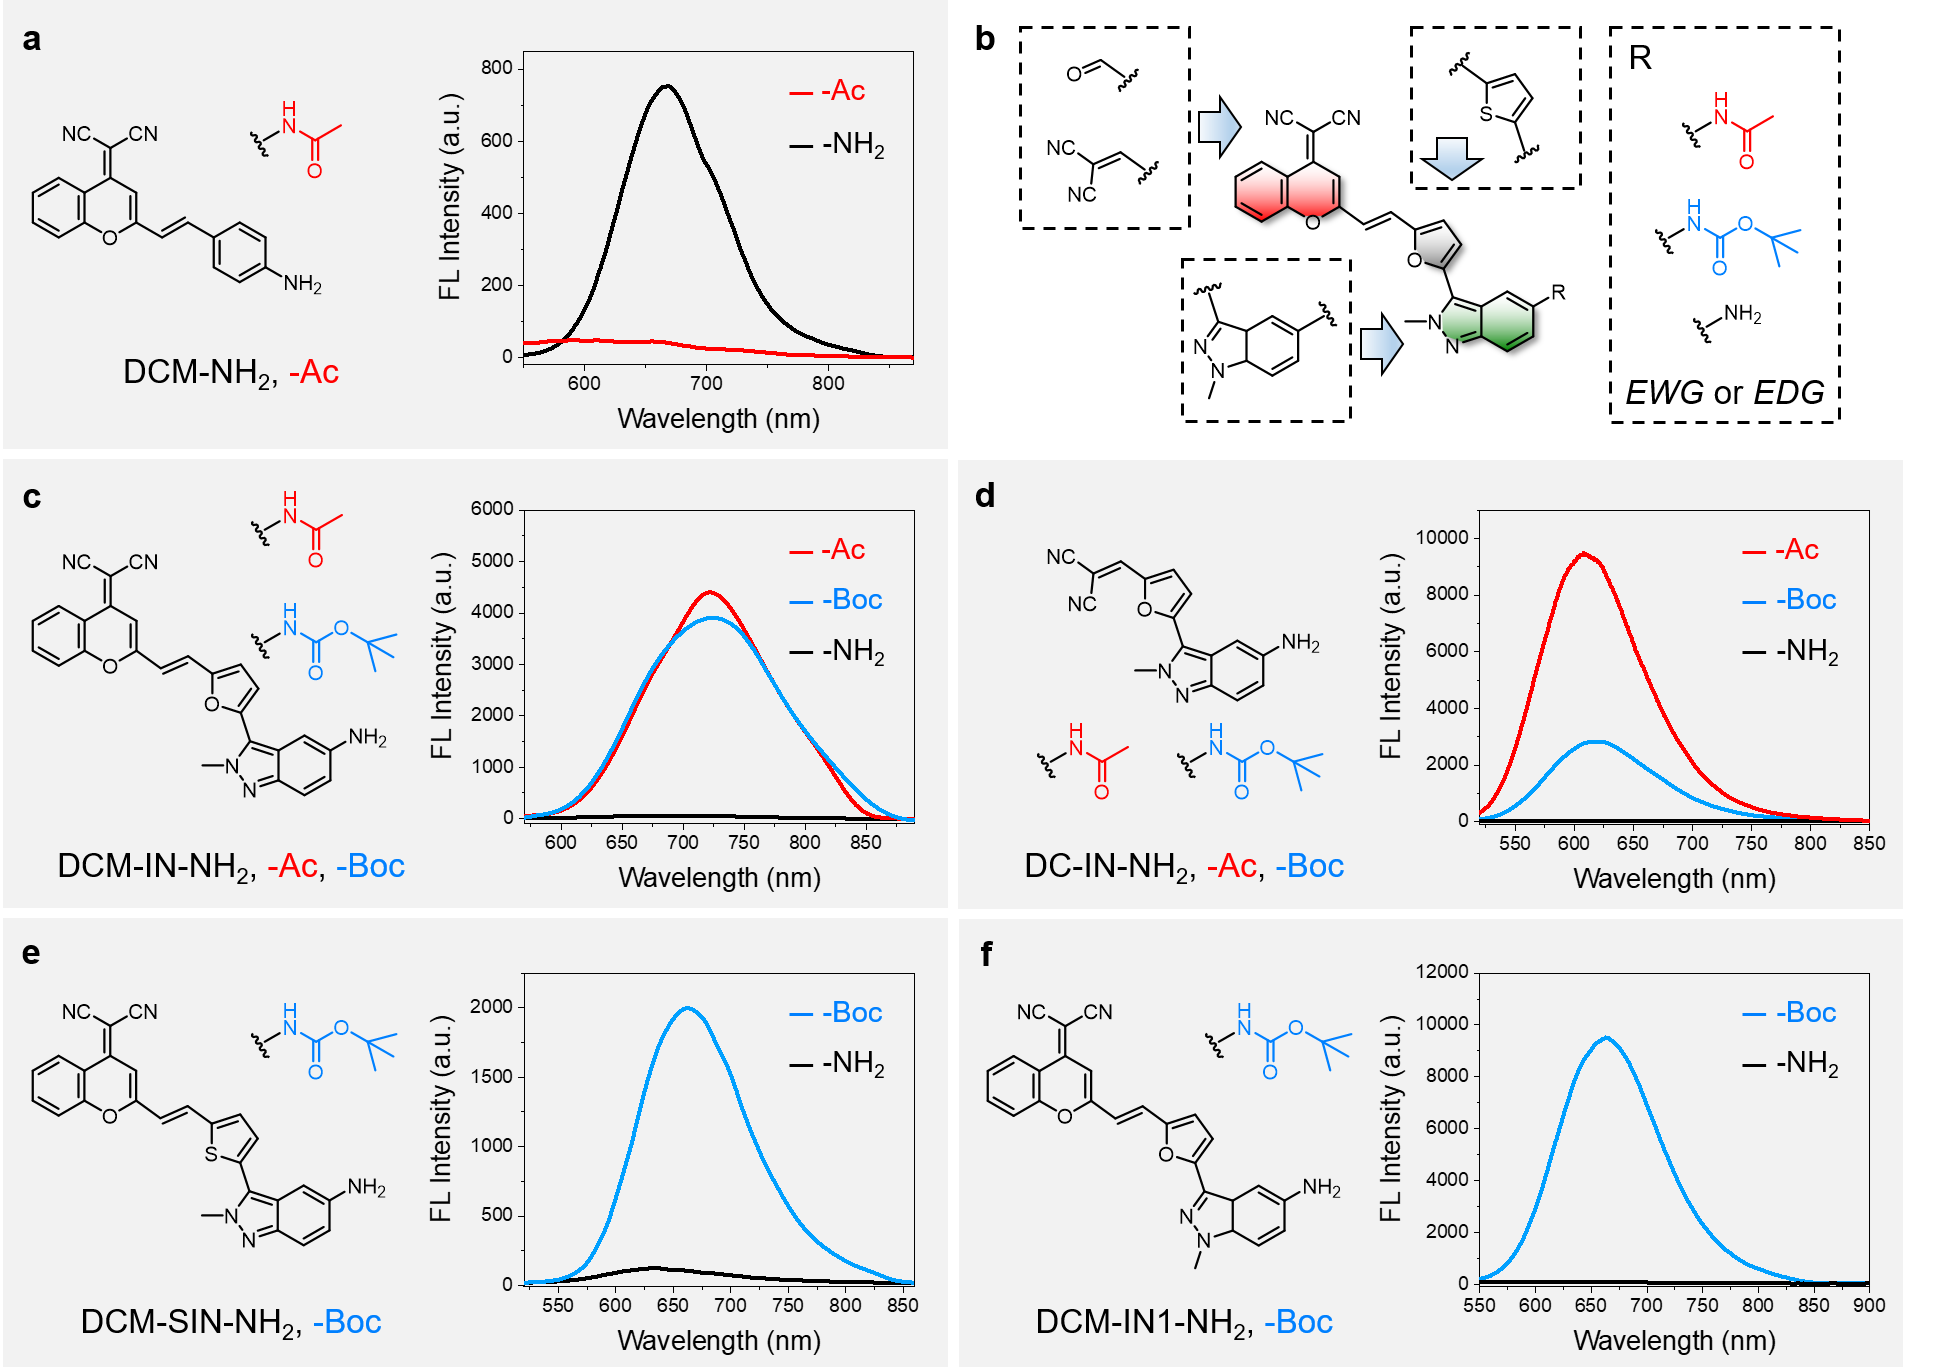
**

**Supplementary Fig. 3.** (**a**) Fluorescence spectra of **DCM-NH2** (traditional ICT fluorophore) and its electron-withdrawing acetyl substituted product **DCM-Ac** in DMSO. (**b-f**) Design of indazole-based fluorophores: (i) start with D-π-A fluorophore as a basis (π-bridge: thiophene or furan; acceptor: DCM, malononitrile, or aldehyde group); (ii) insert an indazole building block (2-methyl-indazole or 1-methyl-indazole) between the π-bridge and the donor. Fluorescence spectra of these indazole-based fluorophores indicated their fluorescence umpolung properties: the D-indazole-π-A type dyes displayed extremely weak emission intensity, whereas their electron-withdrawing Boc substituted products (EWT-indazole-π-A type dyes) exhibited strong fluorescence.

# 3. Crystal information of IN-NH2, IN-Boc, IN1-NH2, DC-IN-NH2, DC-IN-Boc, and DCM-IN-NH2

**
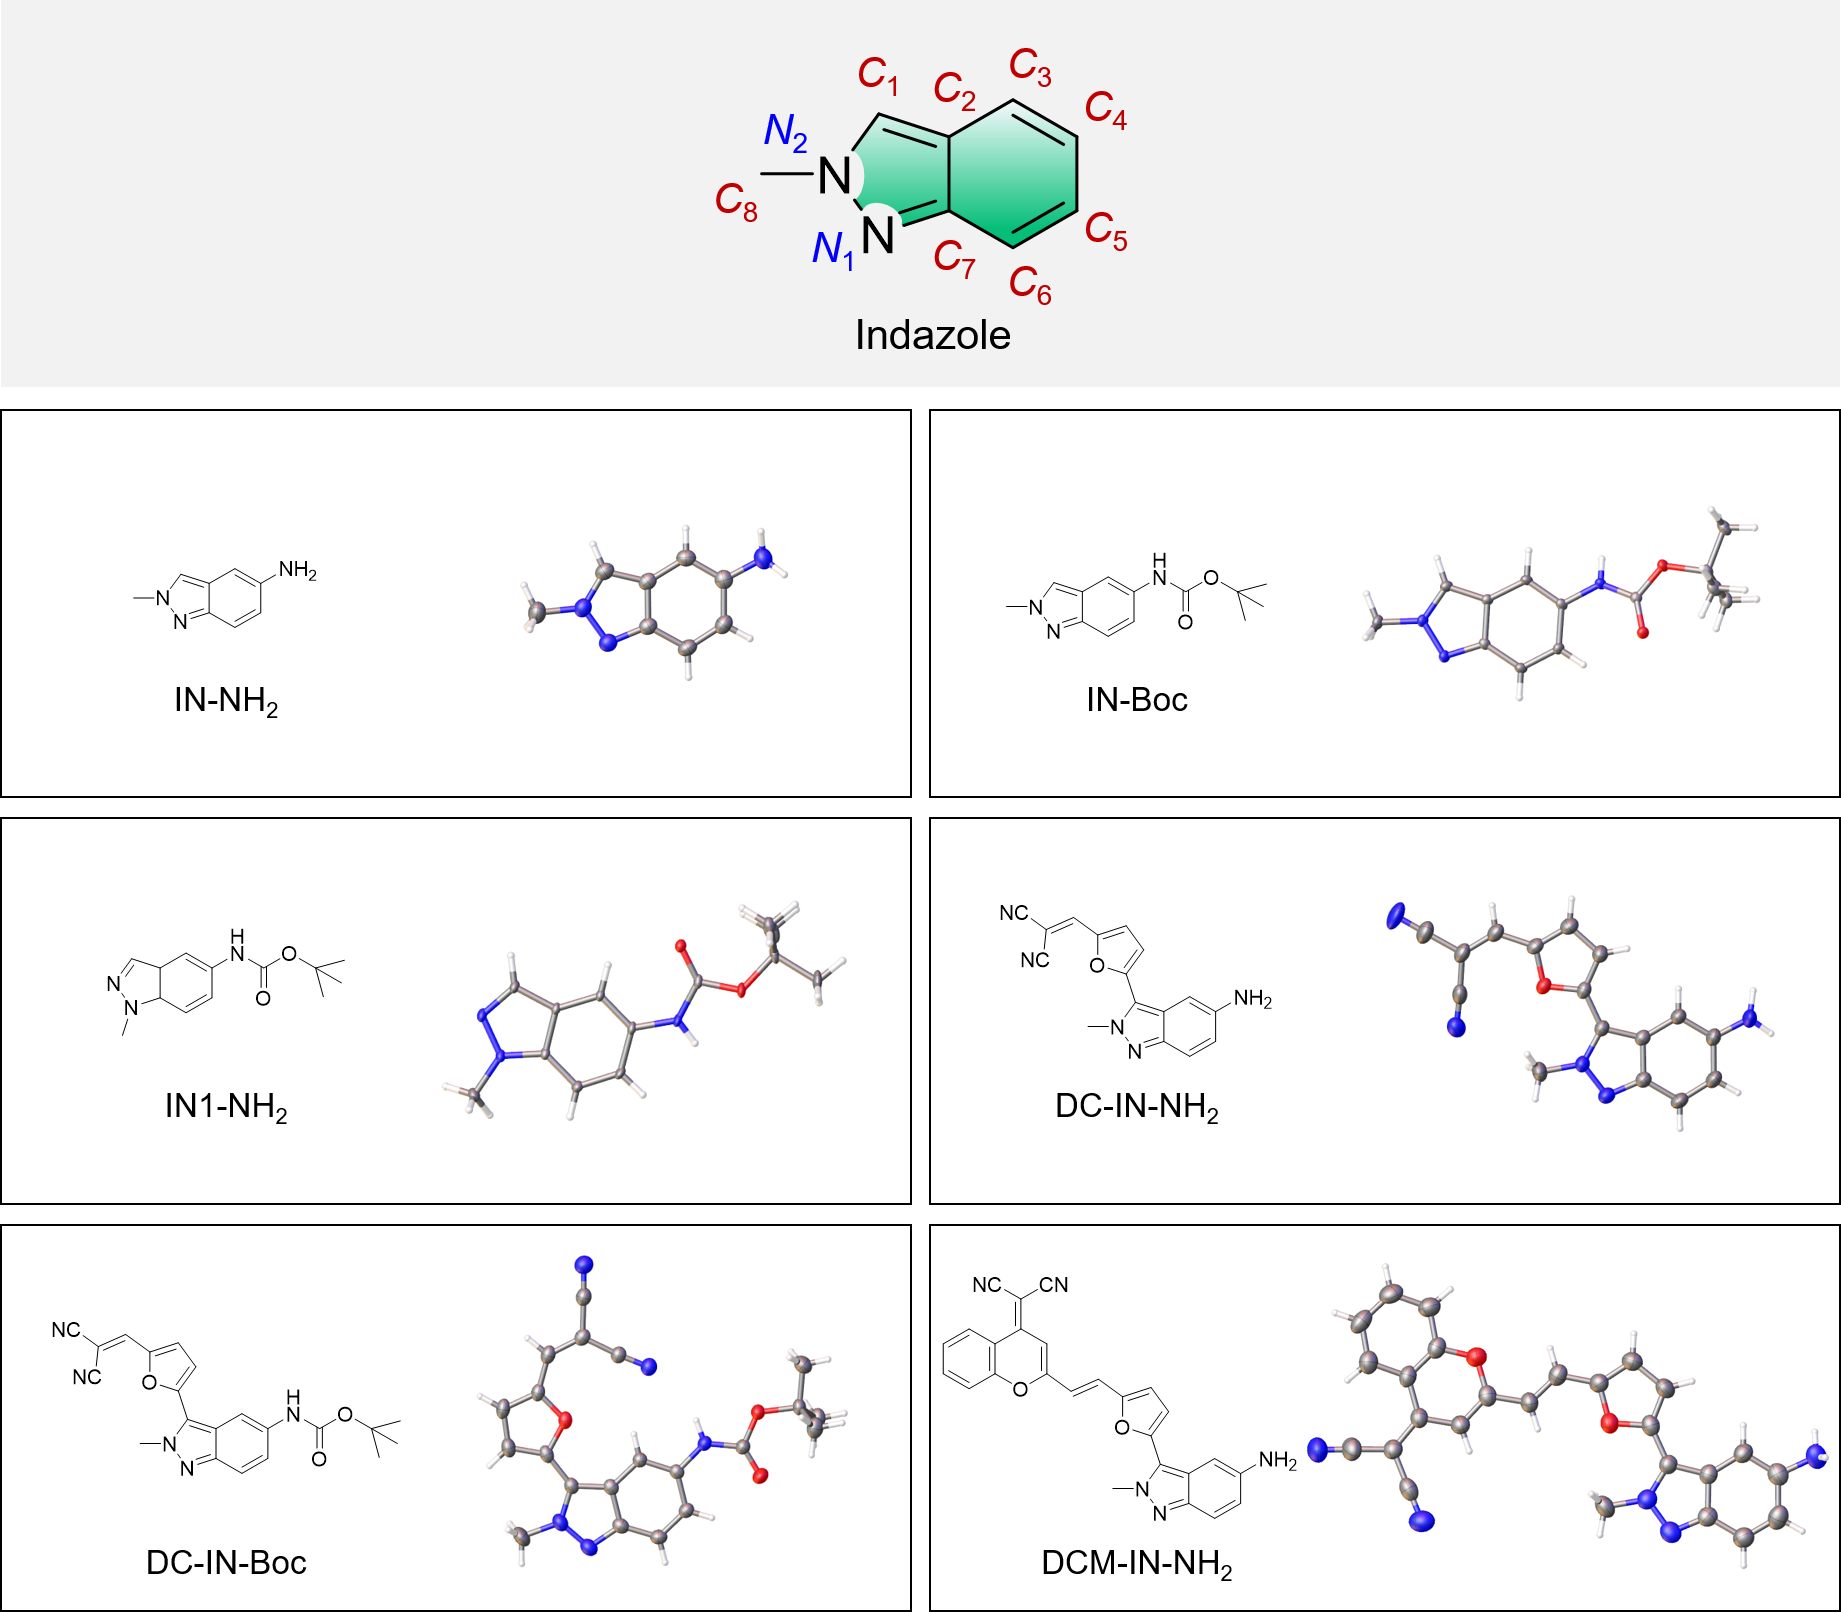
**

**Supplementary Fig. 4.** Single-crystal X-ray structures of **IN-NH2**, **IN-Boc**, **IN1-NH2**, **DC-IN-NH2**, **DC-IN-Boc**, and **DCM-IN-NH2**

**Supplementary Table 1.** Crystal data and structure refinement for **IN-NH2**. The X-ray crystallographic coordinates for **IN-NH2** have been deposited at the Cambridge Crystallographic Data Centre (CCDC), under deposition number: **2041870**.

Identification code **IN-NH2**

Empirical formula C8 H9 N3

Formula weight 147.18

Temperature 293(2) K

Wavelength 0.71073 Å

Crystal system Orthorhombic

Space group P c a 21

Unit cell dimensions a = 13.9585(8) Å *α* = 90°.

b = 7.6178(3) Å *β* = 90°.

c = 7.1646(3) Å *γ* = 90°.

Volume 761.83(6) Å3

Z 4

Density (calculated) 1.283 Mg/m3

Absorption coefficient 0.082 mm-1

F(000) 312

Crystal size 0.200 x 0.150 x 0.120 mm3

Theta range for data collection 2.919 to 25.984°.

Index ranges -17<=h<=10, -9<=k<=9, -8<=l<=8

Reflections collected 3578

Independent reflections 1424 [R(int) = 0.0197]

Completeness to theta = 25.242° 98.4 %

Absorption correction Semi-empirical from equivalents

Max. and min. transmission 0.7456 and 0.6596

Refinement method Full-matrix least-squares on F2

Data / restraints / parameters 1424 / 1 / 110

Goodness-of-fit on F2 1.106

Final R indices [I>2sigma(I)] R1 = 0.0315, wR2 = 0.0766

R indices (all data) R1 = 0.0370, wR2 = 0.0815

Absolute structure parameter 0.6(10)

Extinction coefficient 0.11(4)

Largest diff. peak and hole 0.101 and -0.077 e.Å-3

**Supplementary Table 2.** Crystal data and structure refinement for **IN-Boc**. The X-ray crystallographic coordinates for **IN-Boc** have been deposited at the Cambridge Crystallographic Data Centre (CCDC), under deposition number: **2041873**.

Identification code **IN-Boc**

Empirical formula C13 H17 N3 O2

Formula weight 247.29

Temperature 160.01 K

Wavelength 0.71073 Å

Crystal system Orthorhombic

Space group Pbca

Unit cell dimensions a = 13.8377(6) Å *α* = 90°.

b = 14.0408(5) Å *β* = 90°.

c = 14.1533(5) Å *γ* = 90°.

Volume 2749.88(18) Å3

Z 8

Density (calculated) 1.195 Mg/m3

Absorption coefficient 0.083 mm-1

F(000) 1056

Crystal size 0.33 x 0.25 x 0.2 mm3

Theta range for data collection 2.878 to 26.991°.

Index ranges -13<=h<=17, -16<=k<=17, -17<=l<=18

Reflections collected 12335

Independent reflections 2979 [R(int) = 0.0885]

Completeness to theta = 25.242° 99.4 %

Absorption correction Semi-empirical from equivalents

Max. and min. transmission 0.7461 and 0.3021

Refinement method Full-matrix least-squares on F2

Data / restraints / parameters 2979 / 0 / 167

Goodness-of-fit on F2 0.967

Final R indices [I>2sigma(I)] R1 = 0.0701, wR2 = 0.1814

R indices (all data) R1 = 0.0873, wR2 = 0.1984

Extinction coefficient n/a

Largest diff. peak and hole 0.399 and -0.336 e.Å-3

**Supplementary Table 3.** Crystal data and structure refinement for **IN1-Boc**. The X-ray crystallographic coordinates for **IN1-Boc** have been deposited at the Cambridge Crystallographic Data Centre (CCDC), under deposition number: **2041871**.

Identification code **IN1-Boc**

Empirical formula C13 H17 N3 O2

Formula weight 247.29

Temperature 160.02 K

Wavelength 0.71073 Å

Crystal system Orthorhombic

Space group Pbca

Unit cell dimensions a = 12.8091(5) Å *α* = 90°.

b = 12.5740(4) Å *β* = 90°.

c = 16.5762(5) Å *γ* = 90°.

Volume 2669.79(16) Å3

Z 8

Density (calculated) 1.230 Mg/m3

Absorption coefficient 0.085 mm-1

F(000) 1056

Crystal size 0.25 x 0.1 x 0.05 mm3

Theta range for data collection 2.457 to 30.503°.

Index ranges -18<=h<=15, -15<=k<=17, -23<=l<=23

Reflections collected 29525

Independent reflections 4065 [R(int) = 0.1142]

Completeness to theta = 25.242° 99.8 %

Absorption correction Semi-empirical from equivalents

Max. and min. transmission 0.7461 and 0.4179

Refinement method Full-matrix least-squares on F2

Data / restraints / parameters 4065 / 0 / 167

Goodness-of-fit on F2 1.063

Final R indices [I>2sigma(I)] R1 = 0.0702, wR2 = 0.1511

R indices (all data) R1 = 0.0995, wR2 = 0.1684

Extinction coefficient n/a

Largest diff. peak and hole 0.315 and -0.331 e.Å-3

**Supplementary Table 4.** Crystal data and structure refinement for **DM-IN-NH2**. The X-ray crystallographic coordinates for **DM-IN-NH2** have been deposited at the Cambridge Crystallographic Data Centre (CCDC), under deposition number: **2041872**.

Identification code **DM-IN-NH2**

Empirical formula C16 H11 N5 O

Formula weight 289.30

Temperature 293(2) K

Wavelength 0.71073 Å

Crystal system Orthorhombic

Space group P 21 21 21

Unit cell dimensions a = 6.807(2) Å *α* = 90°.

b = 13.763(5) Å *β* = 90°.

c = 15.414(5) Å *γ* = 90°.

Volume 1443.9(8) Å3

Z 4

Density (calculated) 1.331 Mg/m3

Absorption coefficient 0.089 mm-1

F(000) 600

Crystal size 0.120 x 0.080 x 0.040 mm3

Theta range for data collection 2.643 to 25.500°.

Index ranges -8<=h<=8, -16<=k<=16, -18<=l<=18

Reflections collected 20143

Independent reflections 2685 [R(int) = 0.0937]

Completeness to theta = 25.242° 99.7 %

Absorption correction Semi-empirical from equivalents

Max. and min. transmission 0.7456 and 0.6536

Refinement method Full-matrix least-squares on F2

Data / restraints / parameters 2685 / 0 / 209

Goodness-of-fit on F2 1.062

Final R indices [I>2sigma(I)] R1 = 0.0561, wR2 = 0.1269

R indices (all data) R1 = 0.1107, wR2 = 0.1579

Absolute structure parameter 0.4(10)

Extinction coefficient 0.017(6)

Largest diff. peak and hole 0.154 and -0.138 e.Å-3

**Supplementary Table 5.** Crystal data and structure refinement for **DM-IN-Boc**. The X-ray crystallographic coordinates for **DM-IN-Boc** have been deposited at the Cambridge Crystallographic Data Centre (CCDC), under deposition number: **2041875**.

Identification code **DM-IN-Boc**

Empirical formula C21 H19 N5 O3

Formula weight 389.41

Temperature 293(2) K

Wavelength 0.71073 Å

Crystal system Monoclinic

Space group P 21/m

Unit cell dimensions a = 11.211(3) Å *α* = 90°.

b = 6.7154(16) Å *β* = 95.461(6)°.

c = 12.960(3) Å *γ* = 90°.

Volume 971.4(4) Å3

Z 2

Density (calculated) 1.331 Mg/m3

Absorption coefficient 0.092 mm-1

F(000) 408

Crystal size 0.190 x 0.050 x 0.040 mm3

Theta range for data collection 2.296 to 26.000°.

Index ranges -13<=h<=13, -8<=k<=8, -15<=l<=15

Reflections collected 9048

Independent reflections 2068 [R(int) = 0.0673]

Completeness to theta = 25.242° 99.8 %

Absorption correction Semi-empirical from equivalents

Max. and min. transmission 0.7456 and 0.6683

Refinement method Full-matrix least-squares on F2

Data / restraints / parameters 2068 / 0 / 199

Goodness-of-fit on F2 1.068

Final R indices [I>2sigma(I)] R1 = 0.0524, wR2 = 0.1006

R indices (all data) R1 = 0.0988, wR2 = 0.1245

Extinction coefficient 0.044(6)

Largest diff. peak and hole 0.179 and -0.146 e.Å-3

**Supplementary Table 6.** Crystal data and structure refinement for **DCM-IN-NH2**. The X-ray crystallographic coordinates for **DCM-IN-NH2** have been deposited at the Cambridge Crystallographic Data Centre (CCDC), under deposition number: **2041874**.

Identification code **DCM-IN-NH2**

Empirical formula C26 H17 N5 O2

Formula weight 431.45

Temperature 293(2) K

Wavelength 0.71073 Å

Crystal system Orthorhombic

Space group P b c a

Unit cell dimensions a = 14.015(5) Å *α* = 90°.

b = 16.741(6) Å *β* = 90°.

c = 18.395(7) Å *γ* = 90°.

Volume 4316(3) Å3

Z 8

Density (calculated) 1.328 Mg/m3

Absorption coefficient 0.088 mm-1

F(000) 1792

Crystal size 0.120 x 0.080 x 0.050 mm3

Theta range for data collection 2.214 to 24.995°.

Index ranges -16<=h<=16, -19<=k<=19, -16<=l<=21

Reflections collected 18341

Independent reflections 3793 [R(int) = 0.1928]

Completeness to theta = 25.242° 97.3 %

Absorption correction Semi-empirical from equivalents

Max. and min. transmission 0.7456 and 0.5728

Refinement method Full-matrix least-squares on F2

Data / restraints / parameters 3793 / 0 / 300

Goodness-of-fit on F2 0.997

Final R indices [I>2sigma(I)] R1 = 0.1036, wR2 = 0.2273

R indices (all data) R1 = 0.2900, wR2 = 0.3405

Extinction coefficient n/a

Largest diff. peak and hole 0.253 and -0.199 e.Å-3

# 4. Quantum chemical calculations for elucidating the unusual fluorescence umpolung mechanism


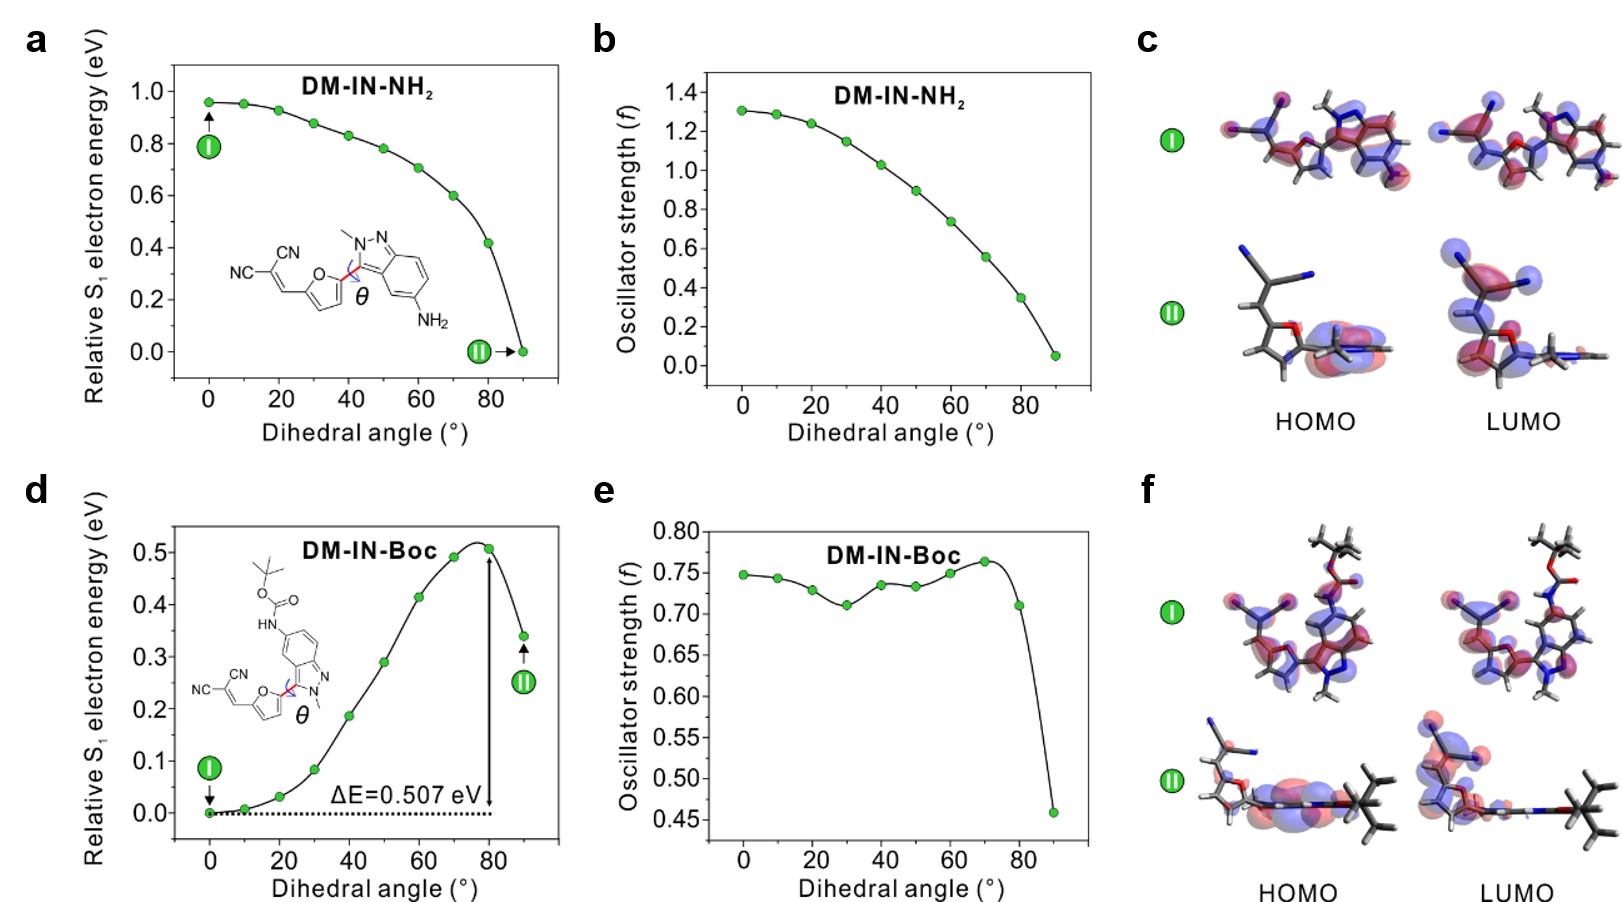


**Supplementary Fig. 5.** (**a**) Calculated S1 potential energy surfaces, (**b**) corresponding oscillator strength as a function of *θ*, and (**c**) representative molecular structures I and II and associated frontier molecular orbitals both in the planar and the perpendicular conformations for **DM-IN-NH2** in DMSO. (**d**) Calculated S1 potential energy surfaces, (**e**) corresponding oscillator strength as a function of *θ*, and (**f**) representative molecular structures I and II and associated frontier molecular orbitals both in the planar and the perpendicular conformations for **DM-IN-NH2** in DMSO.

# 5. ESI-MS spectra characterization of Lighter EW Tracker reaction with NAT2 mimic


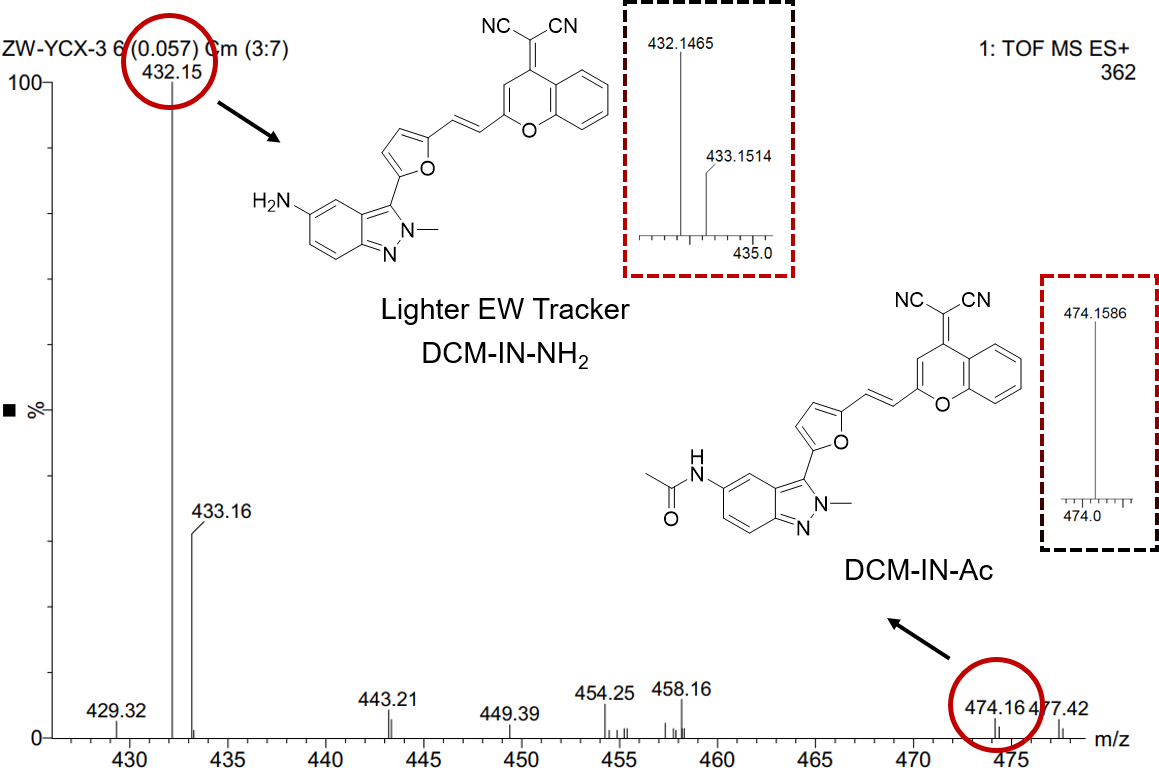


**Supplementary Fig. 6.** ESI-MS and high-resolution mass spectra (HRMS) of the products from the reaction of **Lighter EW Tracker** (**DCM-IN-NH2**) with NAT2 mimic.

# 6. Quantitative and light-up detection of DCP


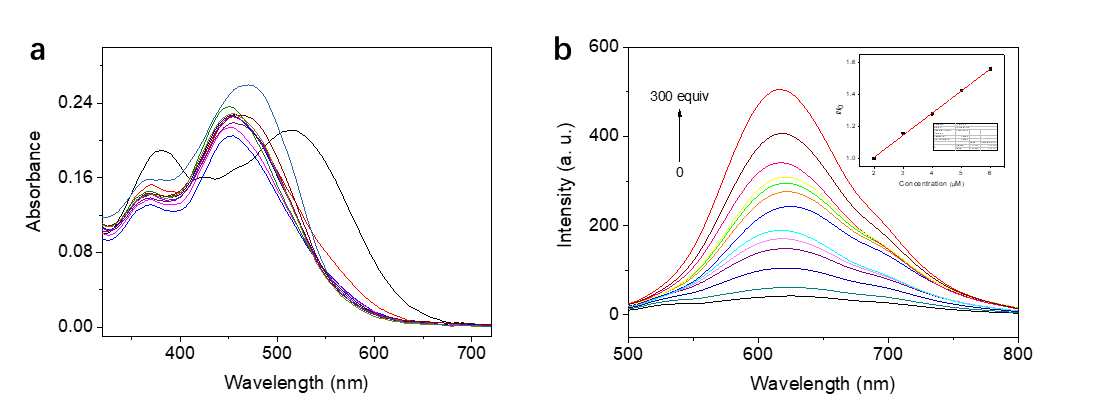


**Supplementary Fig. 7.** Absorption (**a**) and emission (**b**) spectra spectra of **Lighter EW Tracker** (**DCM-IN-NH2**,10 μM) with increasing concentration of DCP (0-300 equiv) in CH3CN solution, *λ*ex=470 nm. Inset: Variations in *I*/*I*0 of **Lighter EW Tracker** with different concentration of DCP, *I*0 and *I* are the emission intensities of **DCM-IN-NH2** at a specific concentration of DCP, respectively.

# 7. ESI-MS spectra characterization of Lighter EW Tracker reaction with DCP


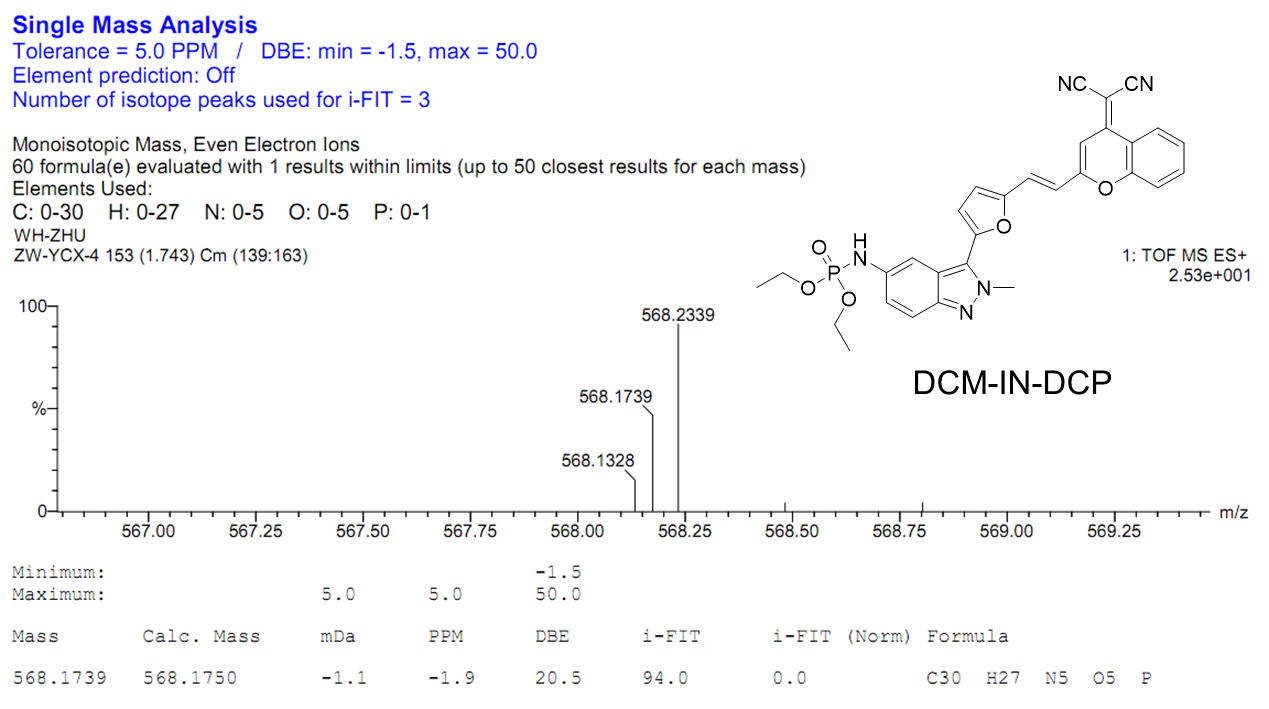


**Supplementary Fig. 8.** HRMS spectrum of **DCM-IN-DCP** from the reaction of **Lighter EW Tracker** (**DCM-IN-NH2**) with DCP.

# 8. Intracellular localization of Lighter EW Tracker


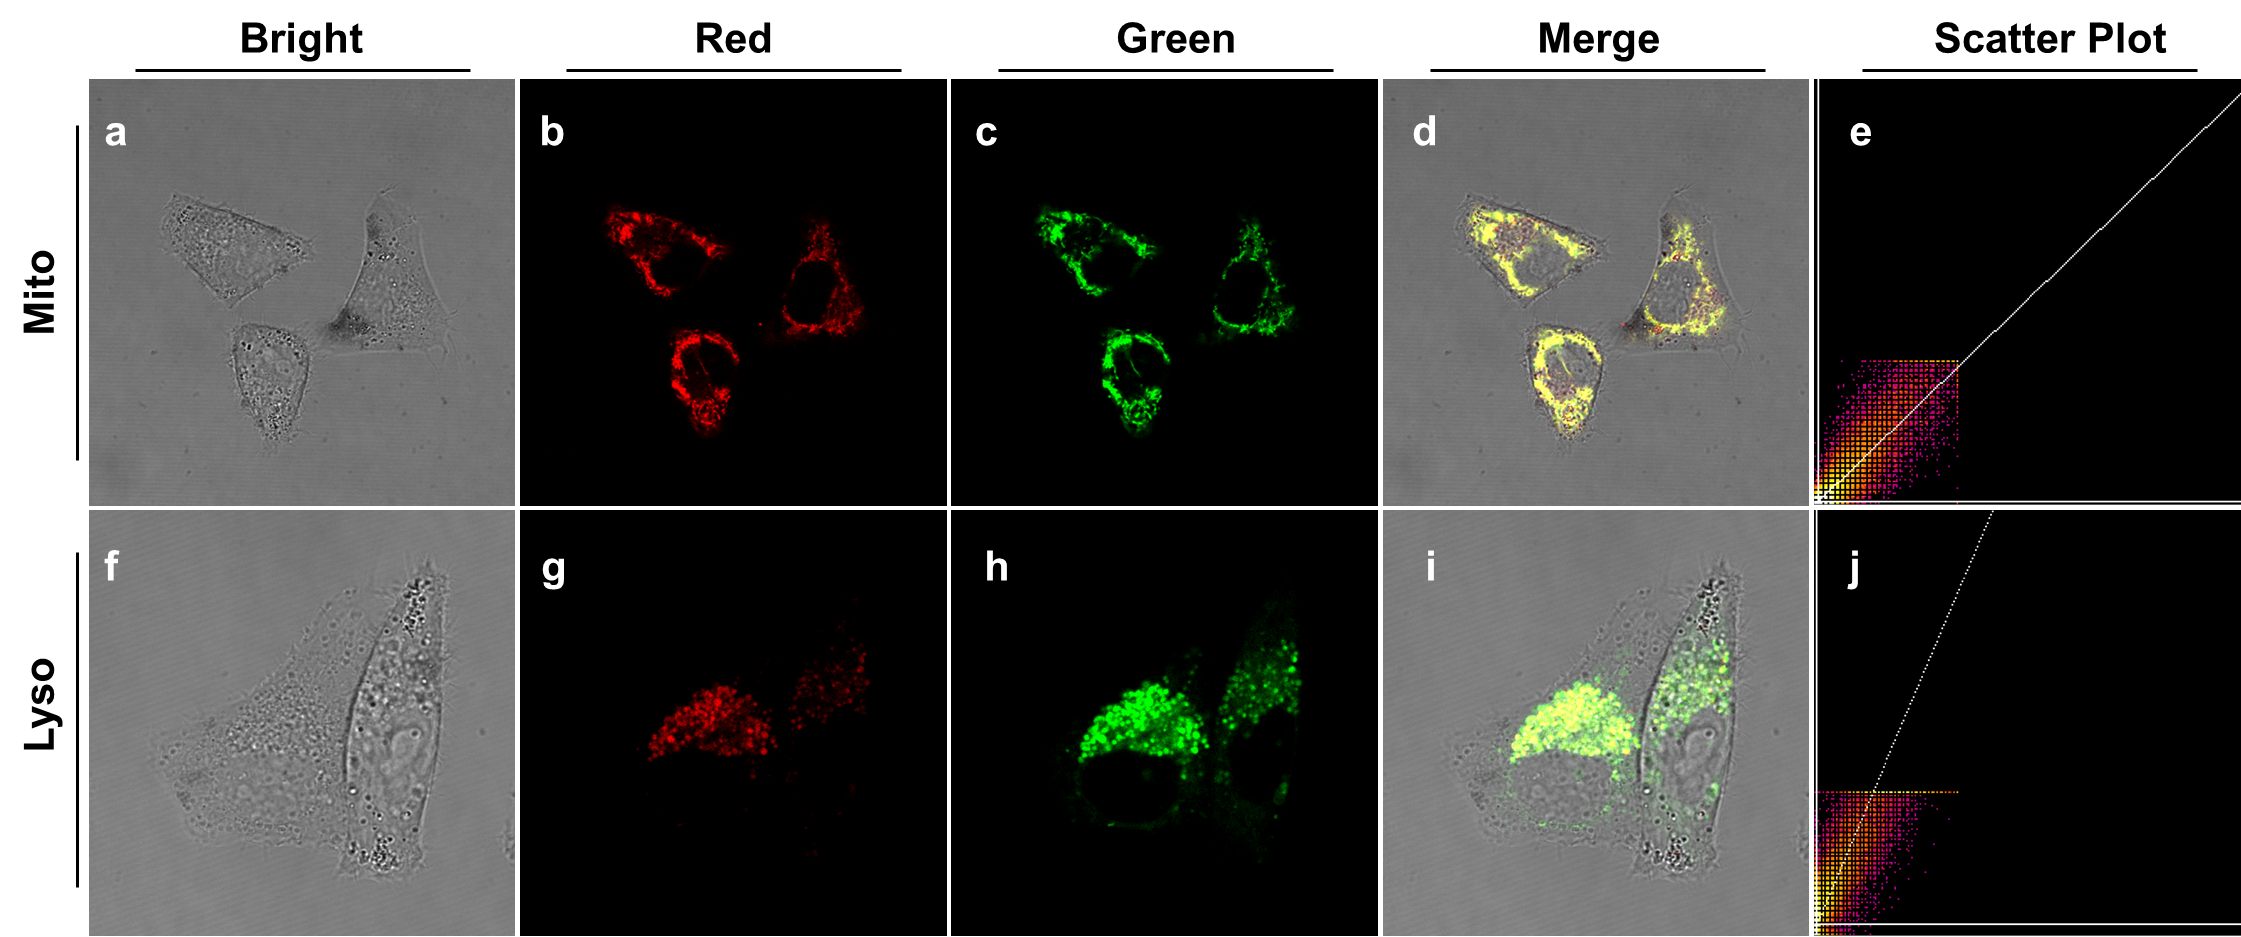


**Supplementary Fig. 9.** CLSM images for intracellular localization of **Lighter EW Tracker** (**DCM-IN-NH2**) in HepG2 cells. Cells were incubated with **Lighter EW Tracker** (10 μM) for 3 h and then co-stained with 100 nM Lyso-Tracker Red DND-99 (**a-e**) and 200 nM Mito-Tracker Red (**f-j**) for 30 min, respectively. The green channel at 590-610 nm for Lyso-Tracker Red DND-99 and Mito-Tracker Red, *λ*ex = 568 nm. The Red channel at 650-800 nm, *λ*ex = 520 nm. Note: Pearson’s correlation coefficient of **Lighter EW Tracker** is 0.8988 and 0.7822 with Mito-Tracker Red and Lyso-Tracker Red DND-99, respectively.

# 9. Characterization of indazole-based fluorophores


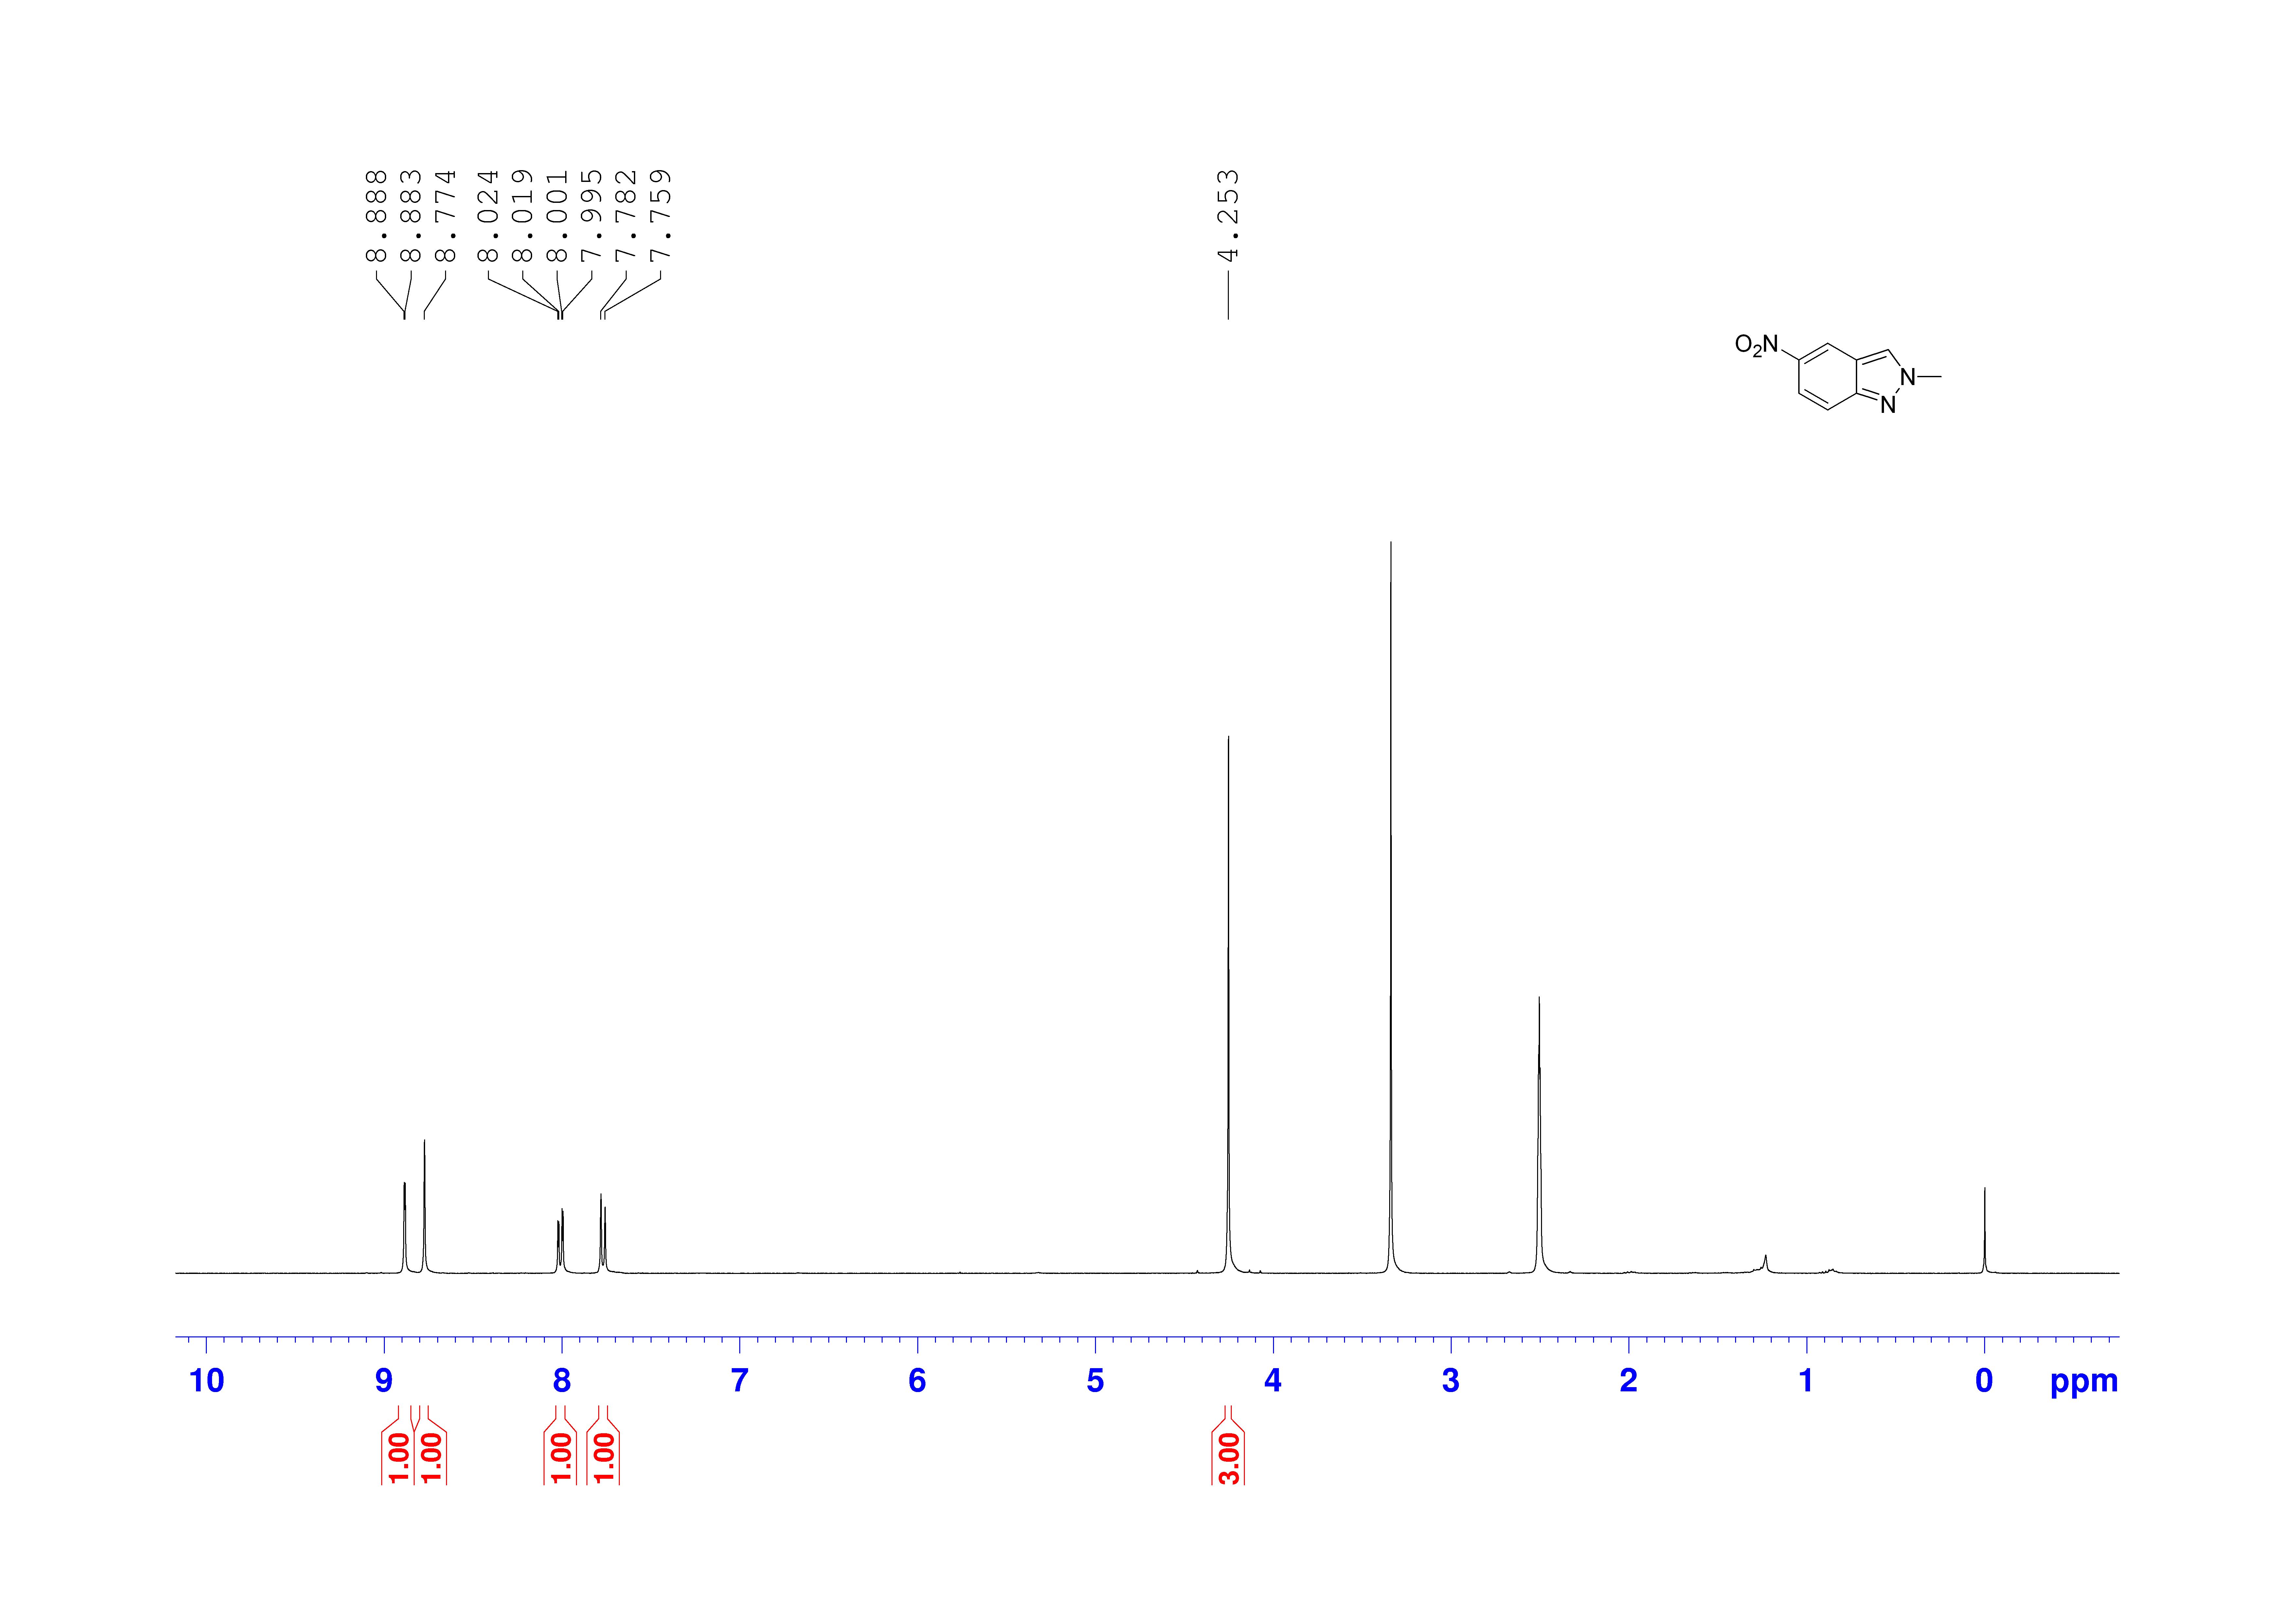


**Supplementary Fig. 10.** 1H NMR spectrum of **IN-NO2** in DMSO-*d*6


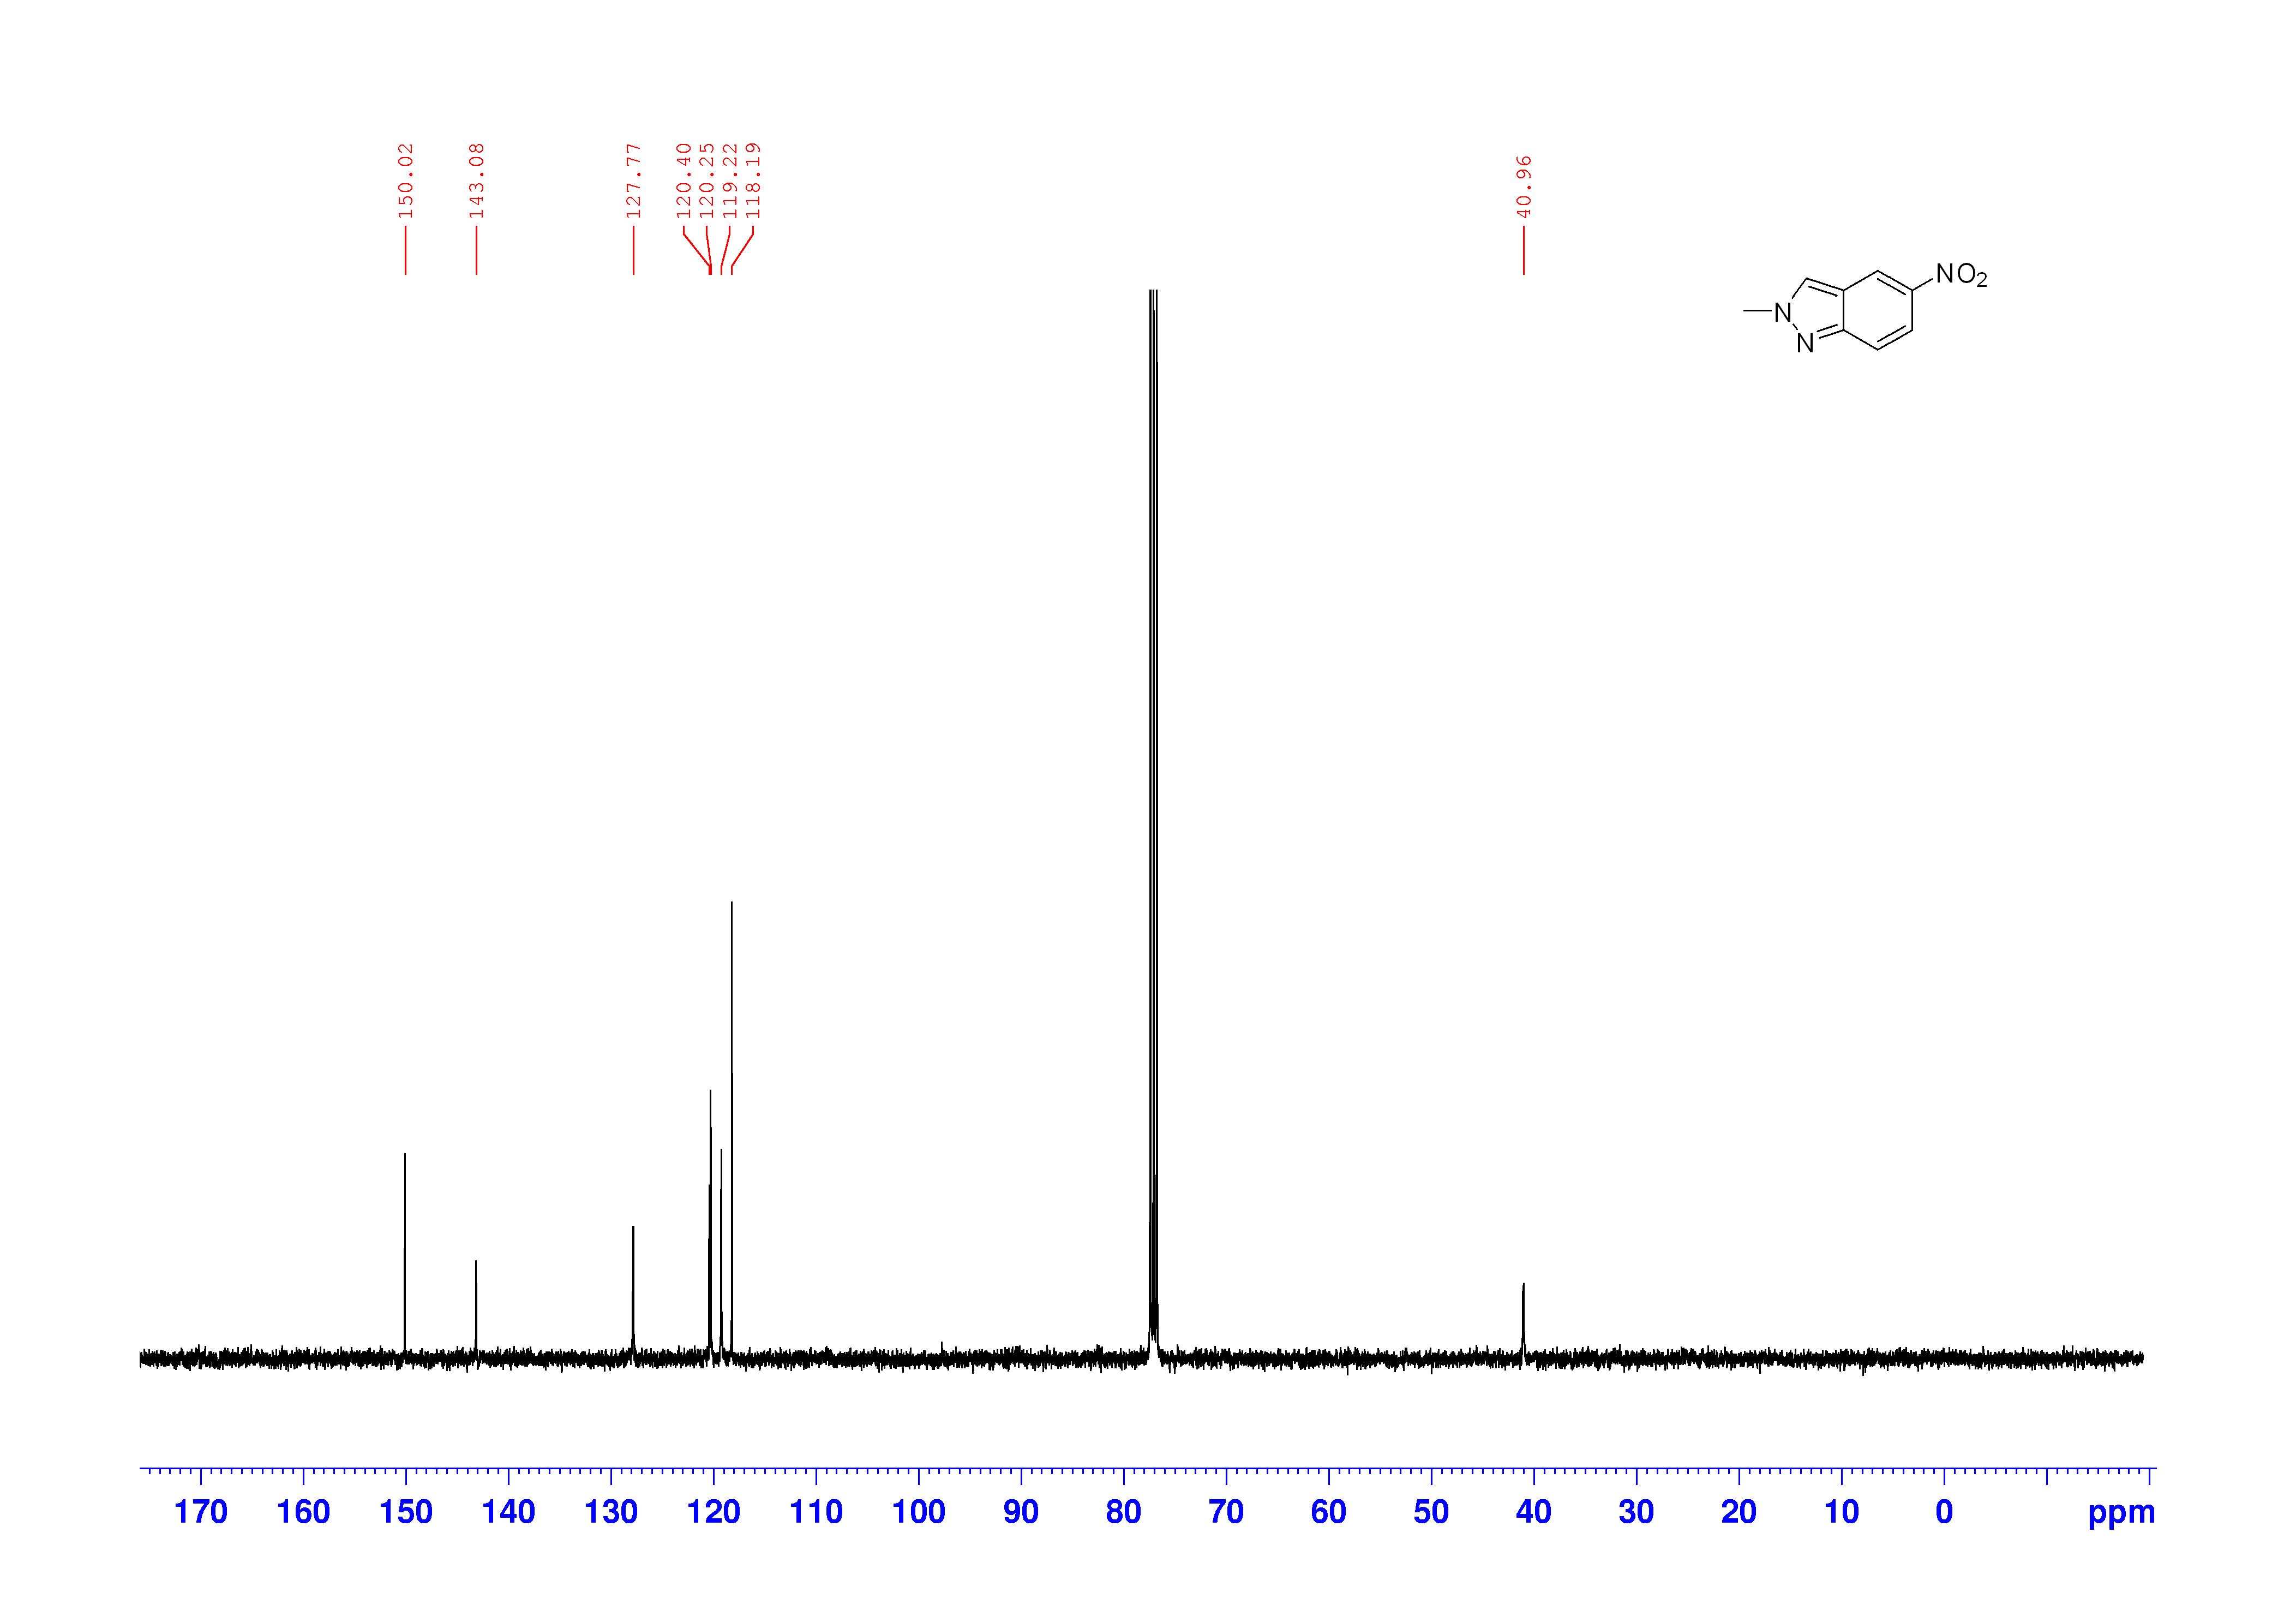


**Supplementary Fig. 11.** 13C NMR spectrum of **IN-NO2** in CDCl3


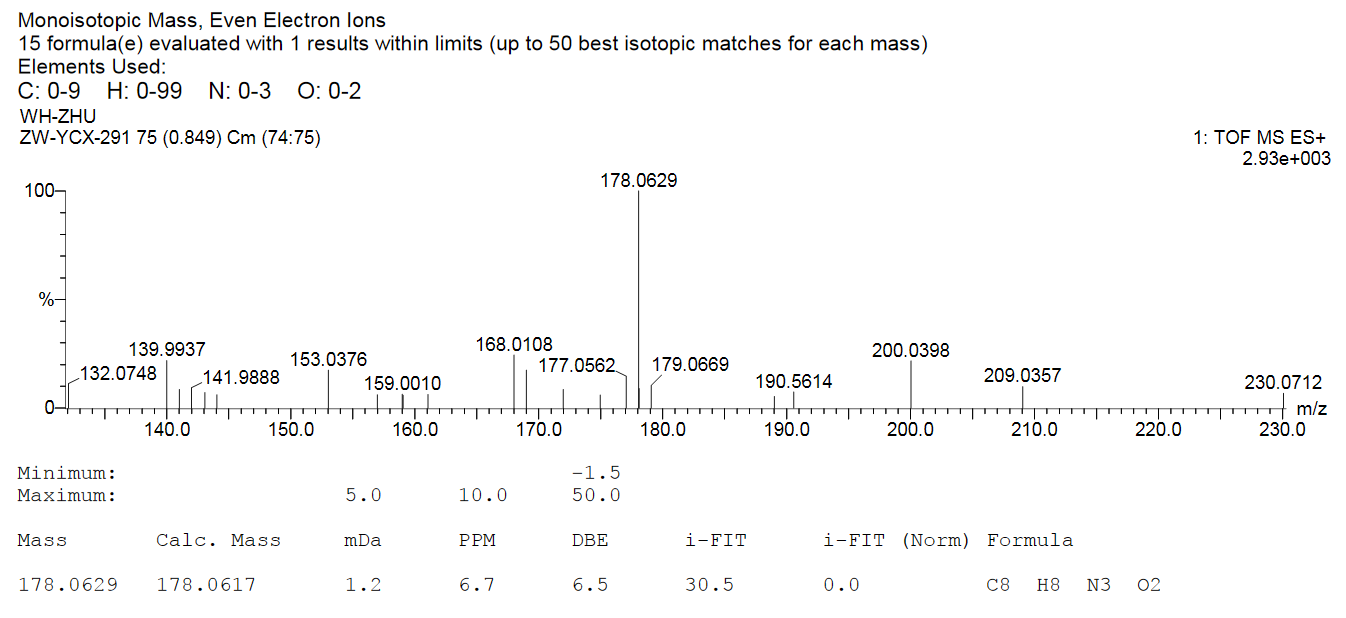


**Supplementary Fig. 12.** HRMS spectrum of **IN-NO2**


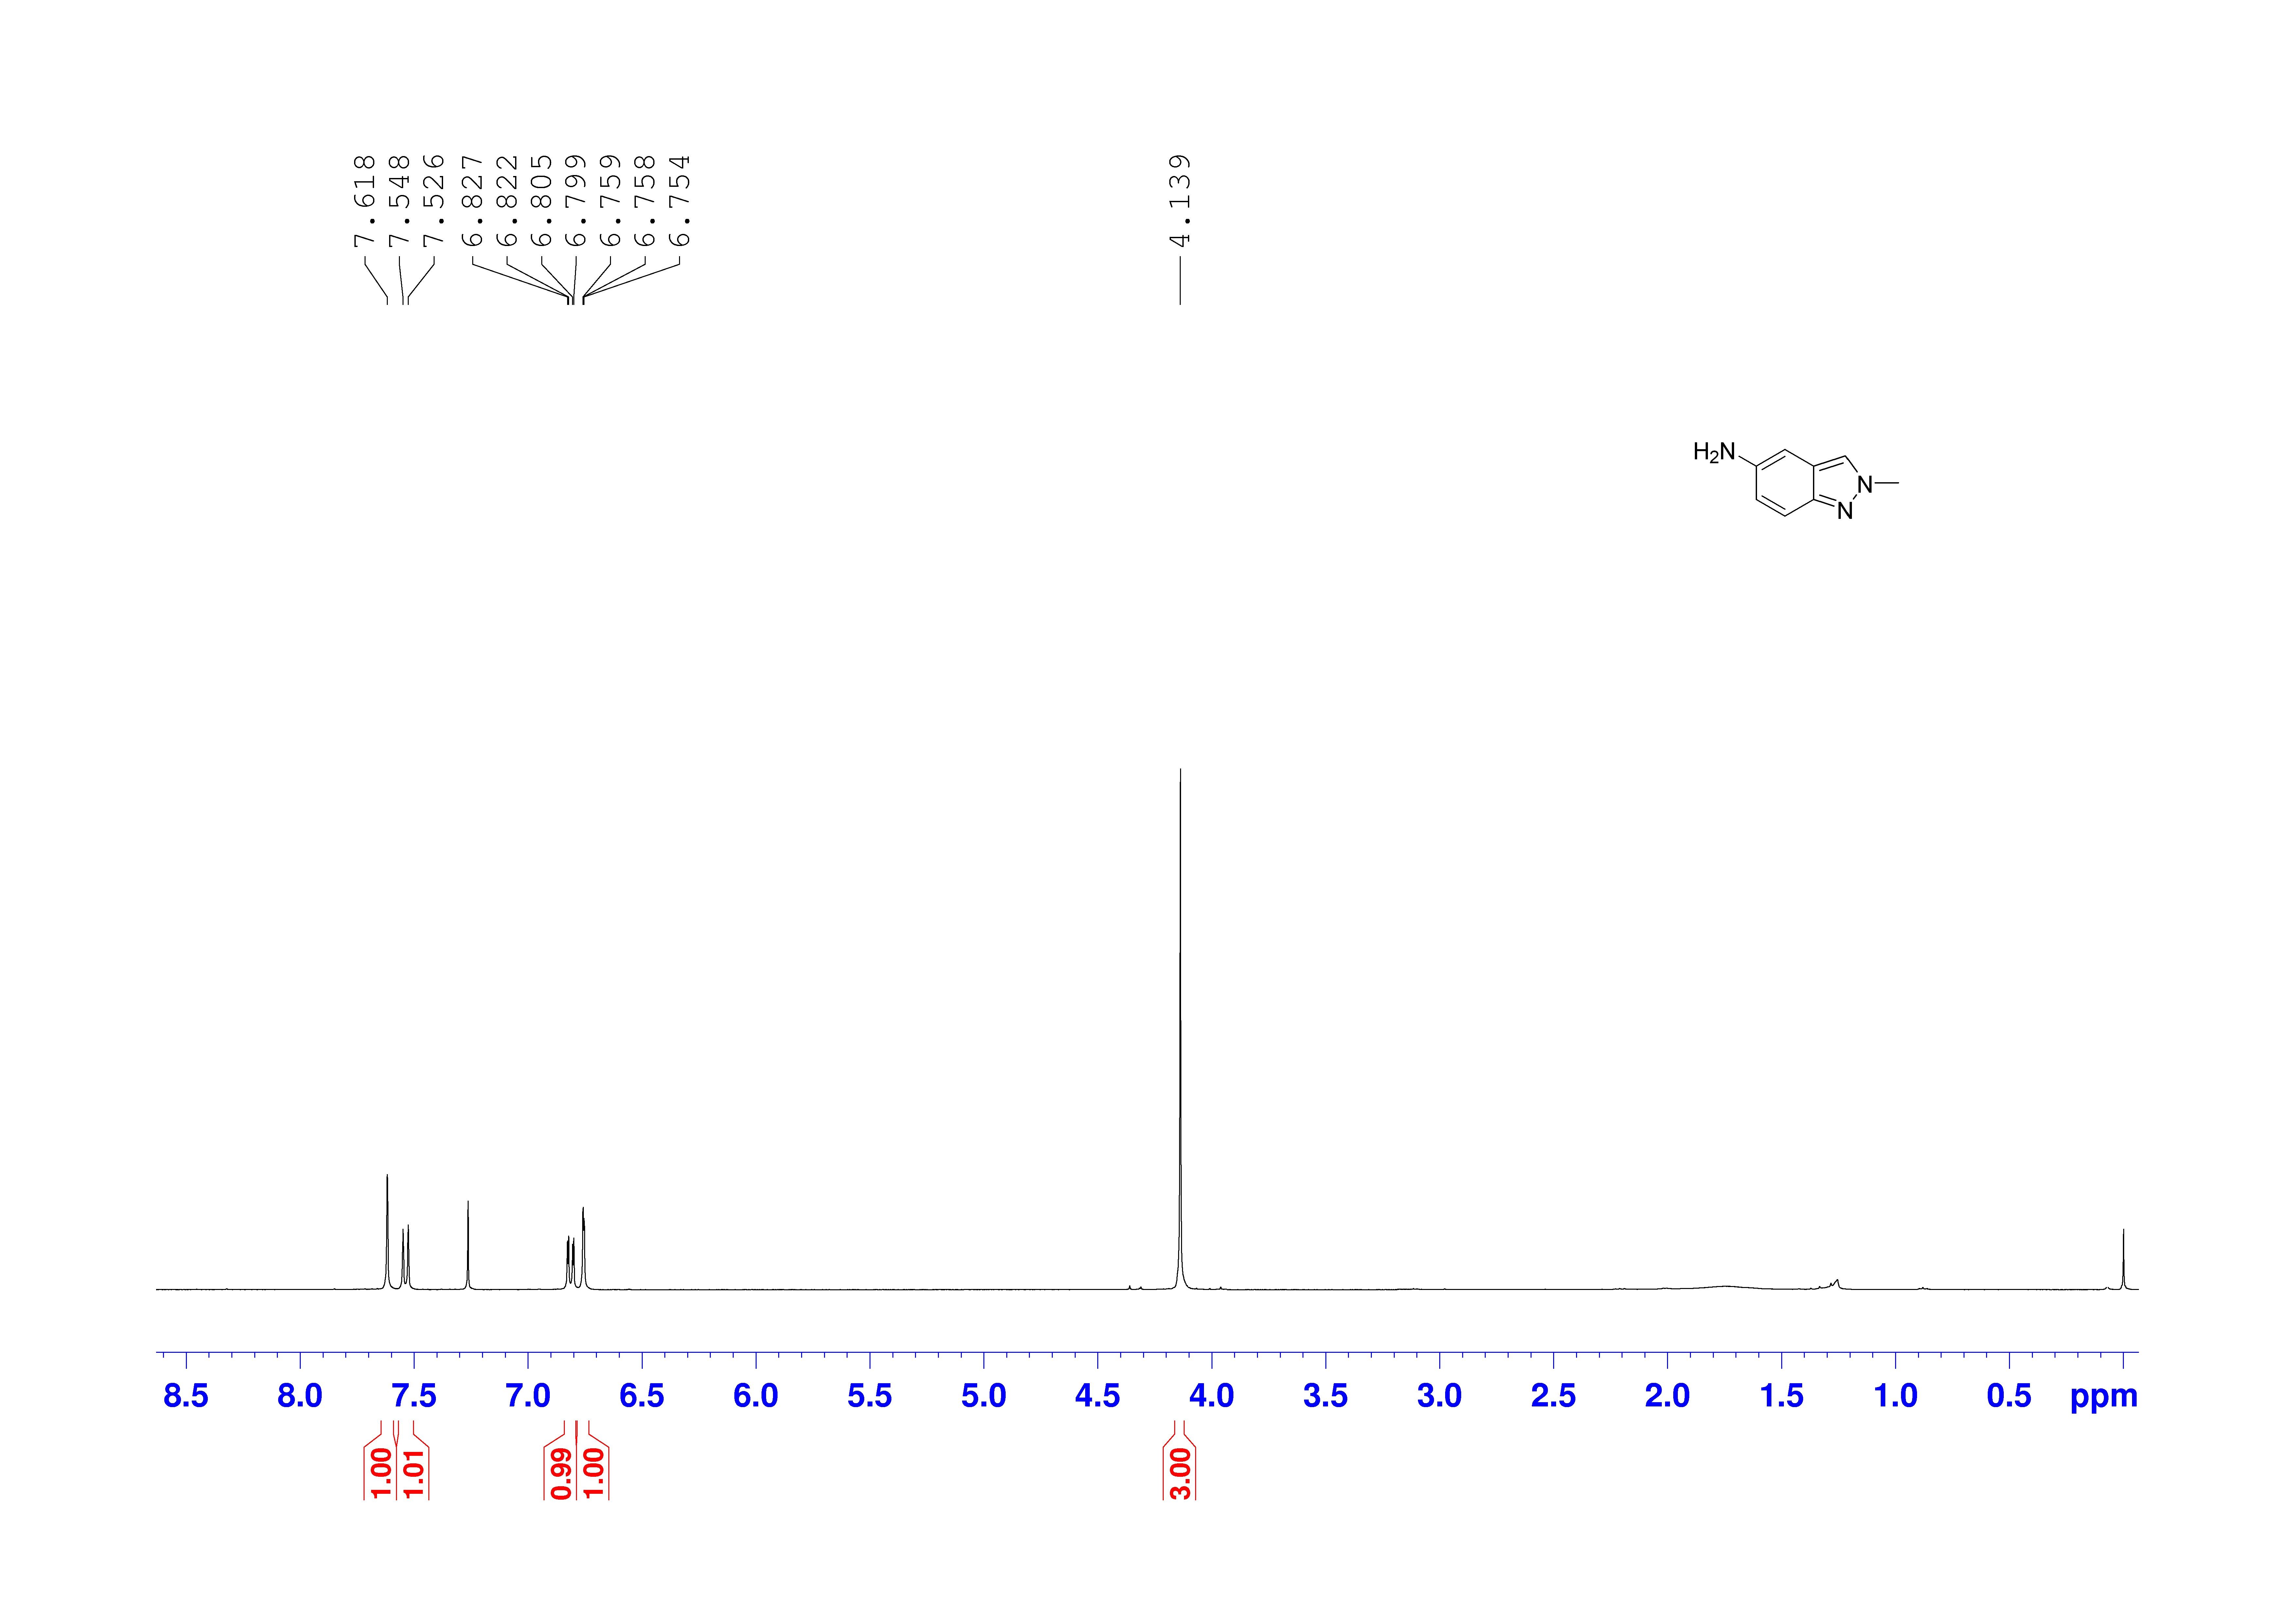


**Supplementary Fig. 13.** 1H NMR spectrum of **IN-NH2** in CDCl3


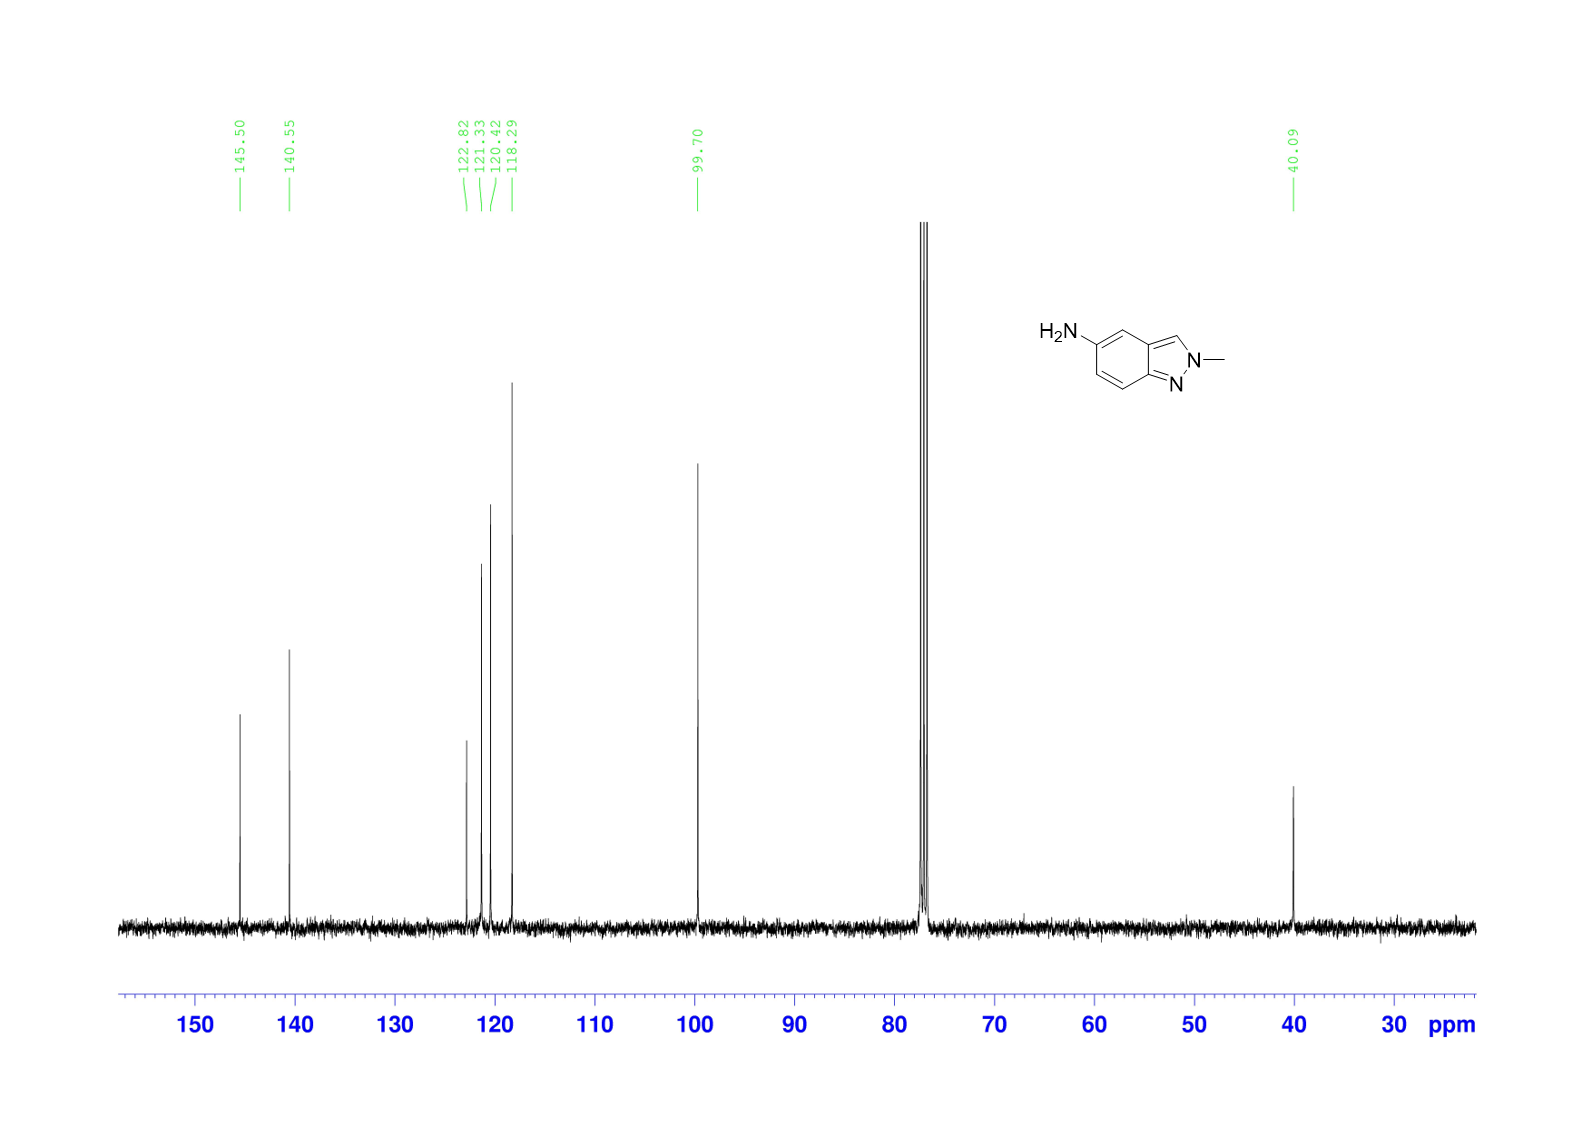


**Supplementary Fig. 14.** 13C NMR spectrum of **IN-NH2** in CDCl3


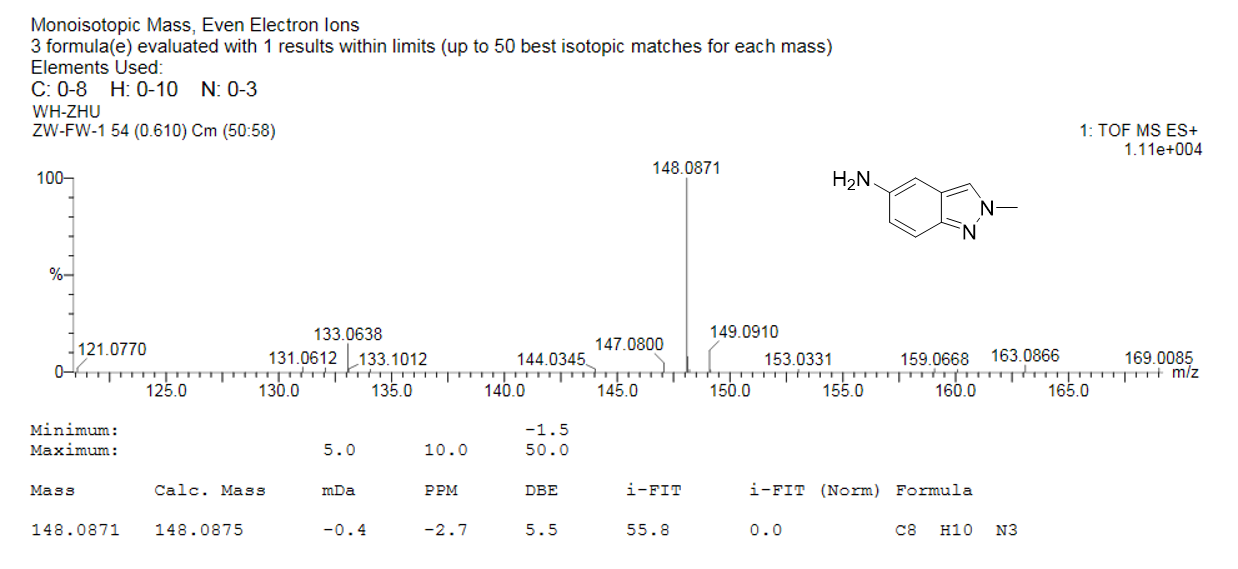


**Supplementary Fig. 15.** HRMS spectrum of **IN-NH2**


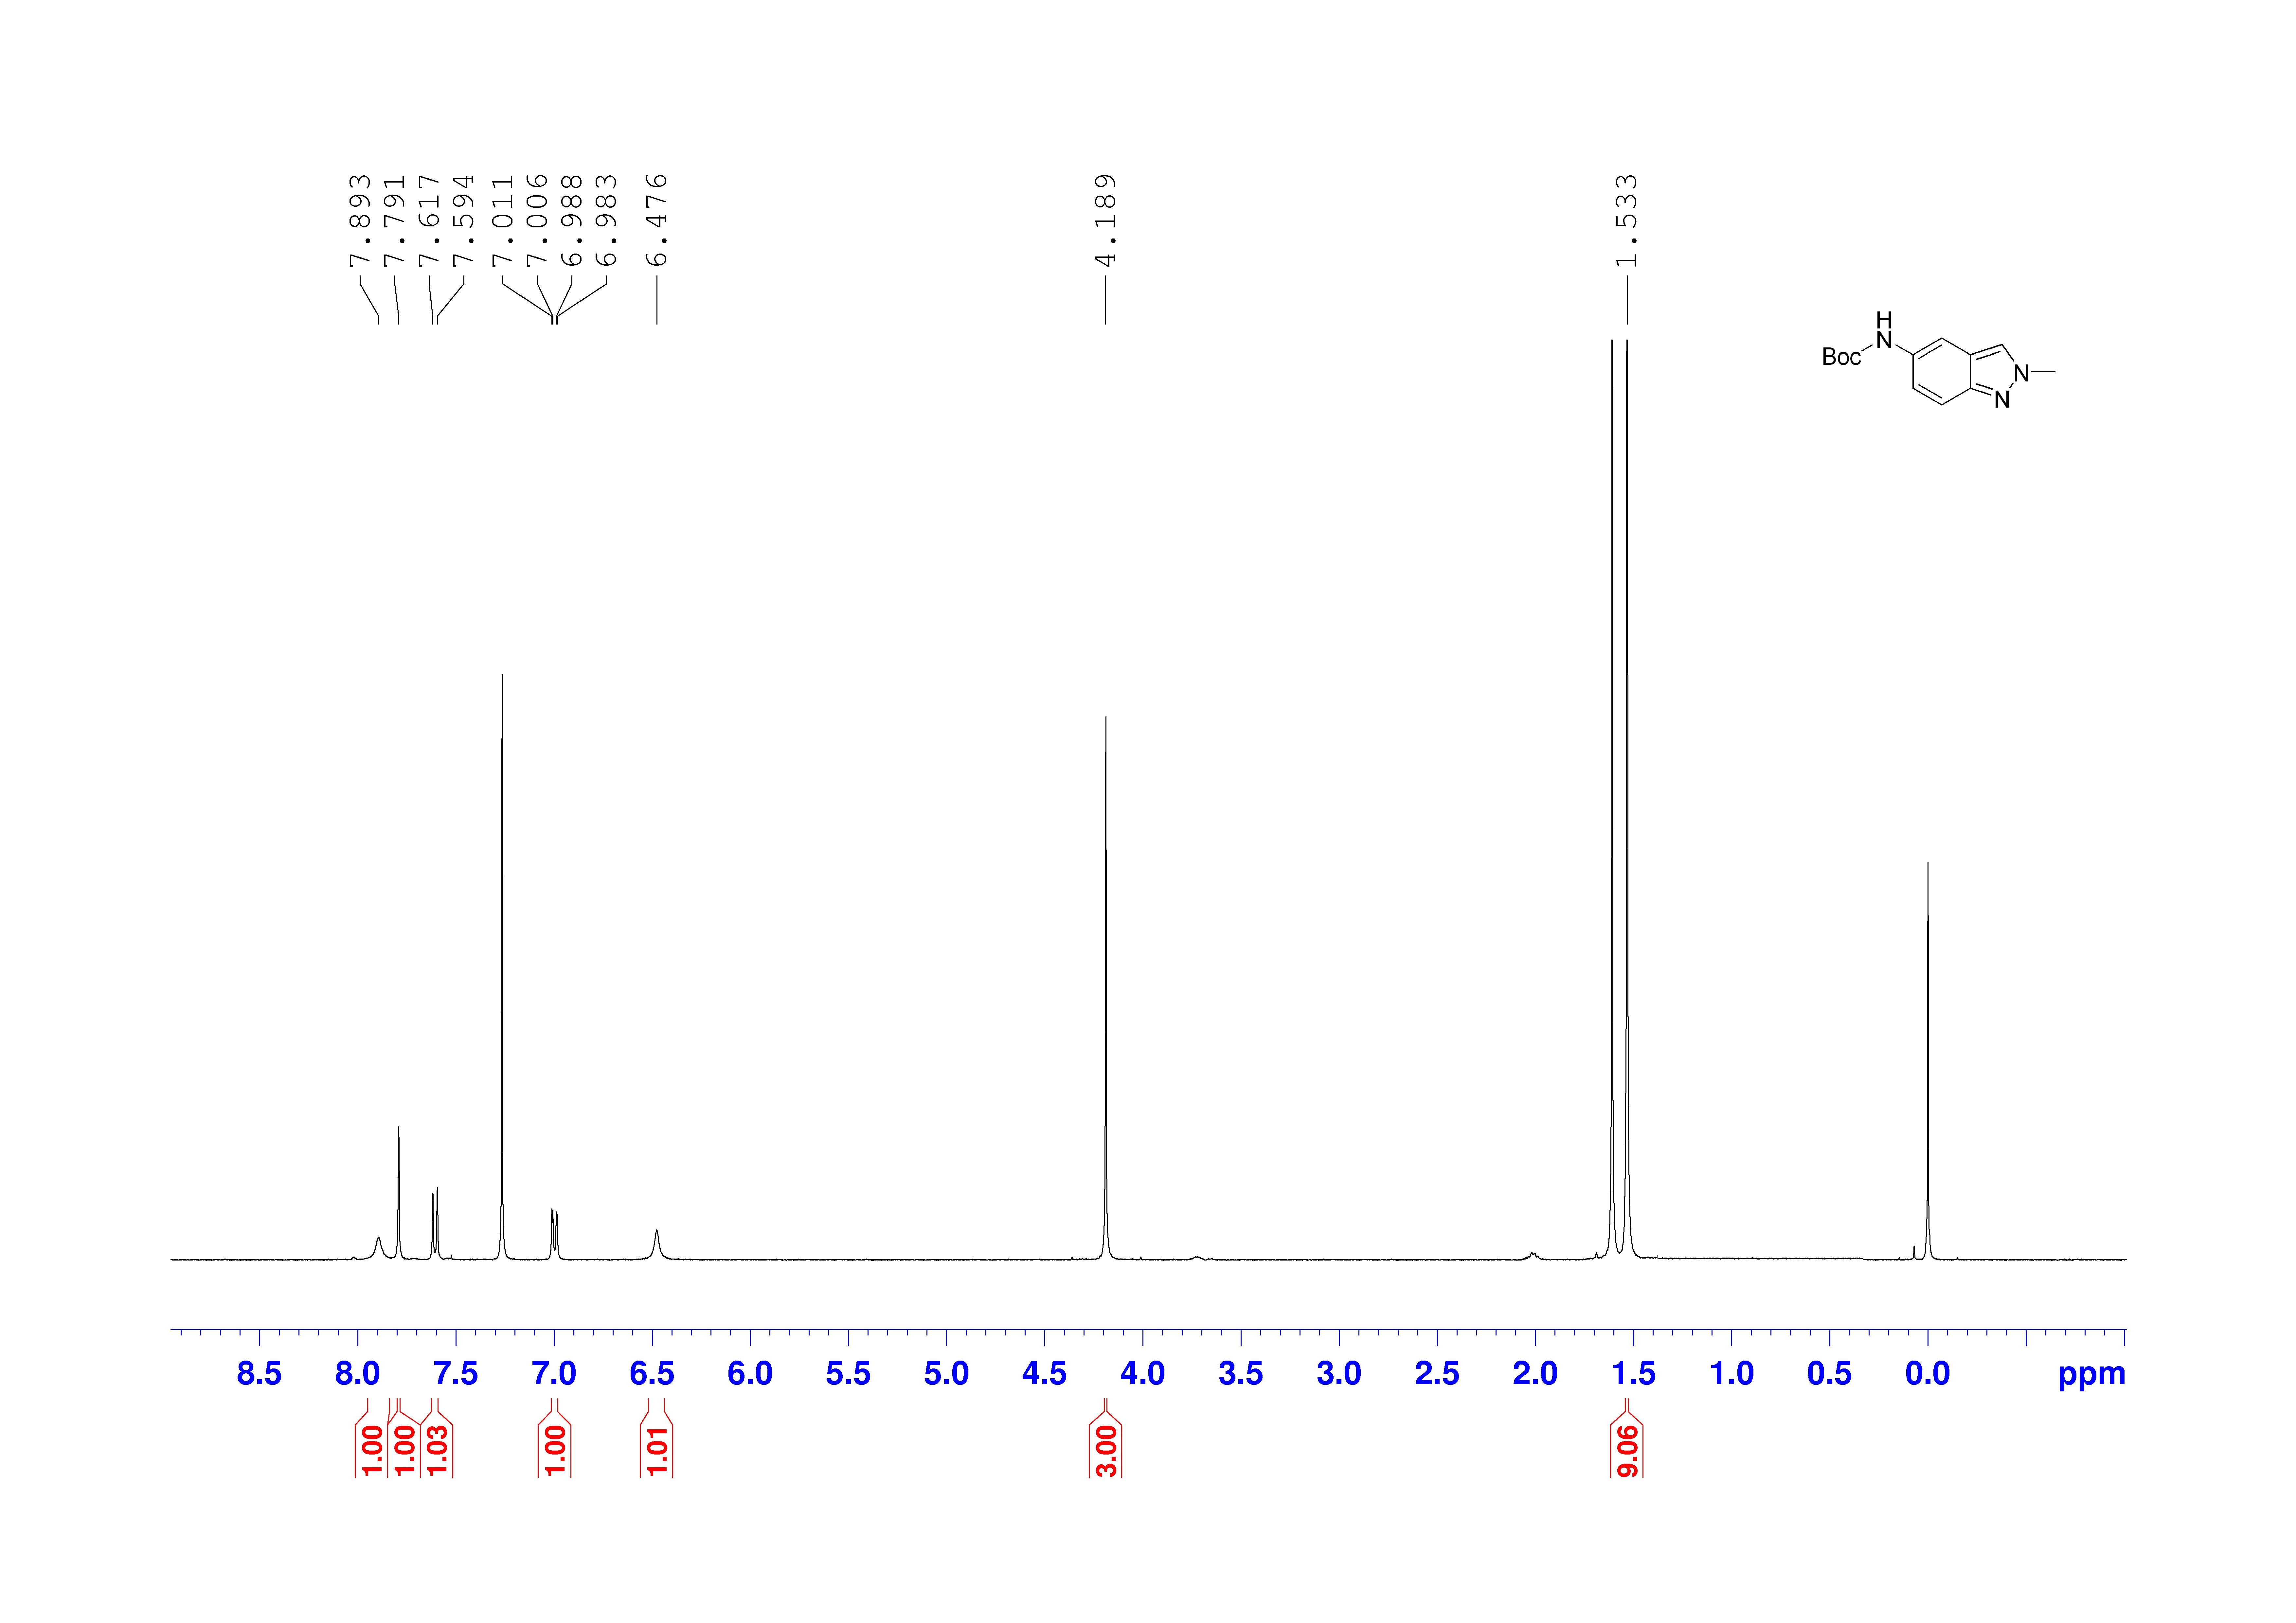


**Supplementary Fig. 16.** 1H NMR spectrum of **IN-Boc** in CDCl3


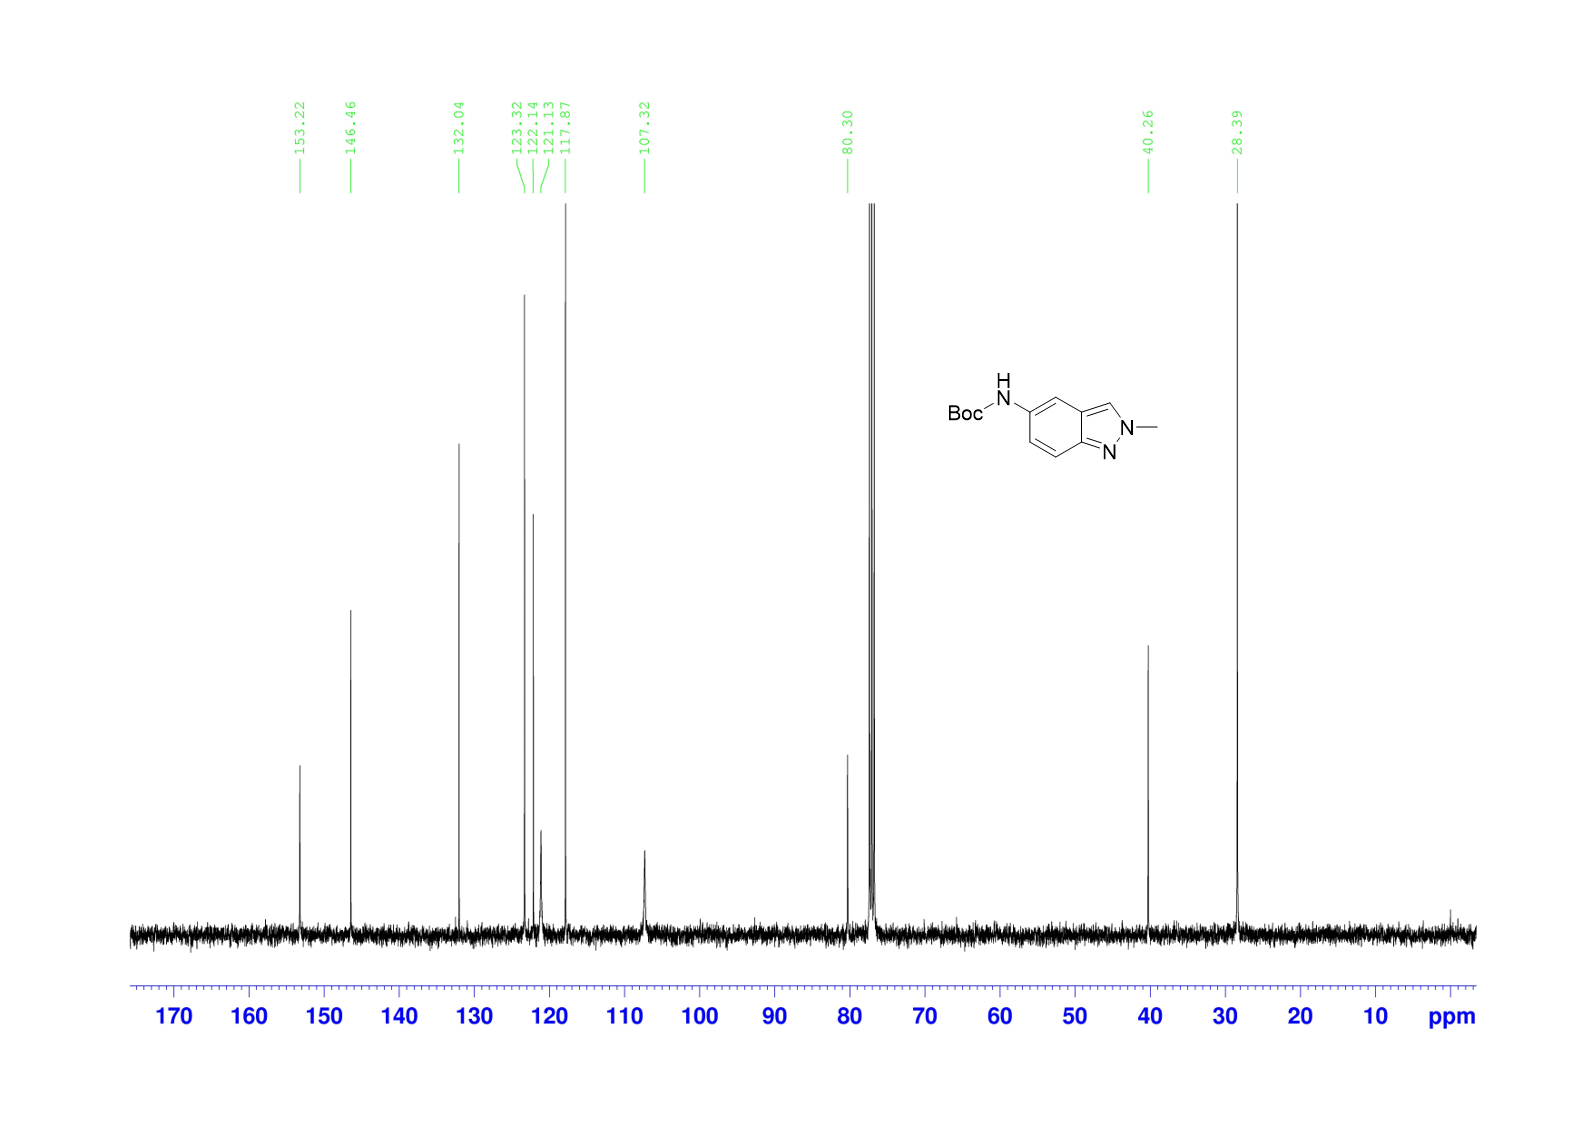


**Supplementary Fig. 17.** 13C NMR spectrum of **IN-Boc** in CDCl3


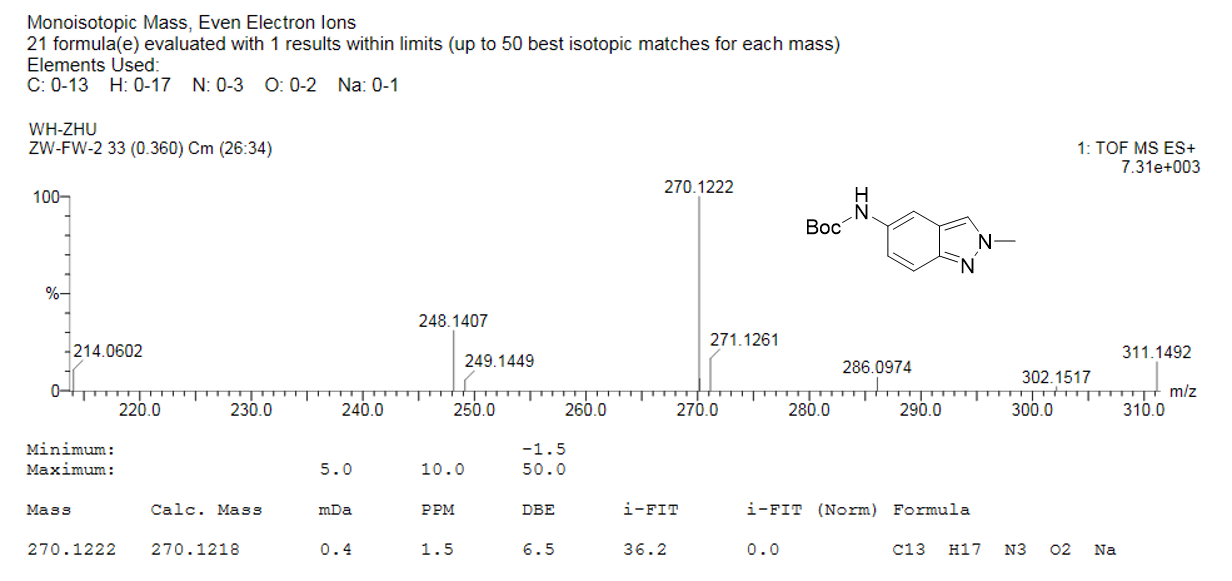


**Supplementary Fig. 18.** HRMS spectrum of **IN-Boc**


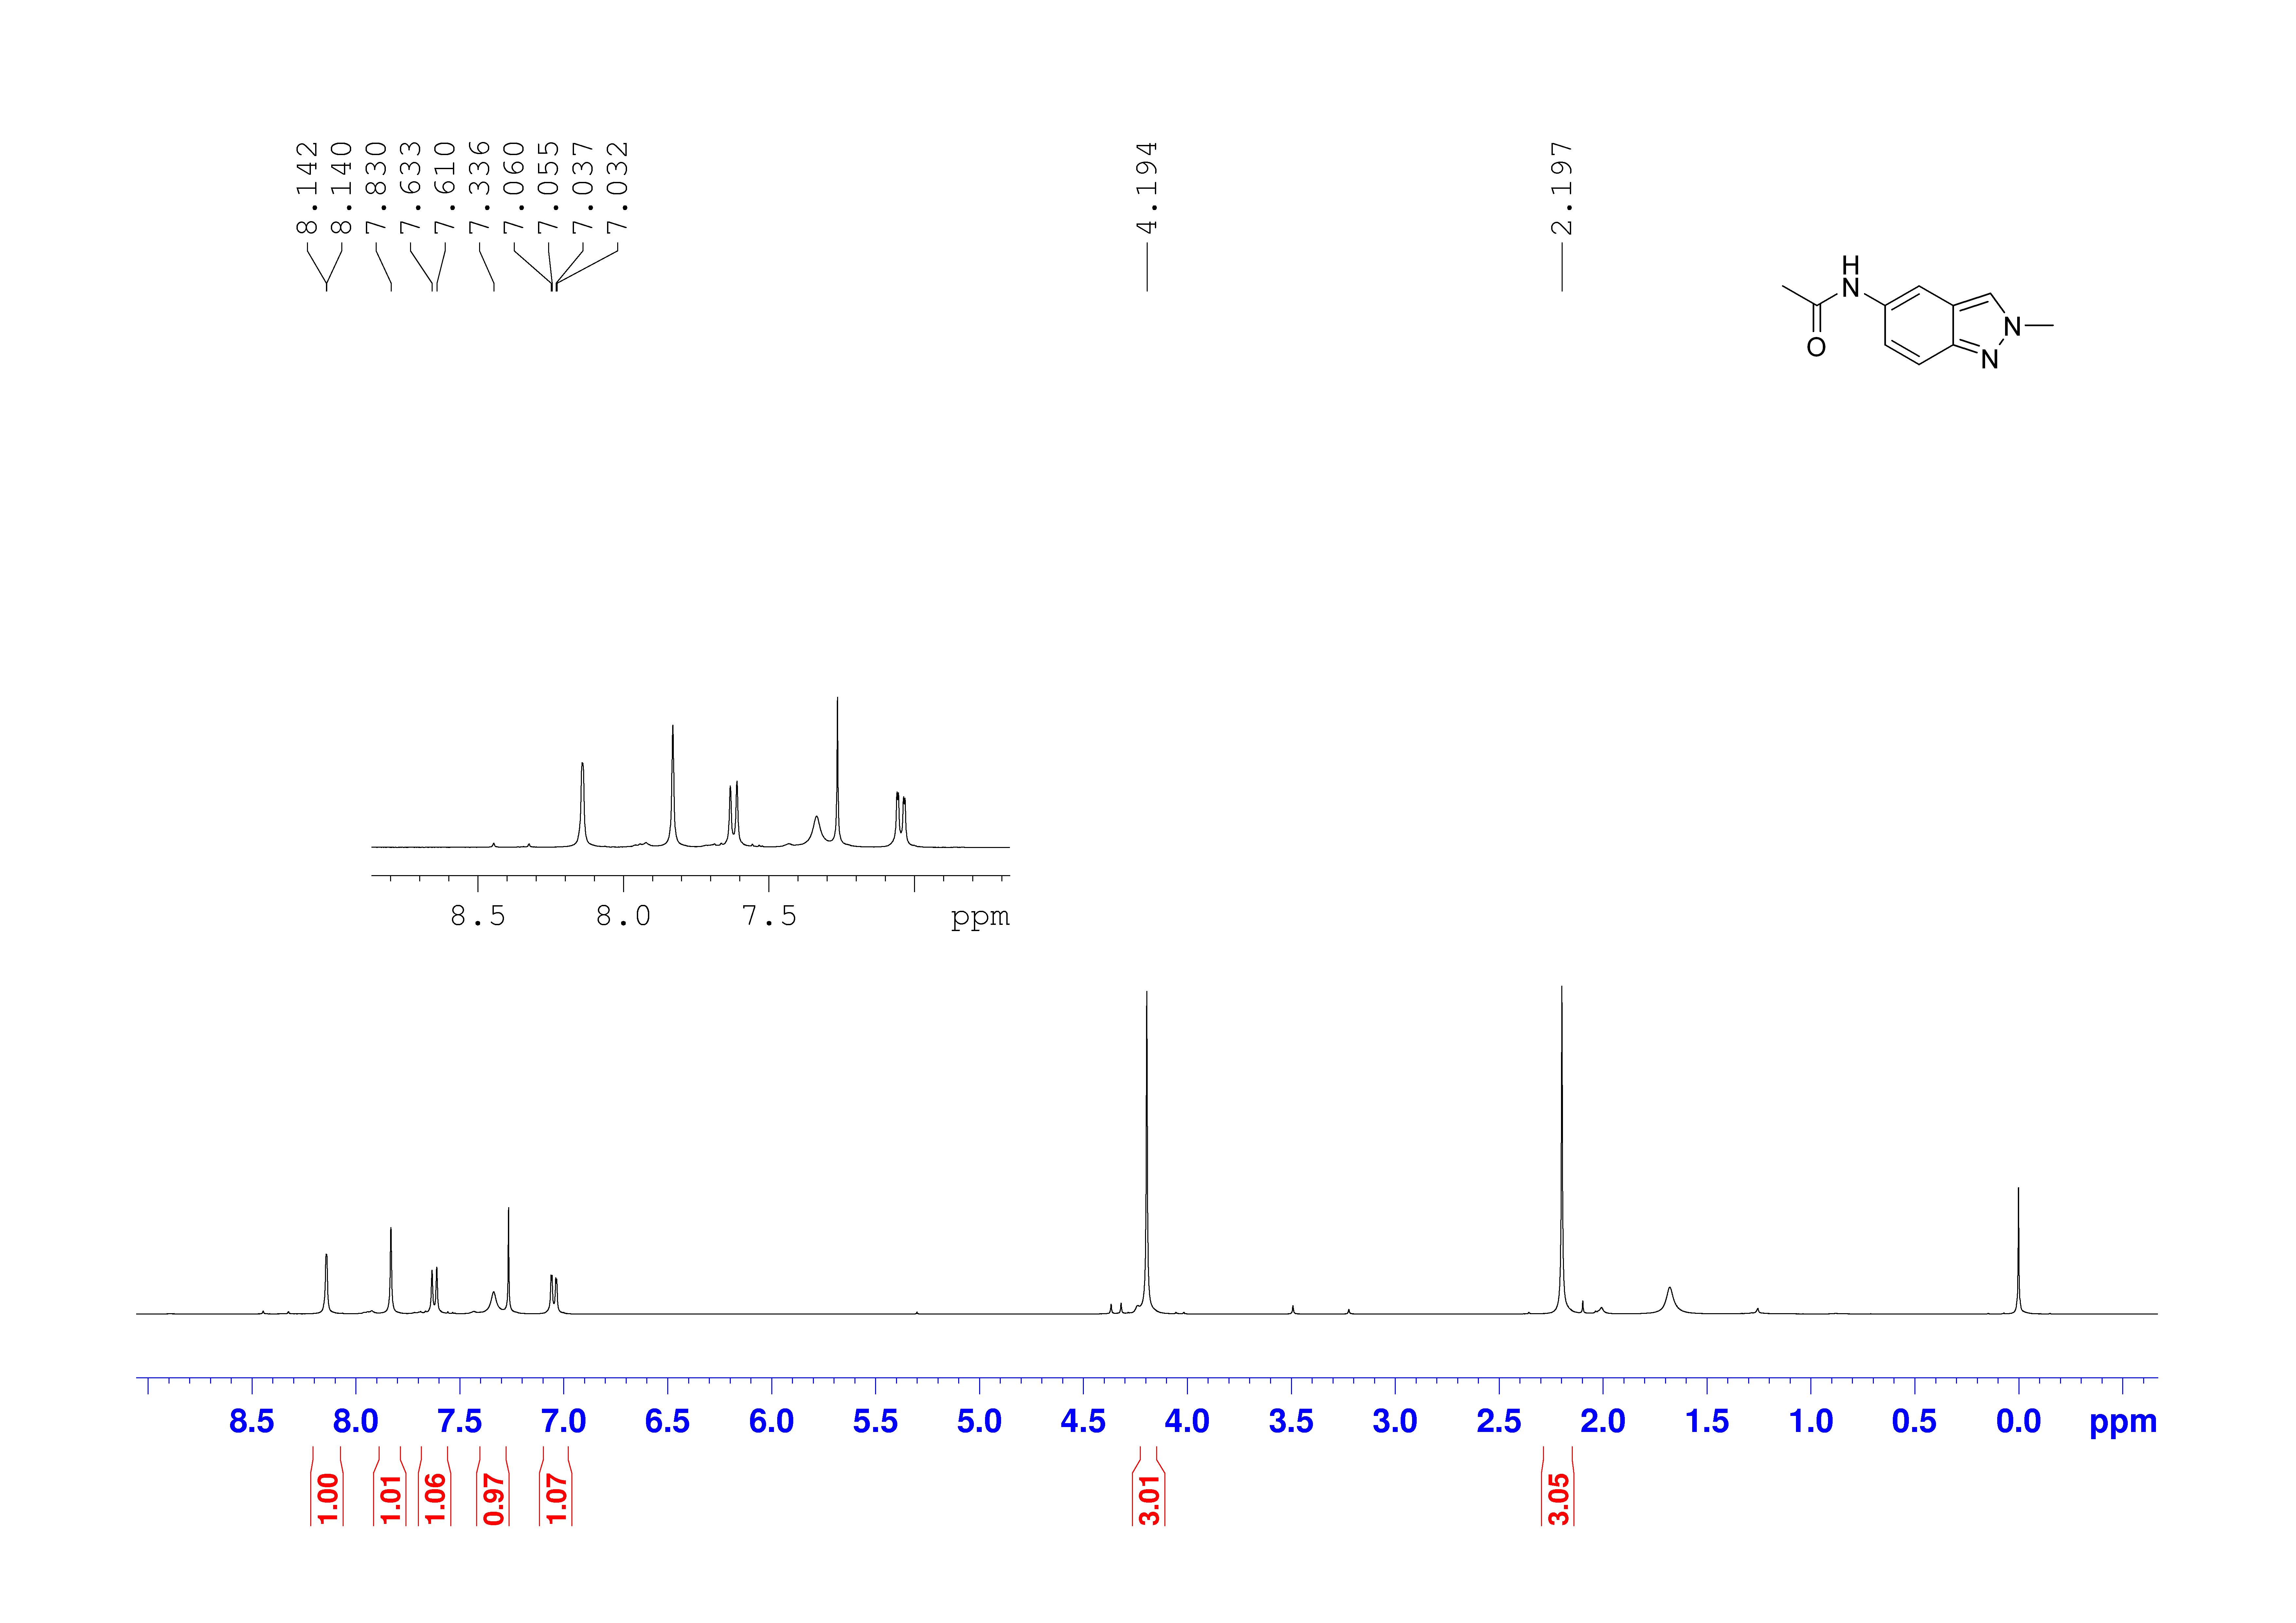


**Supplementary Fig. 19.** 1H NMR spectrum of **IN-Ac** in CDCl3


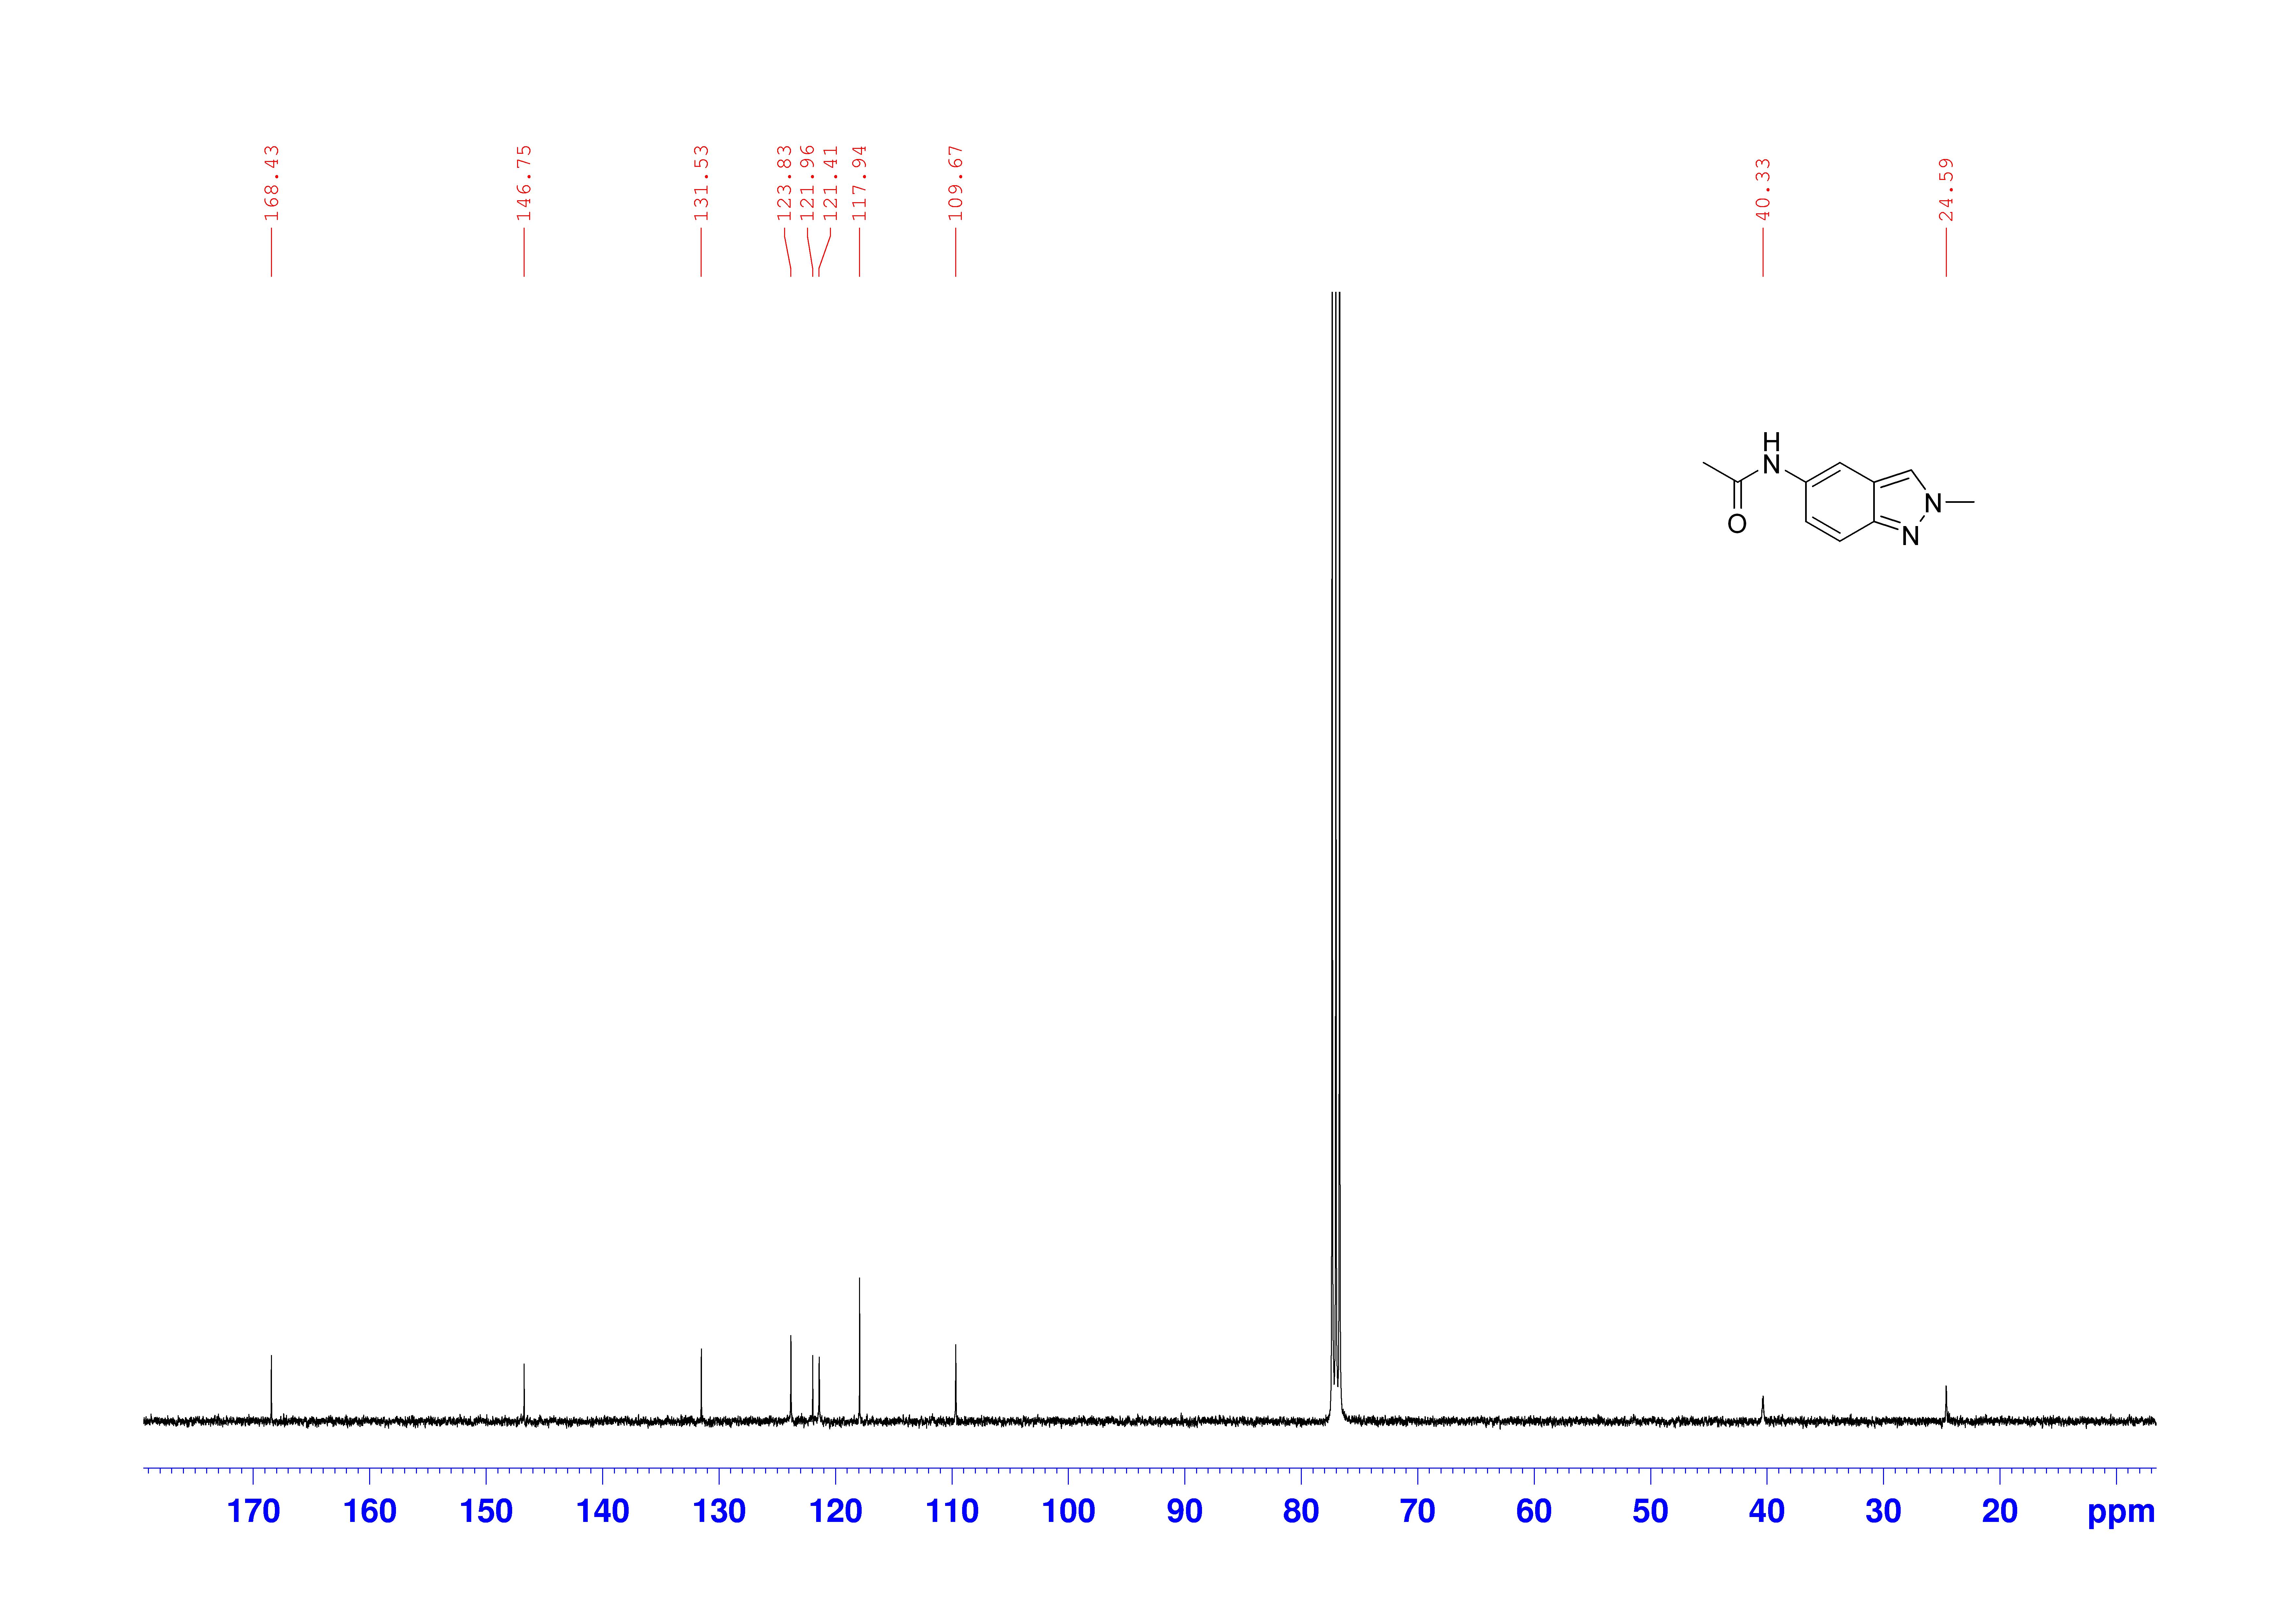


**Supplementary Fig. 20.** 13C NMR spectrum of **IN-Ac** in CDCl3


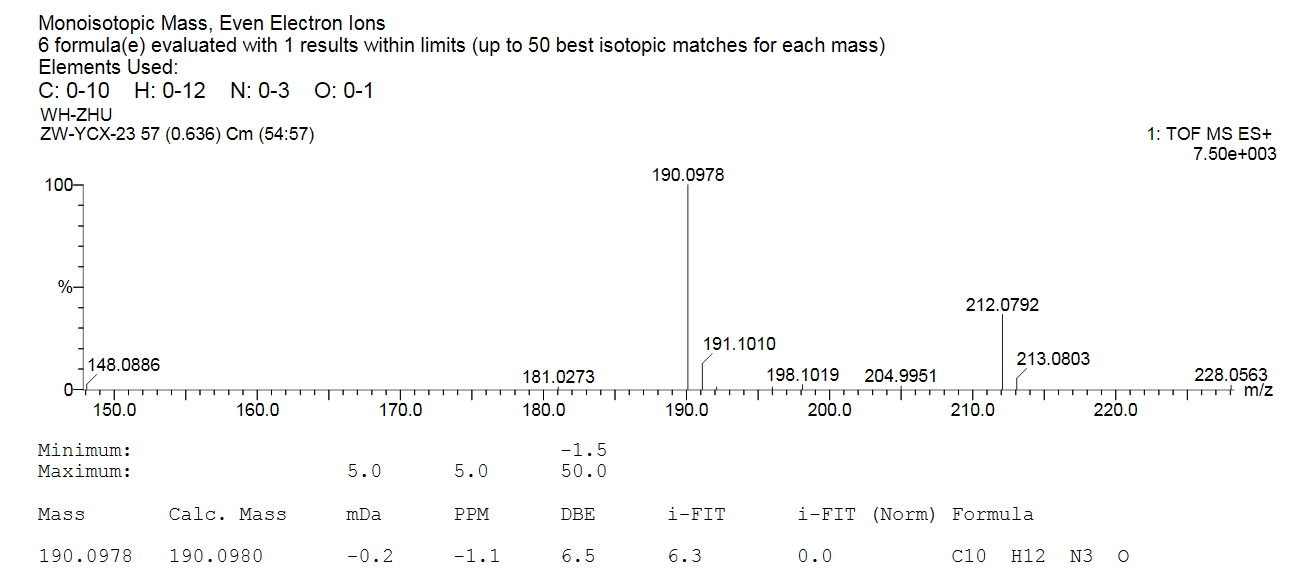


**Supplementary Fig. 21.** HRMS spectrum of **IN-Ac**


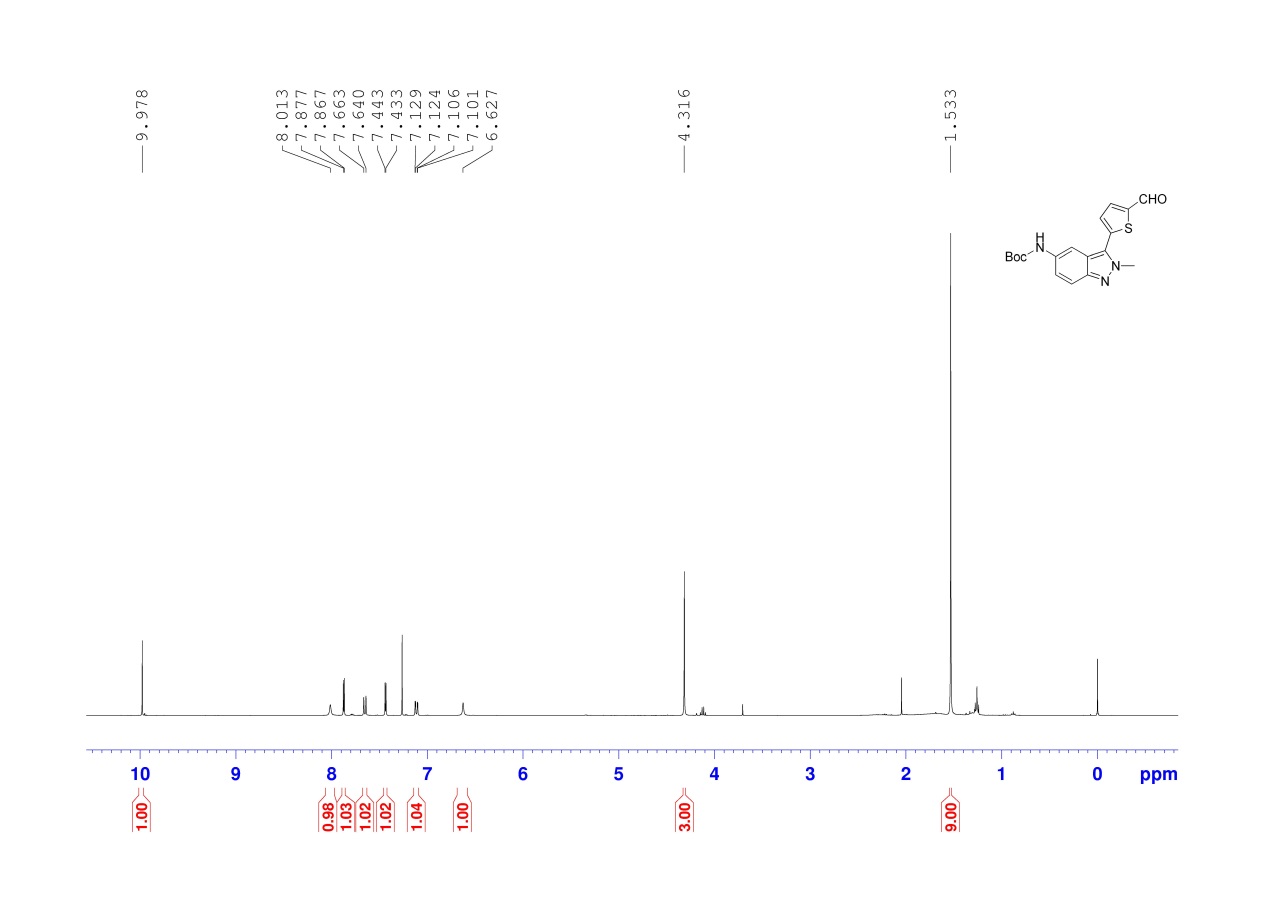


**Supplementary Fig. 22.** 1H NMR spectrum of **AL-SIN-Boc** in CDCl3


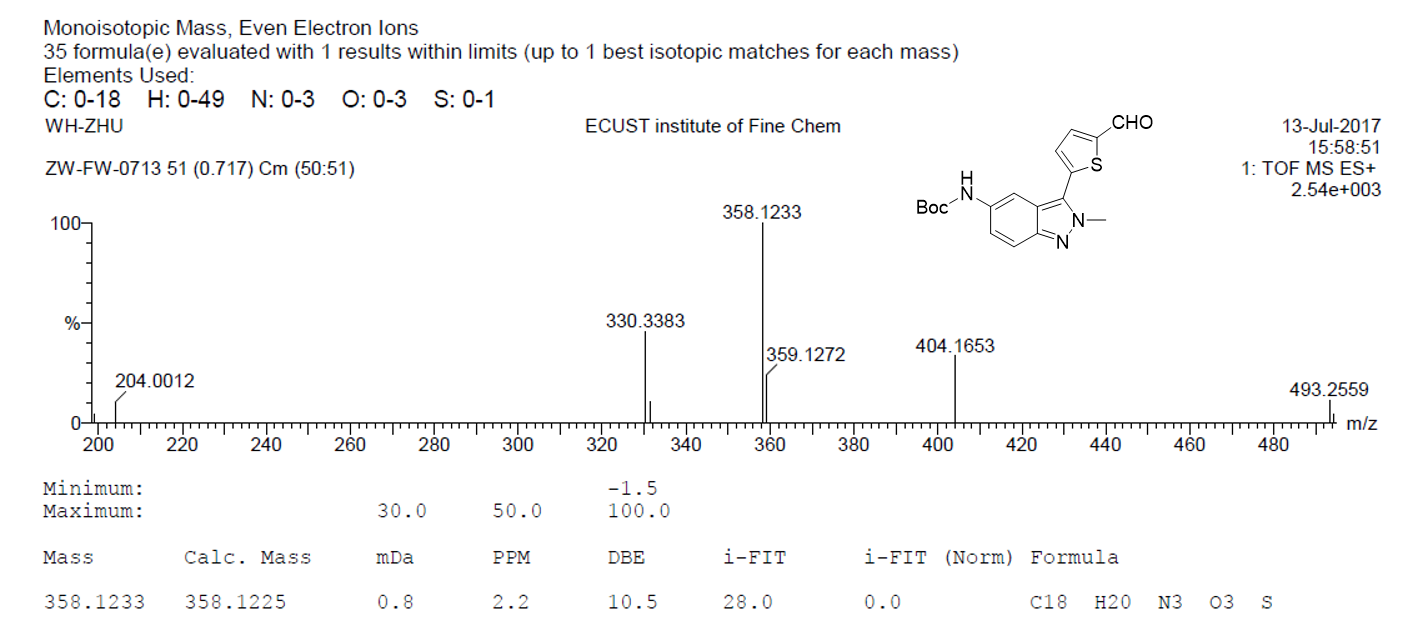


**Supplementary Fig. 23.** HRMS spectrum of **AL-SIN-Boc**


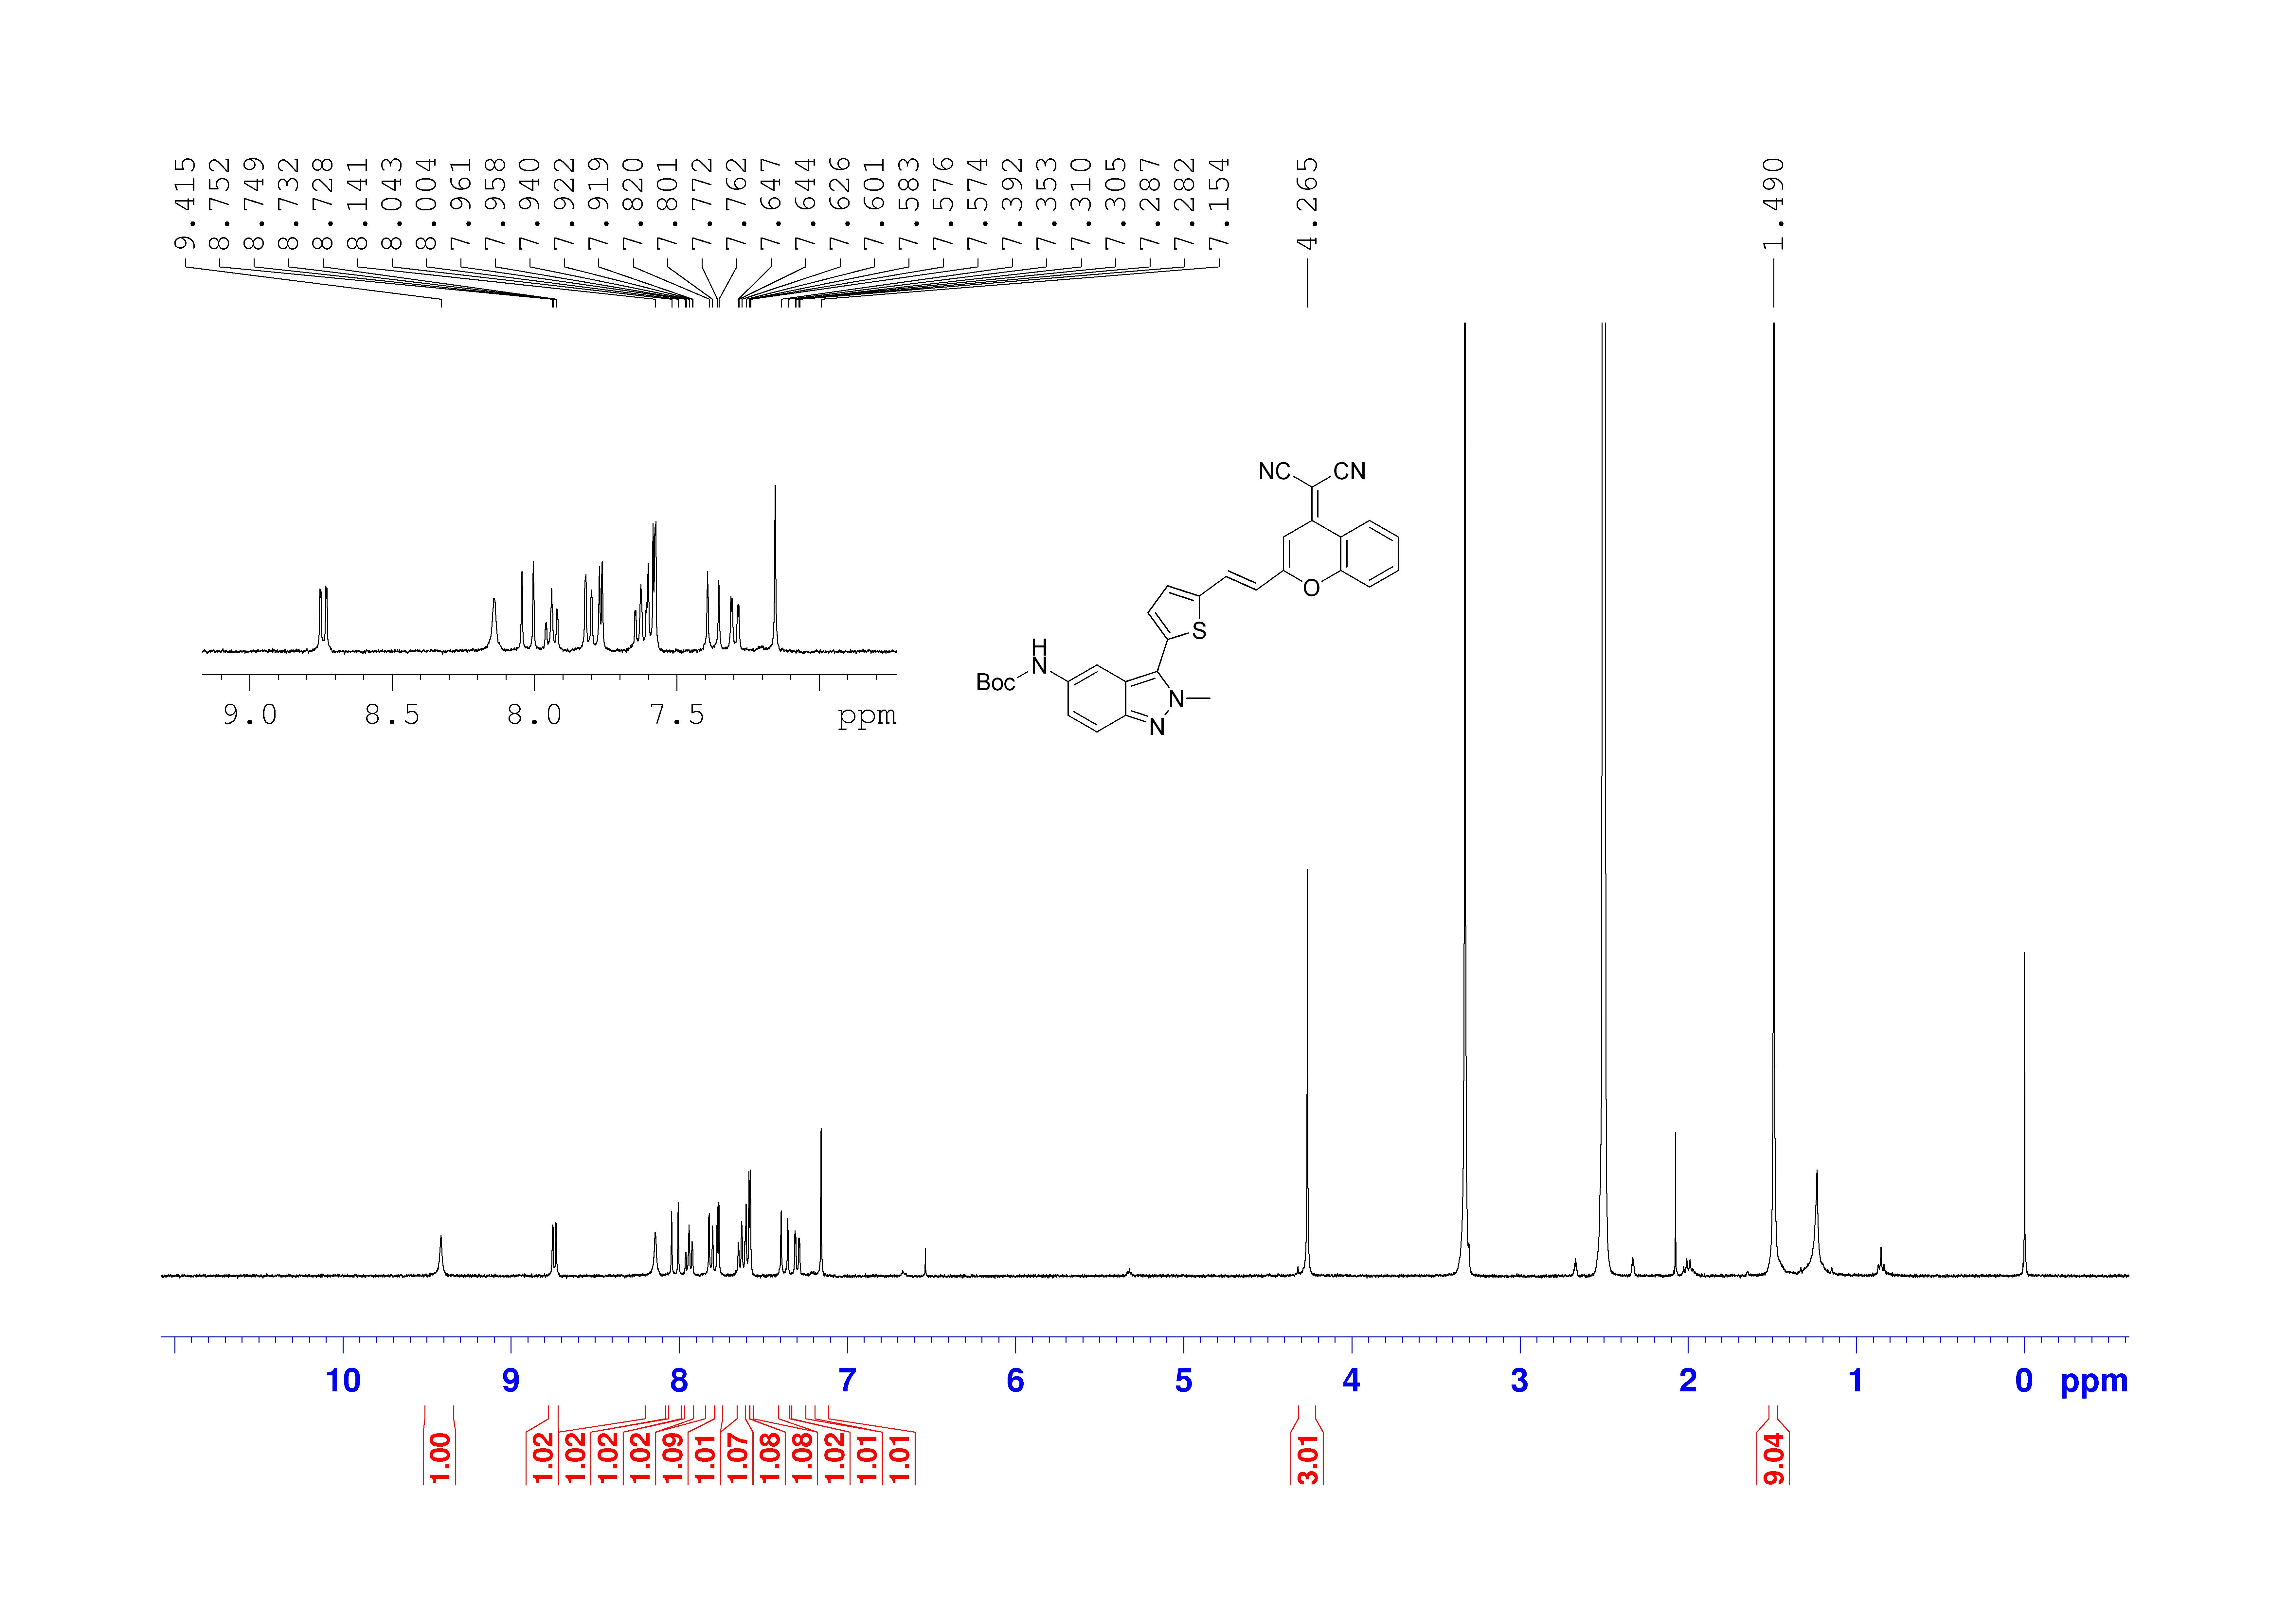


**Supplementary Fig. 24.** 1H NMR spectrum of **DCM-SIN-Boc** in DMSO-*d*6


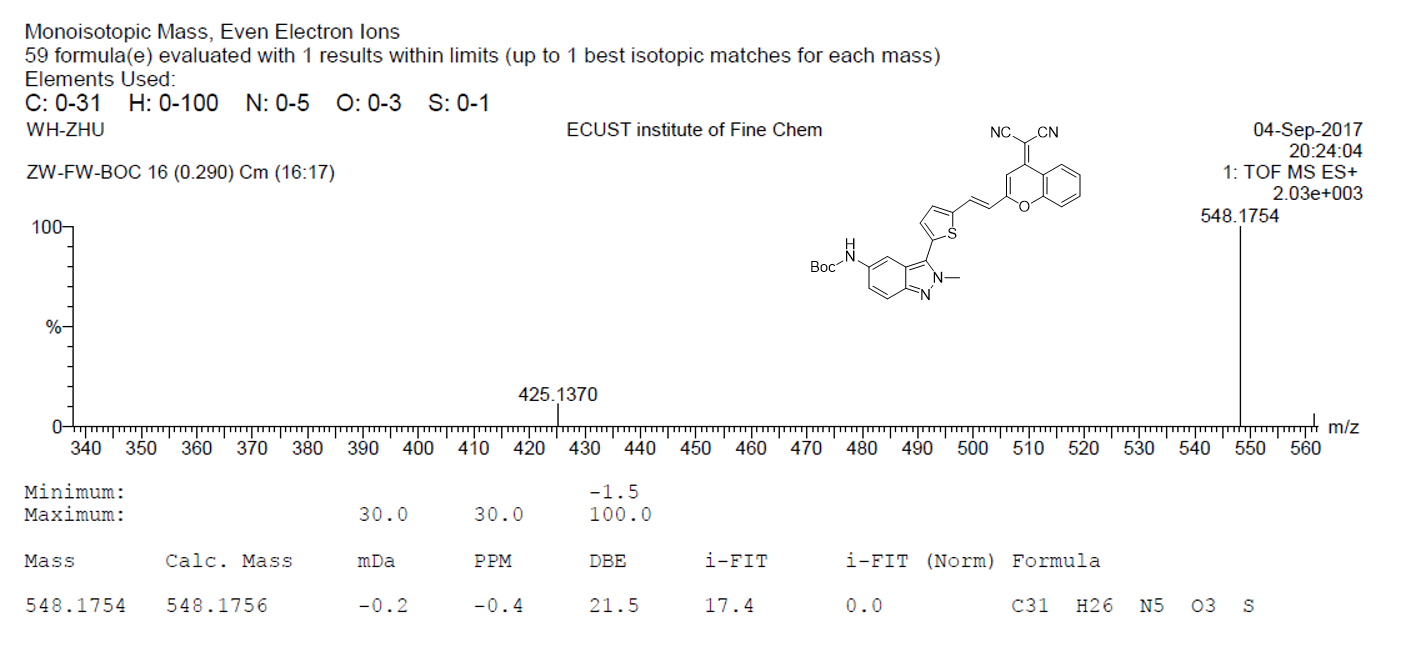


**Supplementary Fig. 25.** HRMS spectrum of **DCM-SIN-Boc**


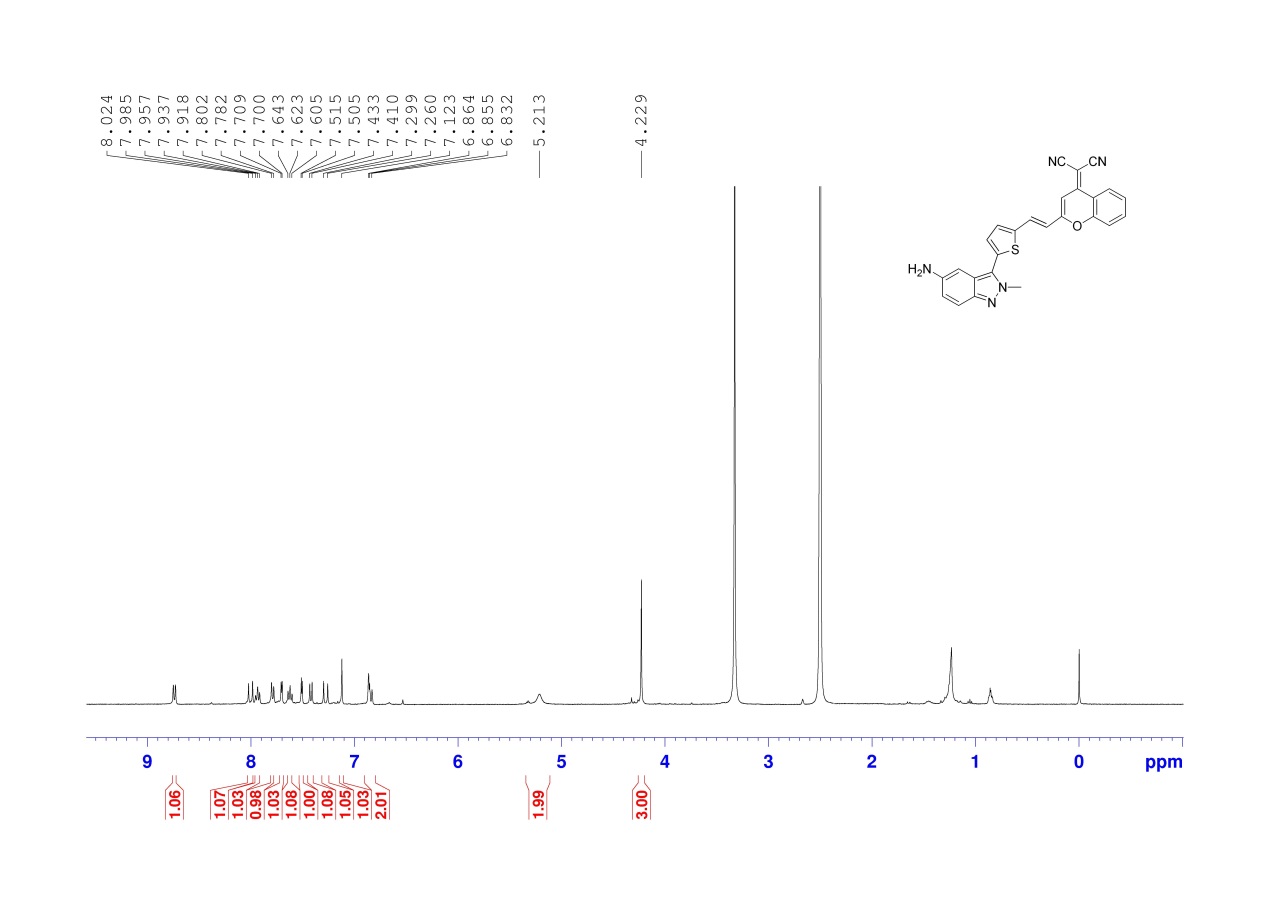


**Supplementary Fig. 26.** 1H NMR spectrum of **DCM-SIN-NH2** in DMSO-*d*6


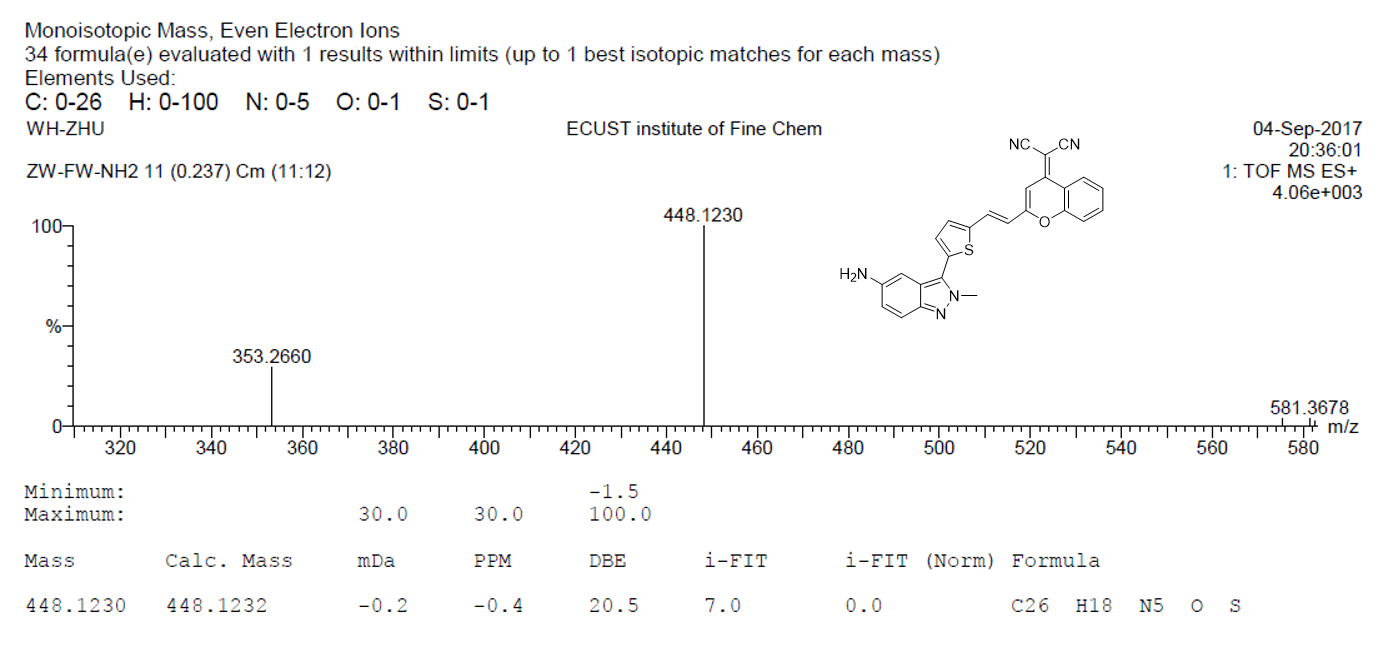


**Supplementary Fig. 27.** HRMS spectrum of **DCM-SIN-NH2**


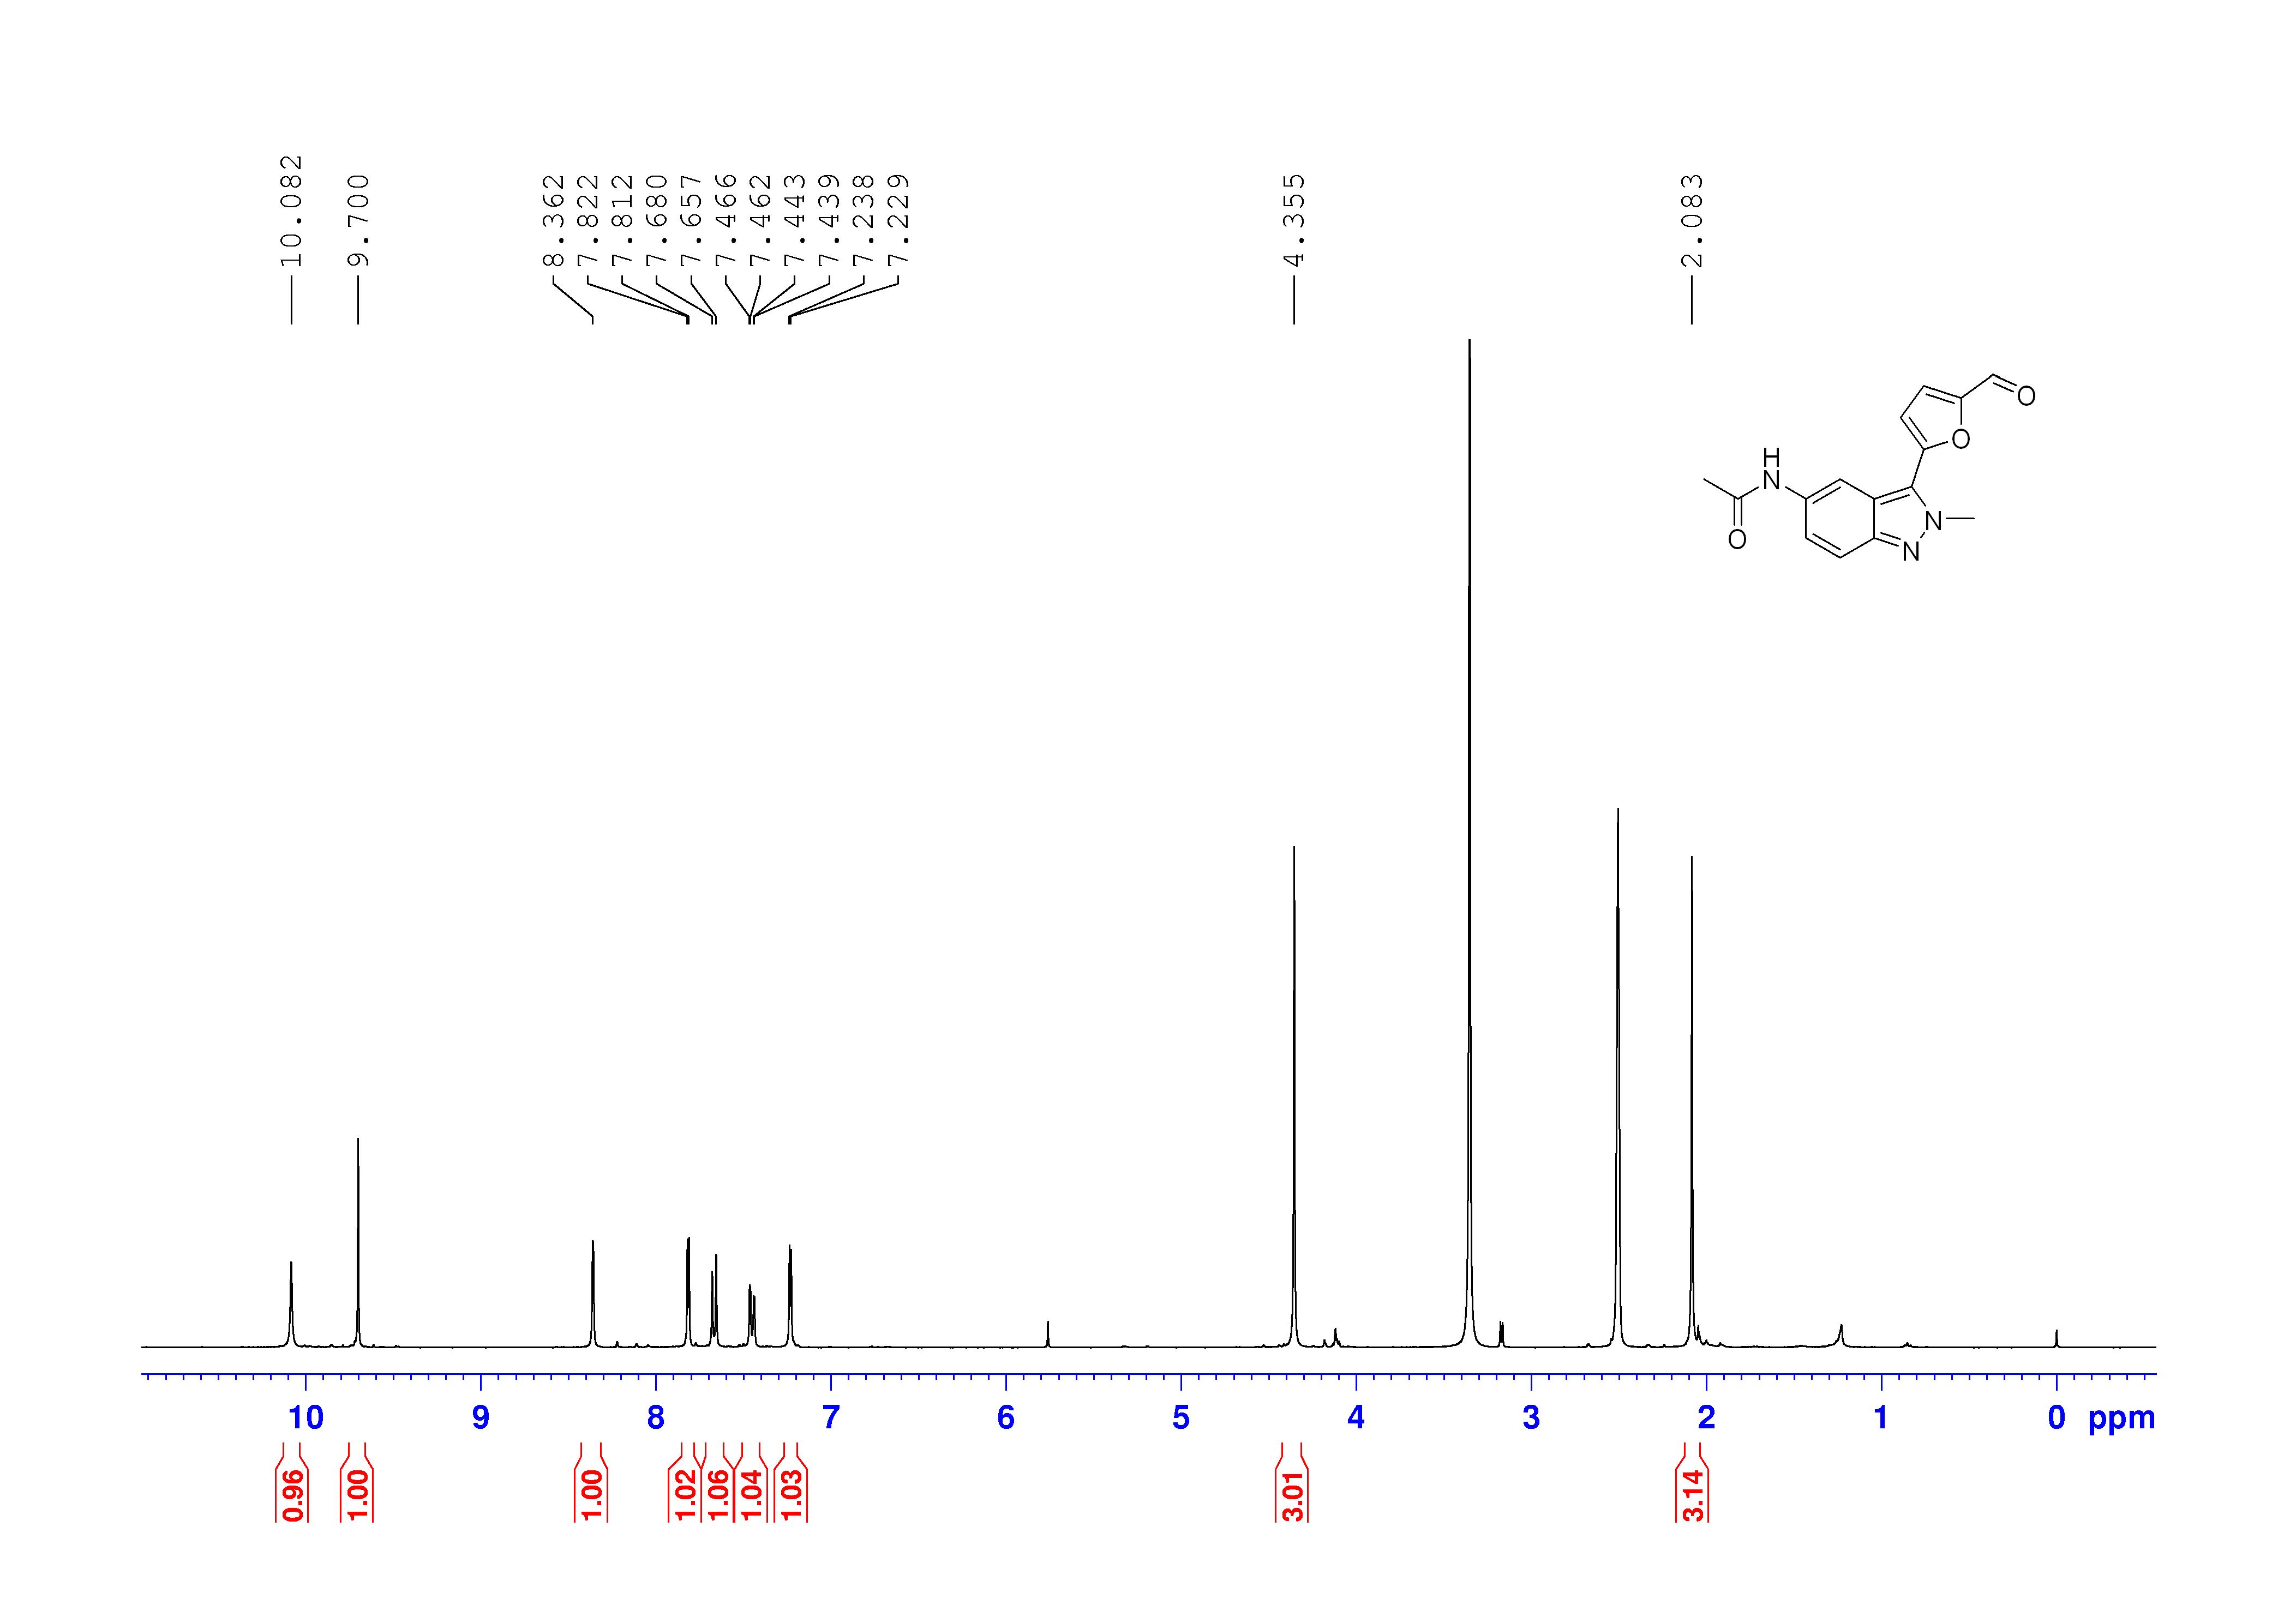


**Supplementary Fig. 28.** 1H NMR spectrum of **AL-IN-Ac** in DMSO-*d*6


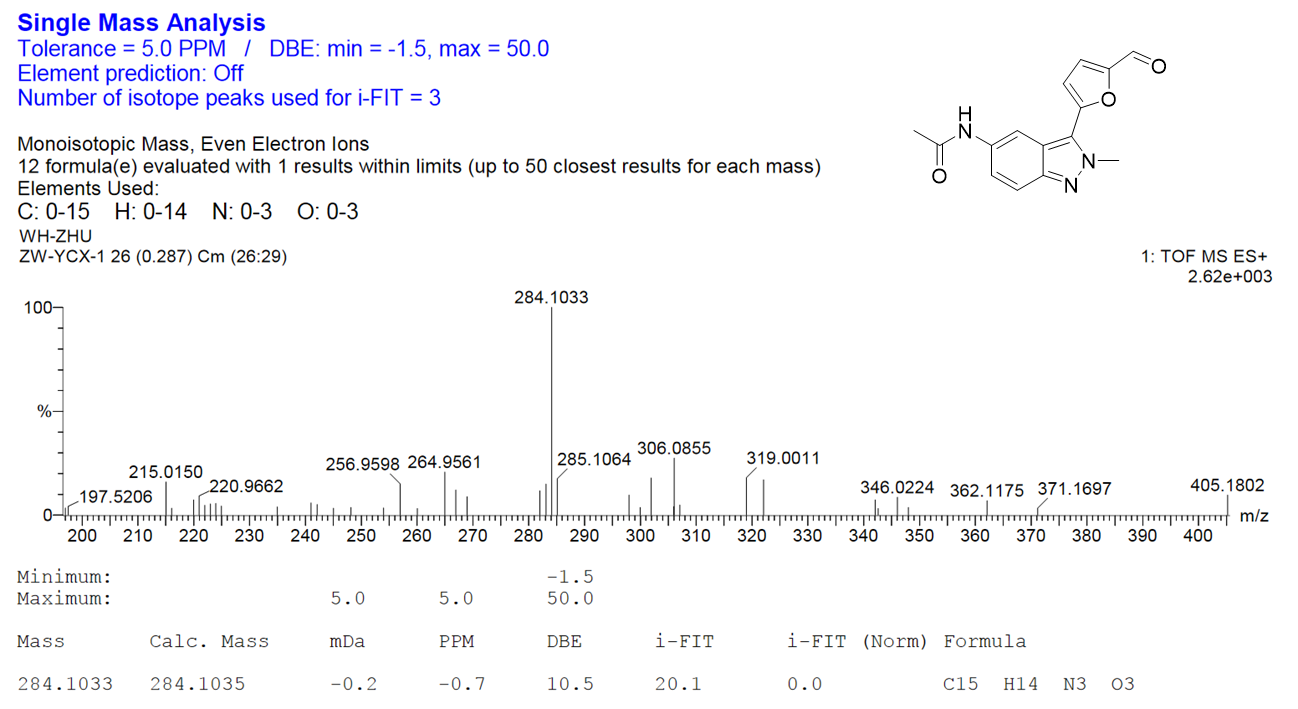


**Supplementary Fig. 29.** HRMS spectrum of **AL-IN-Ac**


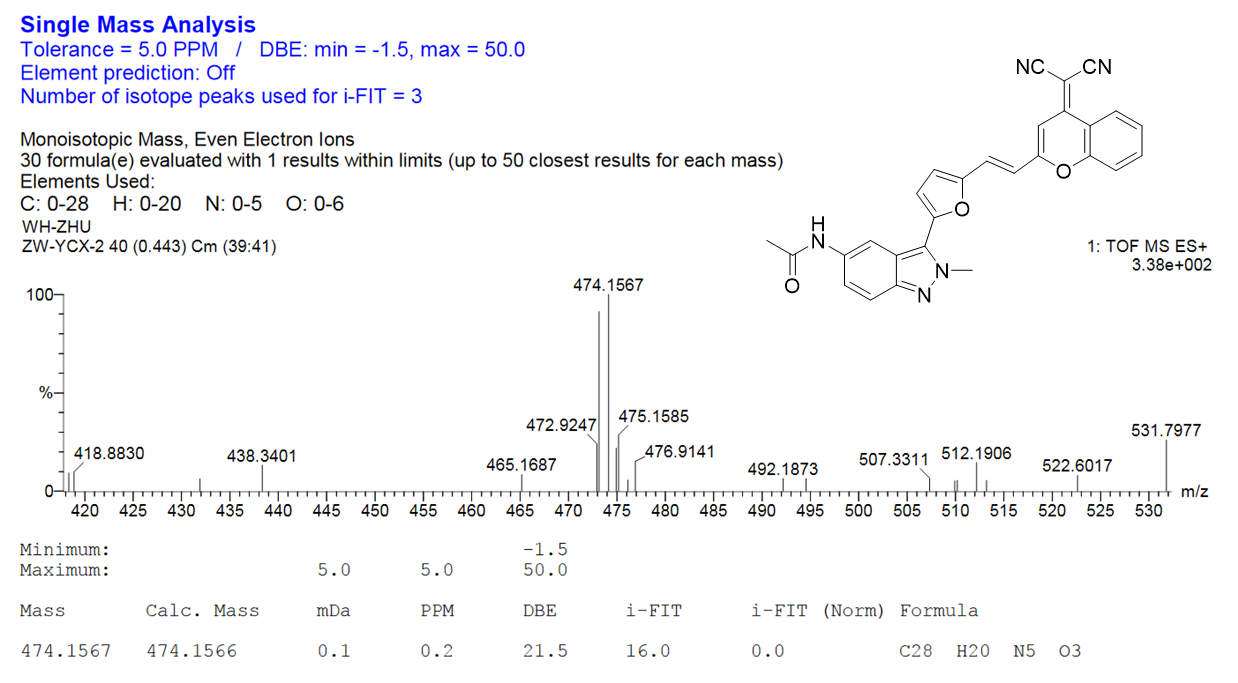


**Supplementary Fig. 30.** HRMS spectrum of **DCM-IN-Ac**


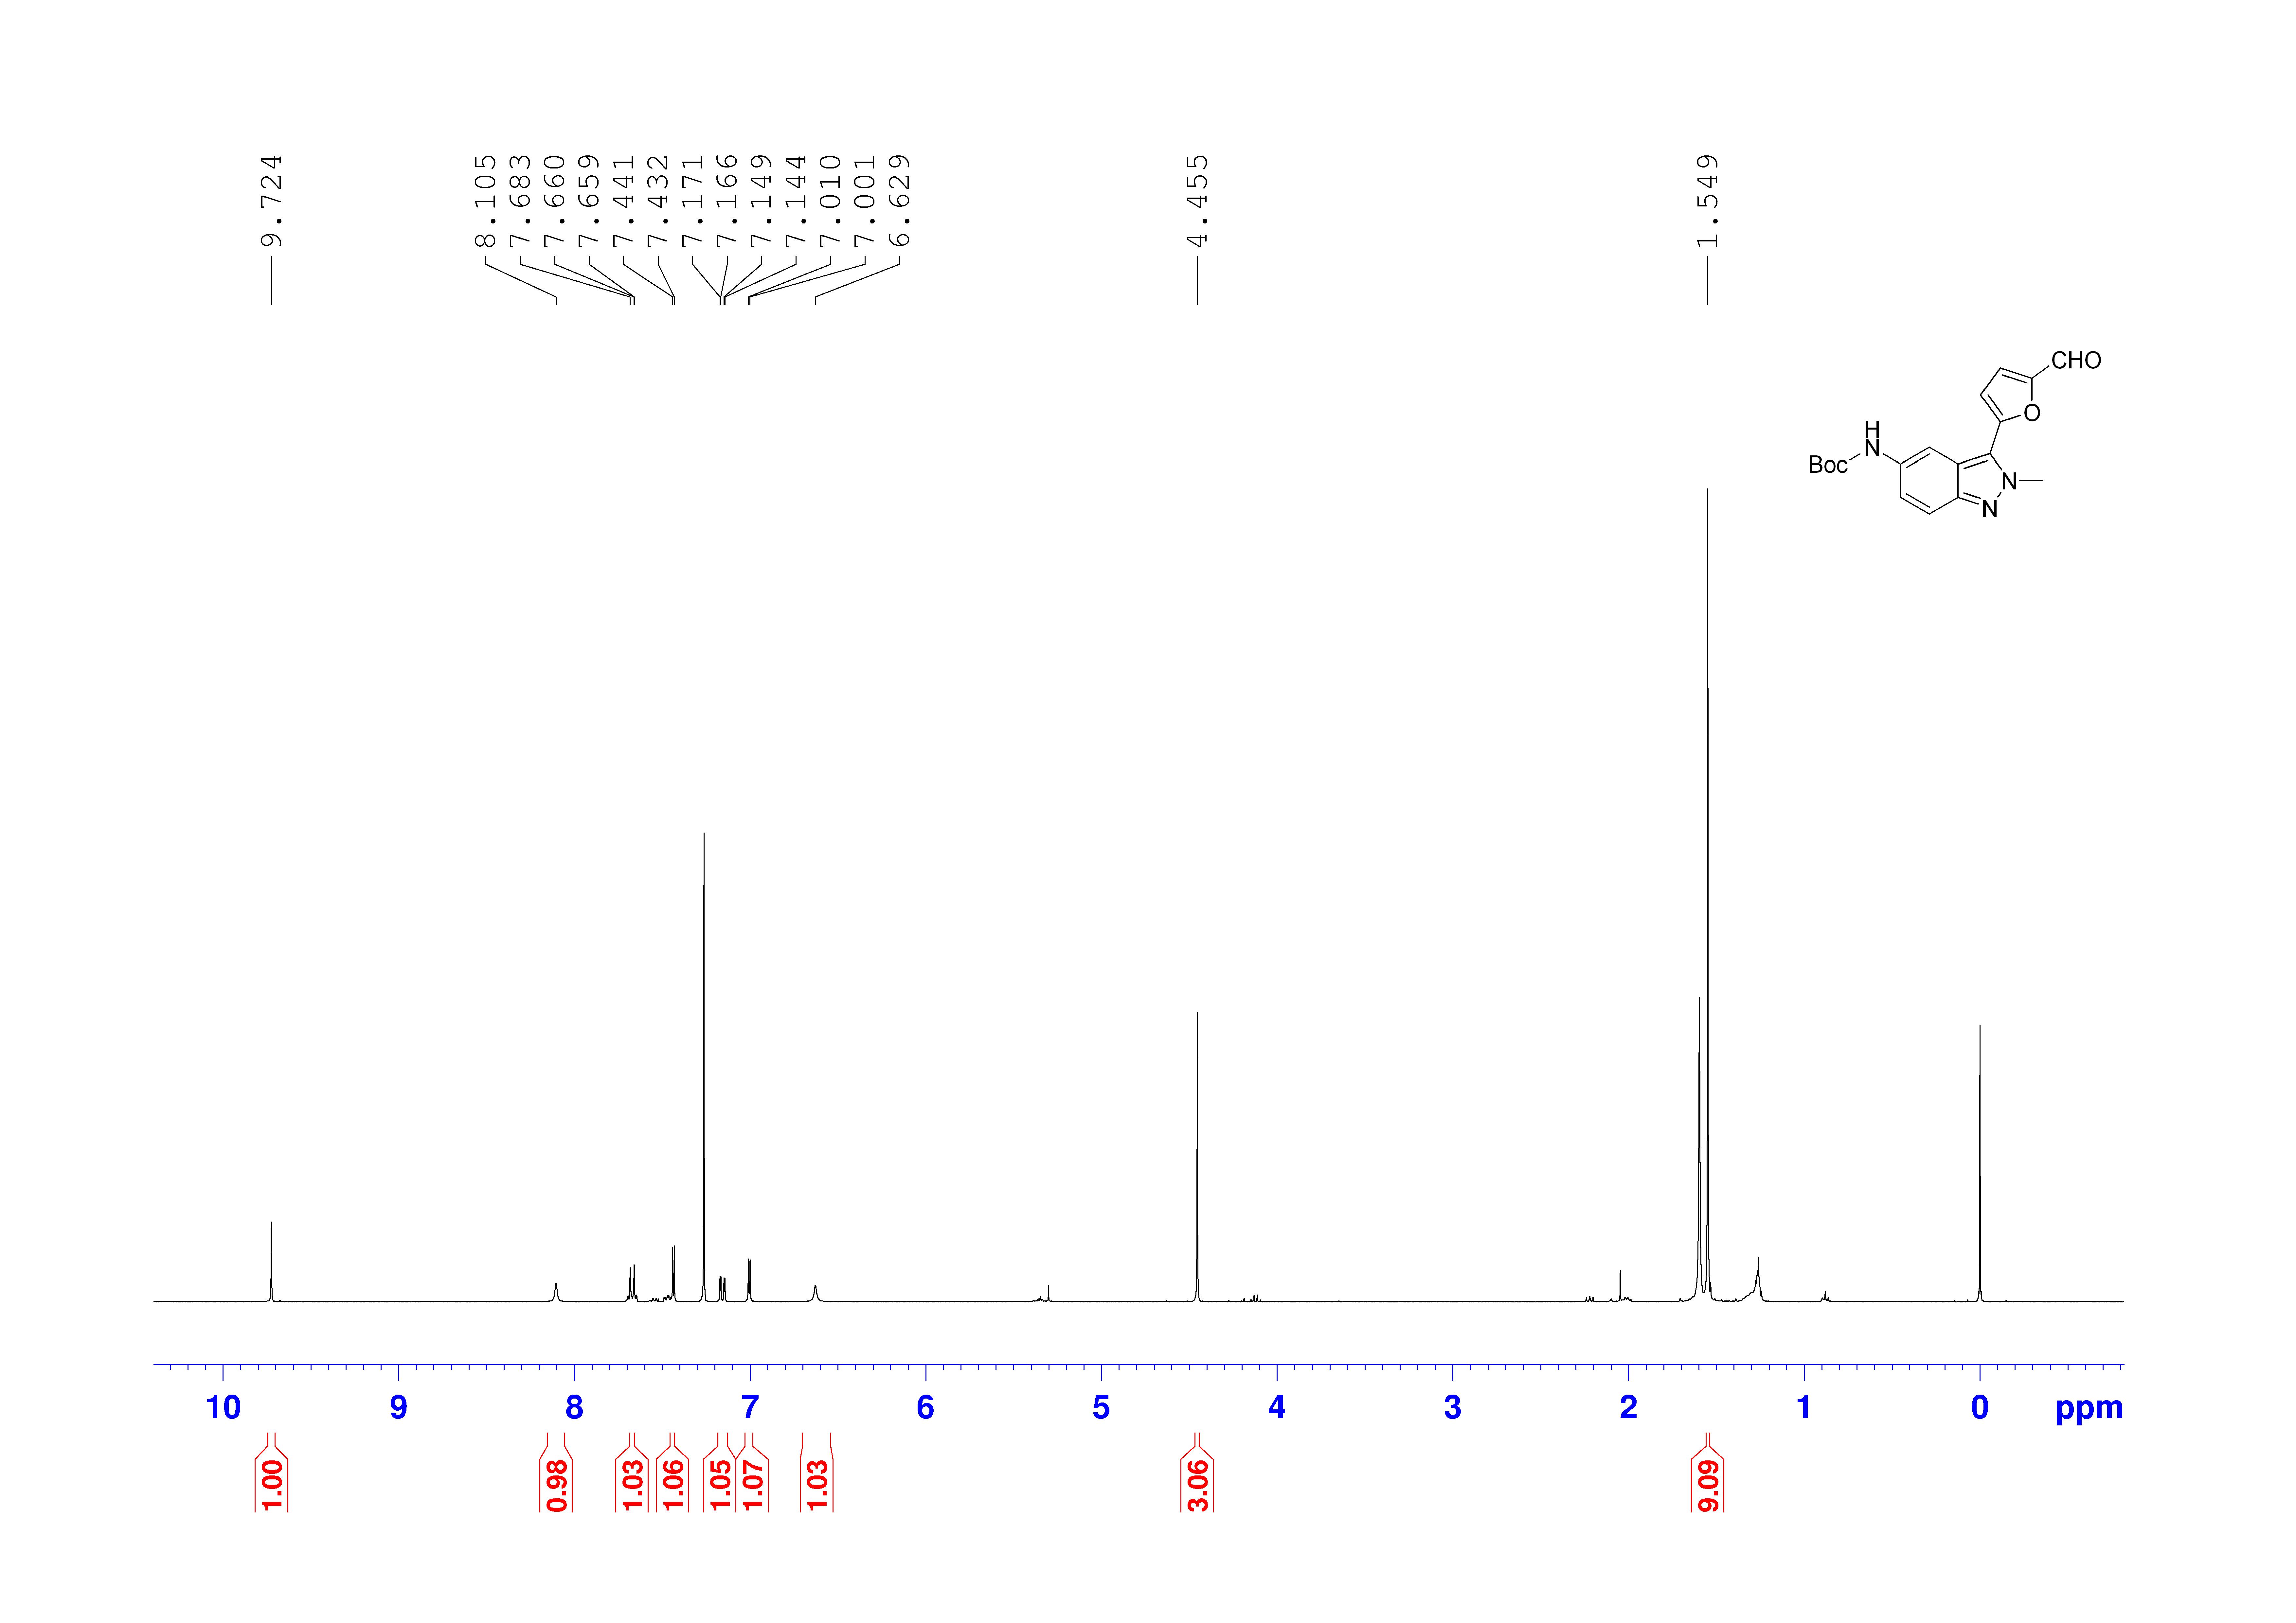


**Supplementary Fig. 31.** 1H NMR spectrum of **AL-IN-Boc** in CDCl3


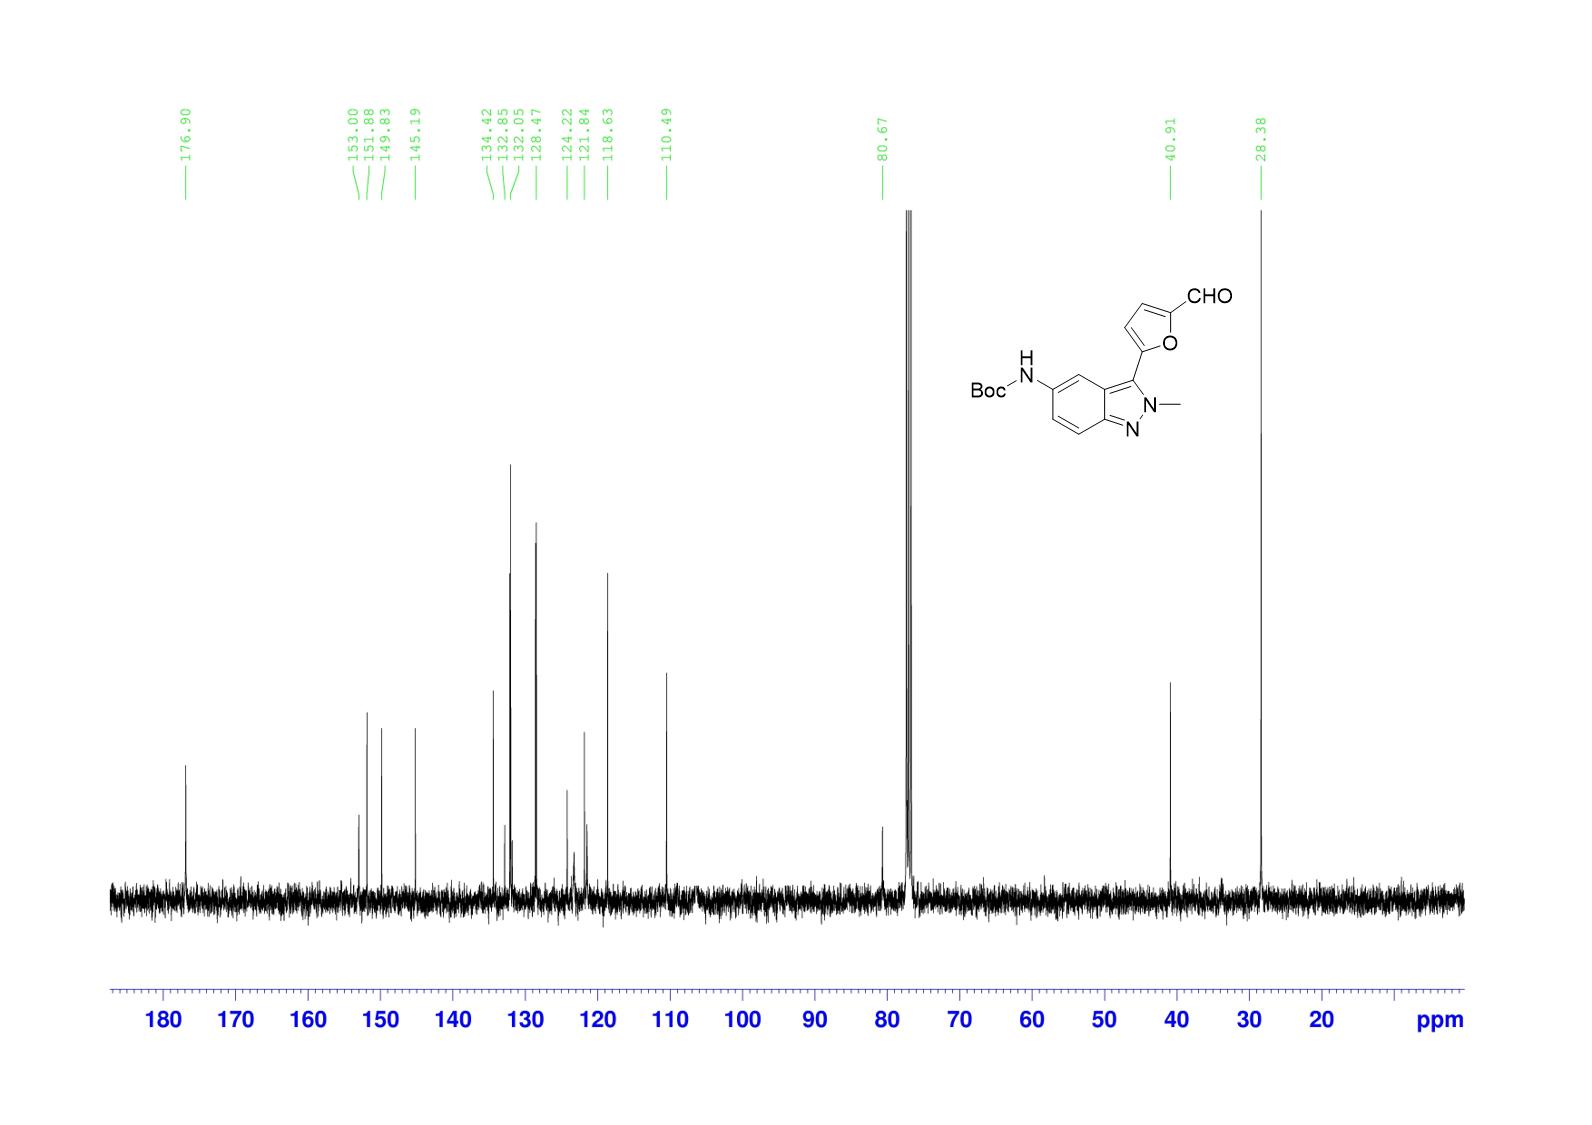


**Supplementary Fig. 32.** 13C NMR spectrum of **AL-IN-Boc** in CDCl3


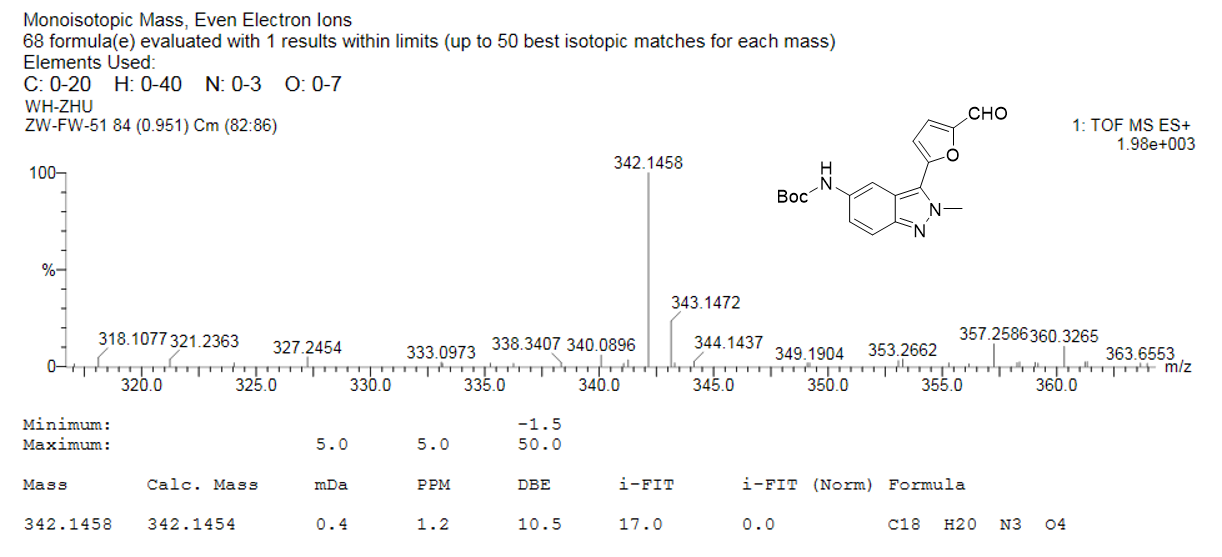


**Supplementary Fig. 33.** HRMS spectrum of **AL-IN-Boc**


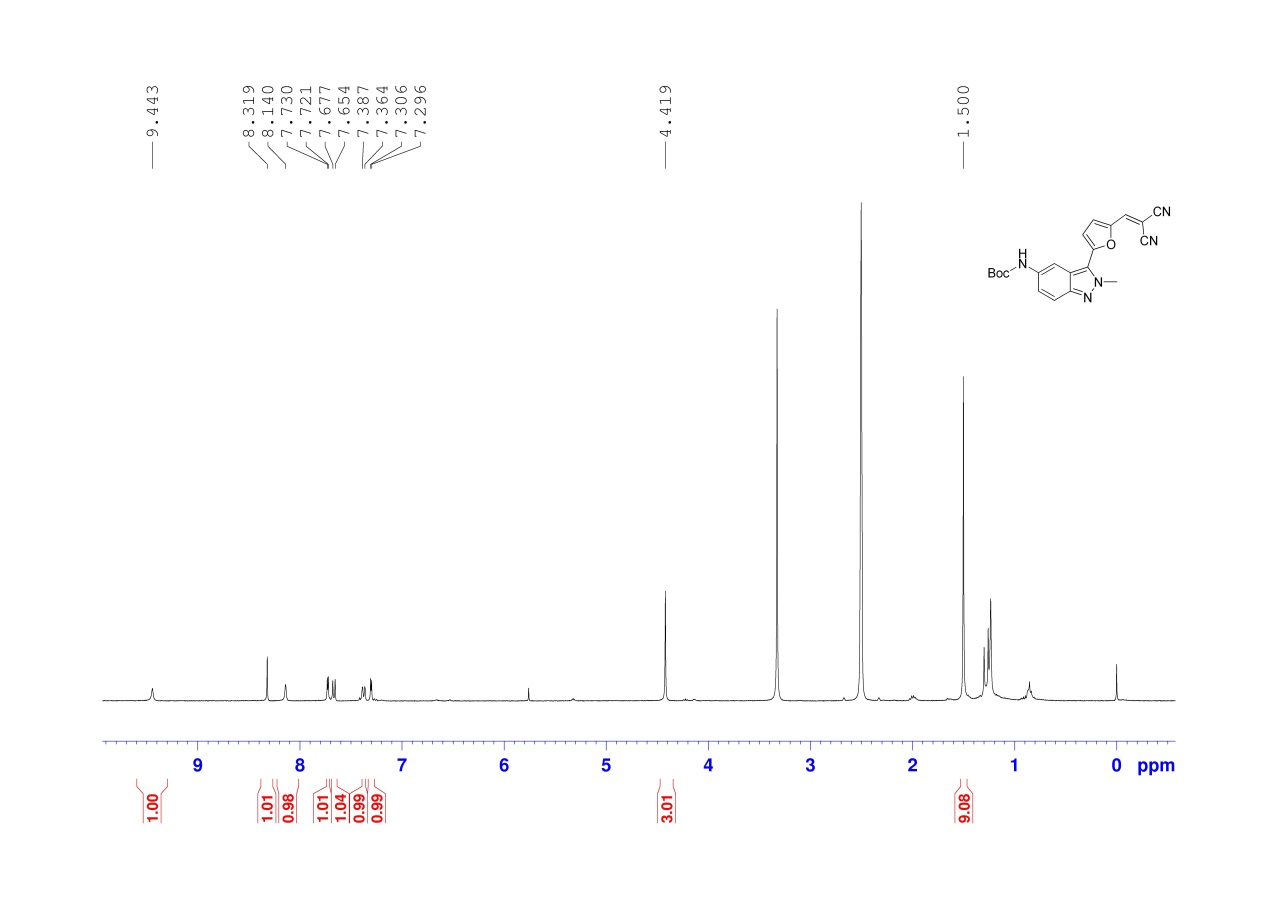


**Supplementary Fig. 34.** 1H NMR spectrum of compound **DC-IN-Boc** in DMSO-*d*6


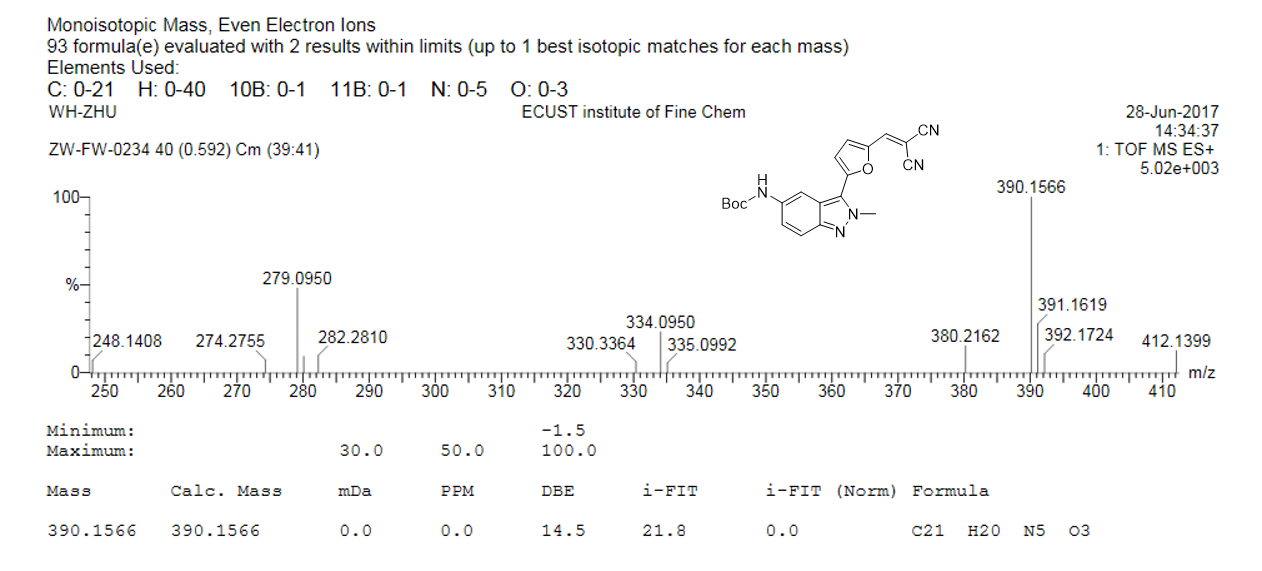


**Supplementary Fig. 35.** 13C NMR spectrum of compound **DC-IN-Boc** in CDCl3


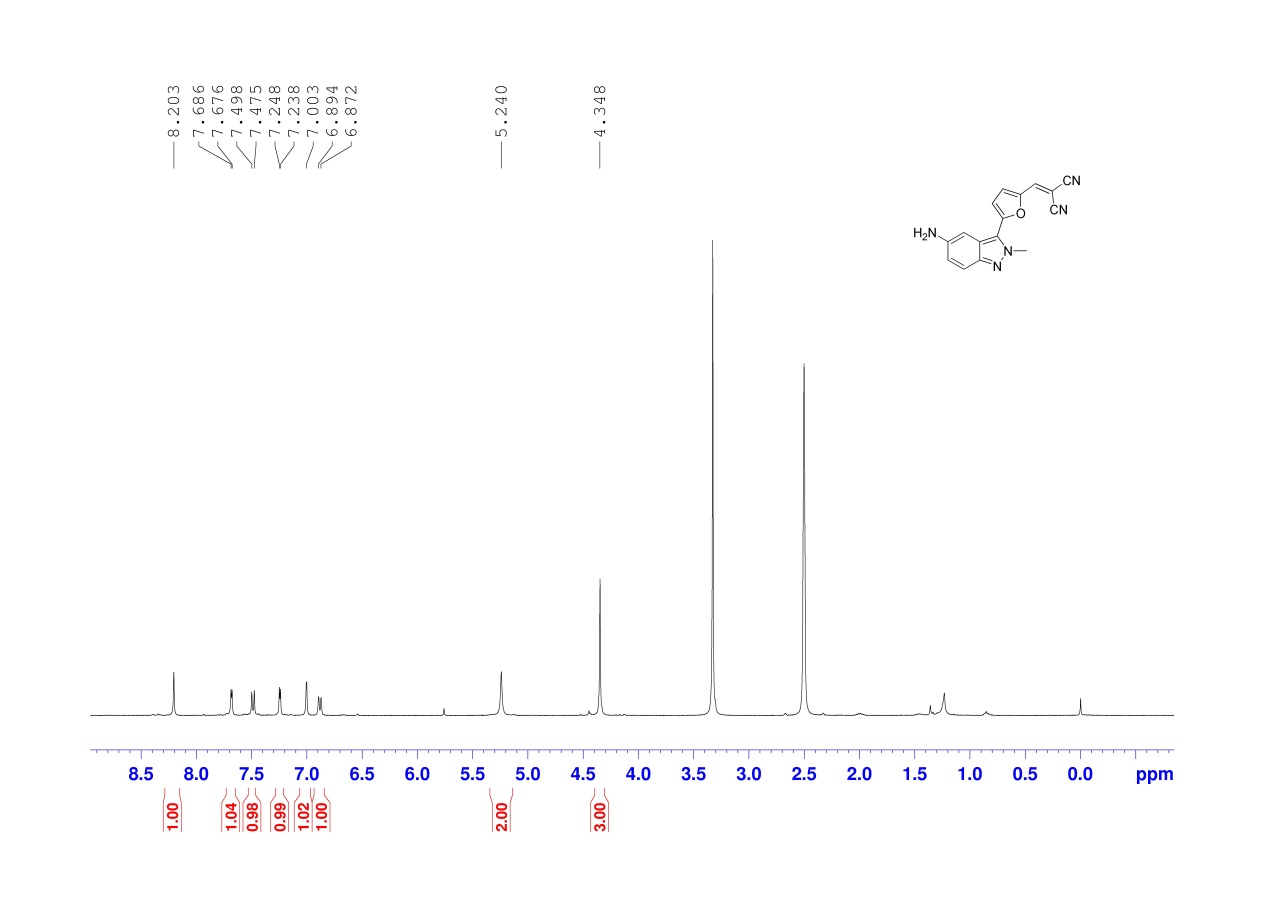


**Supplementary Fig. 36.** 1H NMR spectrum of **DC-IN-NH2** in DMSO-*d*6


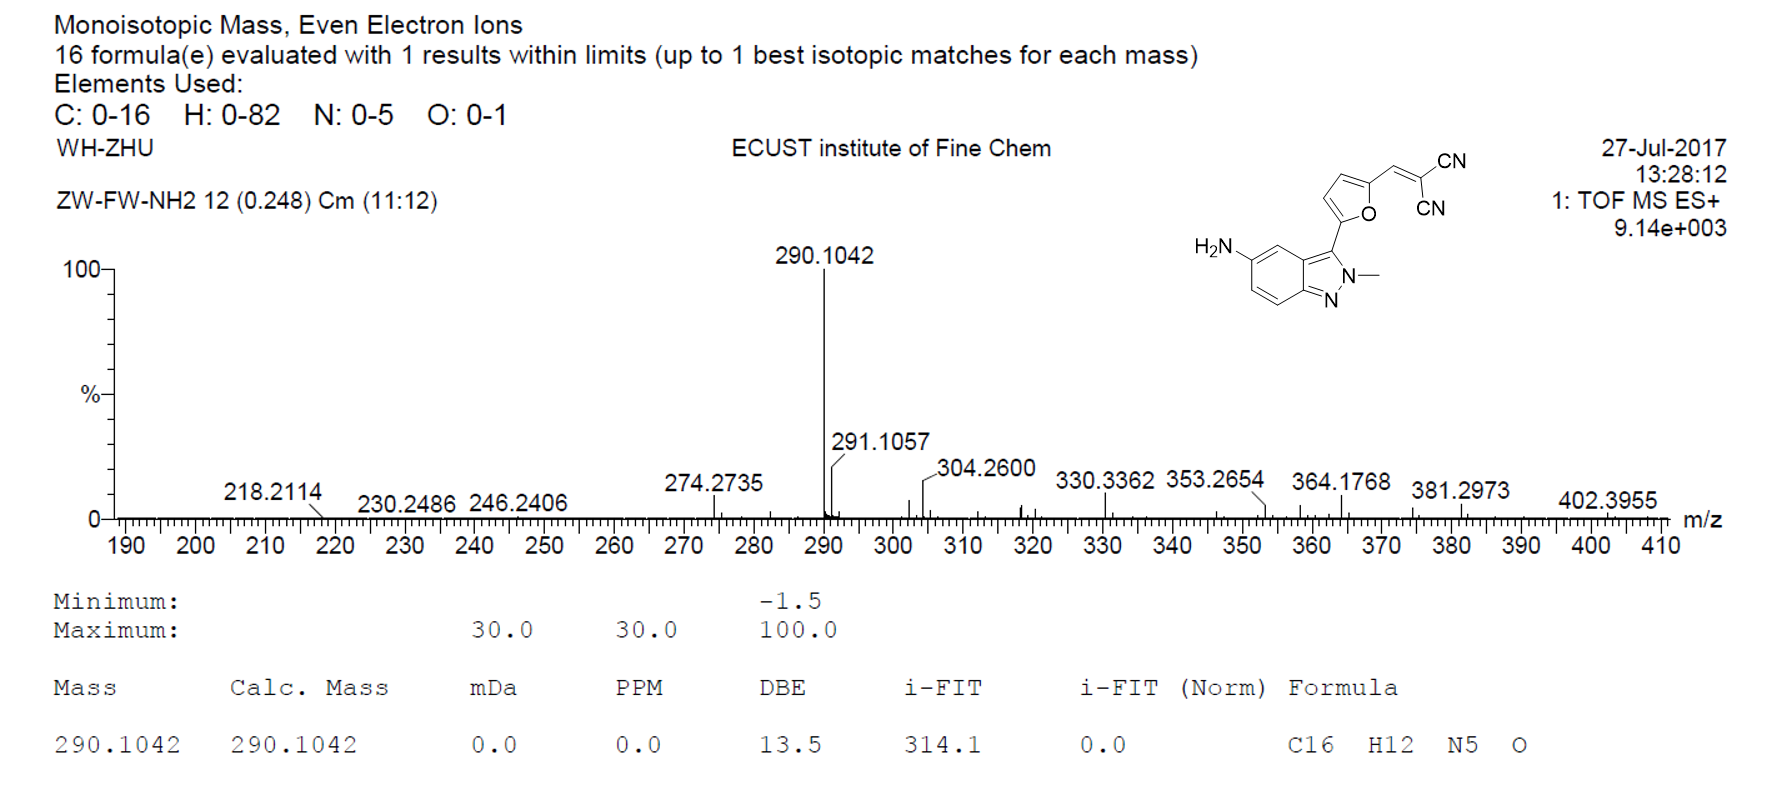


**Supplementary Fig. 37.** HRMS spectrum of **DC-IN-NH2**


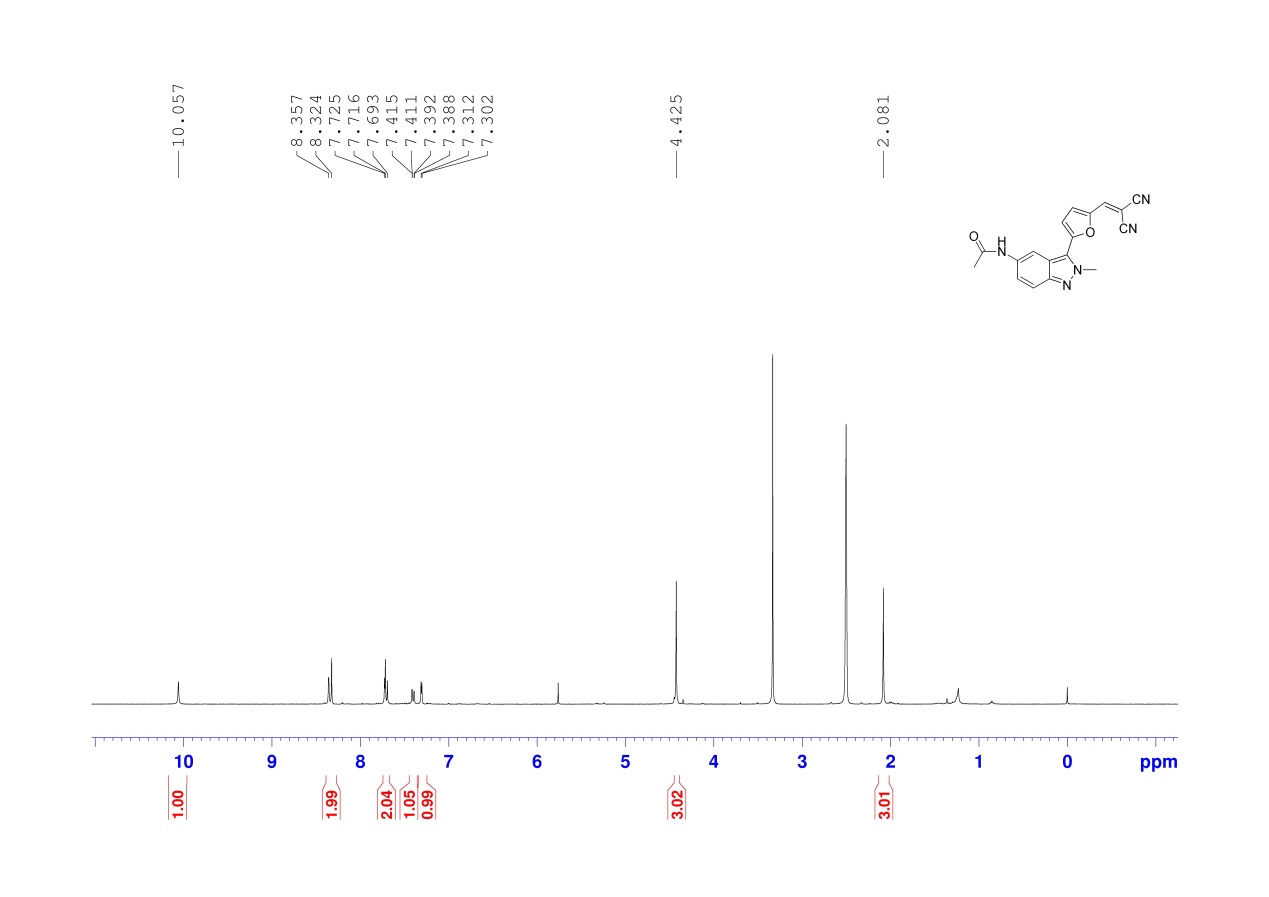


**Supplementary Fig. 38.** 1H NMR spectrum of **DC-IN-Ac** in DMSO-*d*6


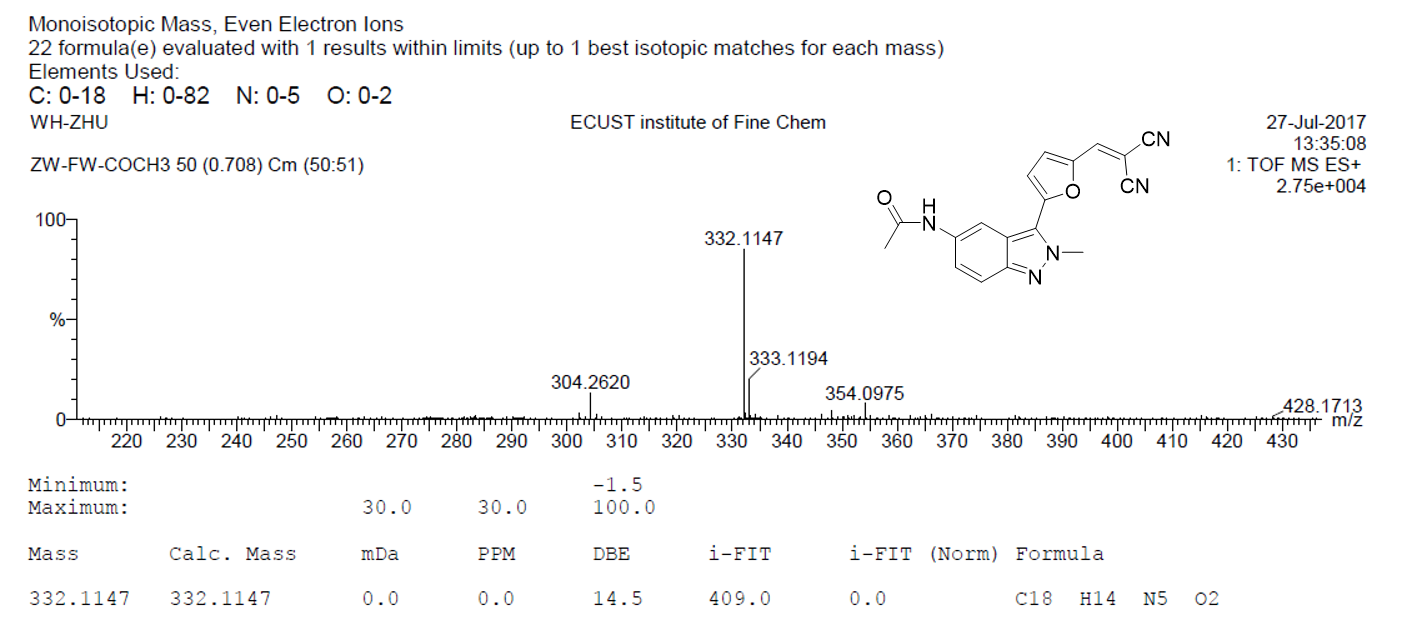


**Supplementary Fig. 39.** HRMS spectrum of **DC-IN-Ac**


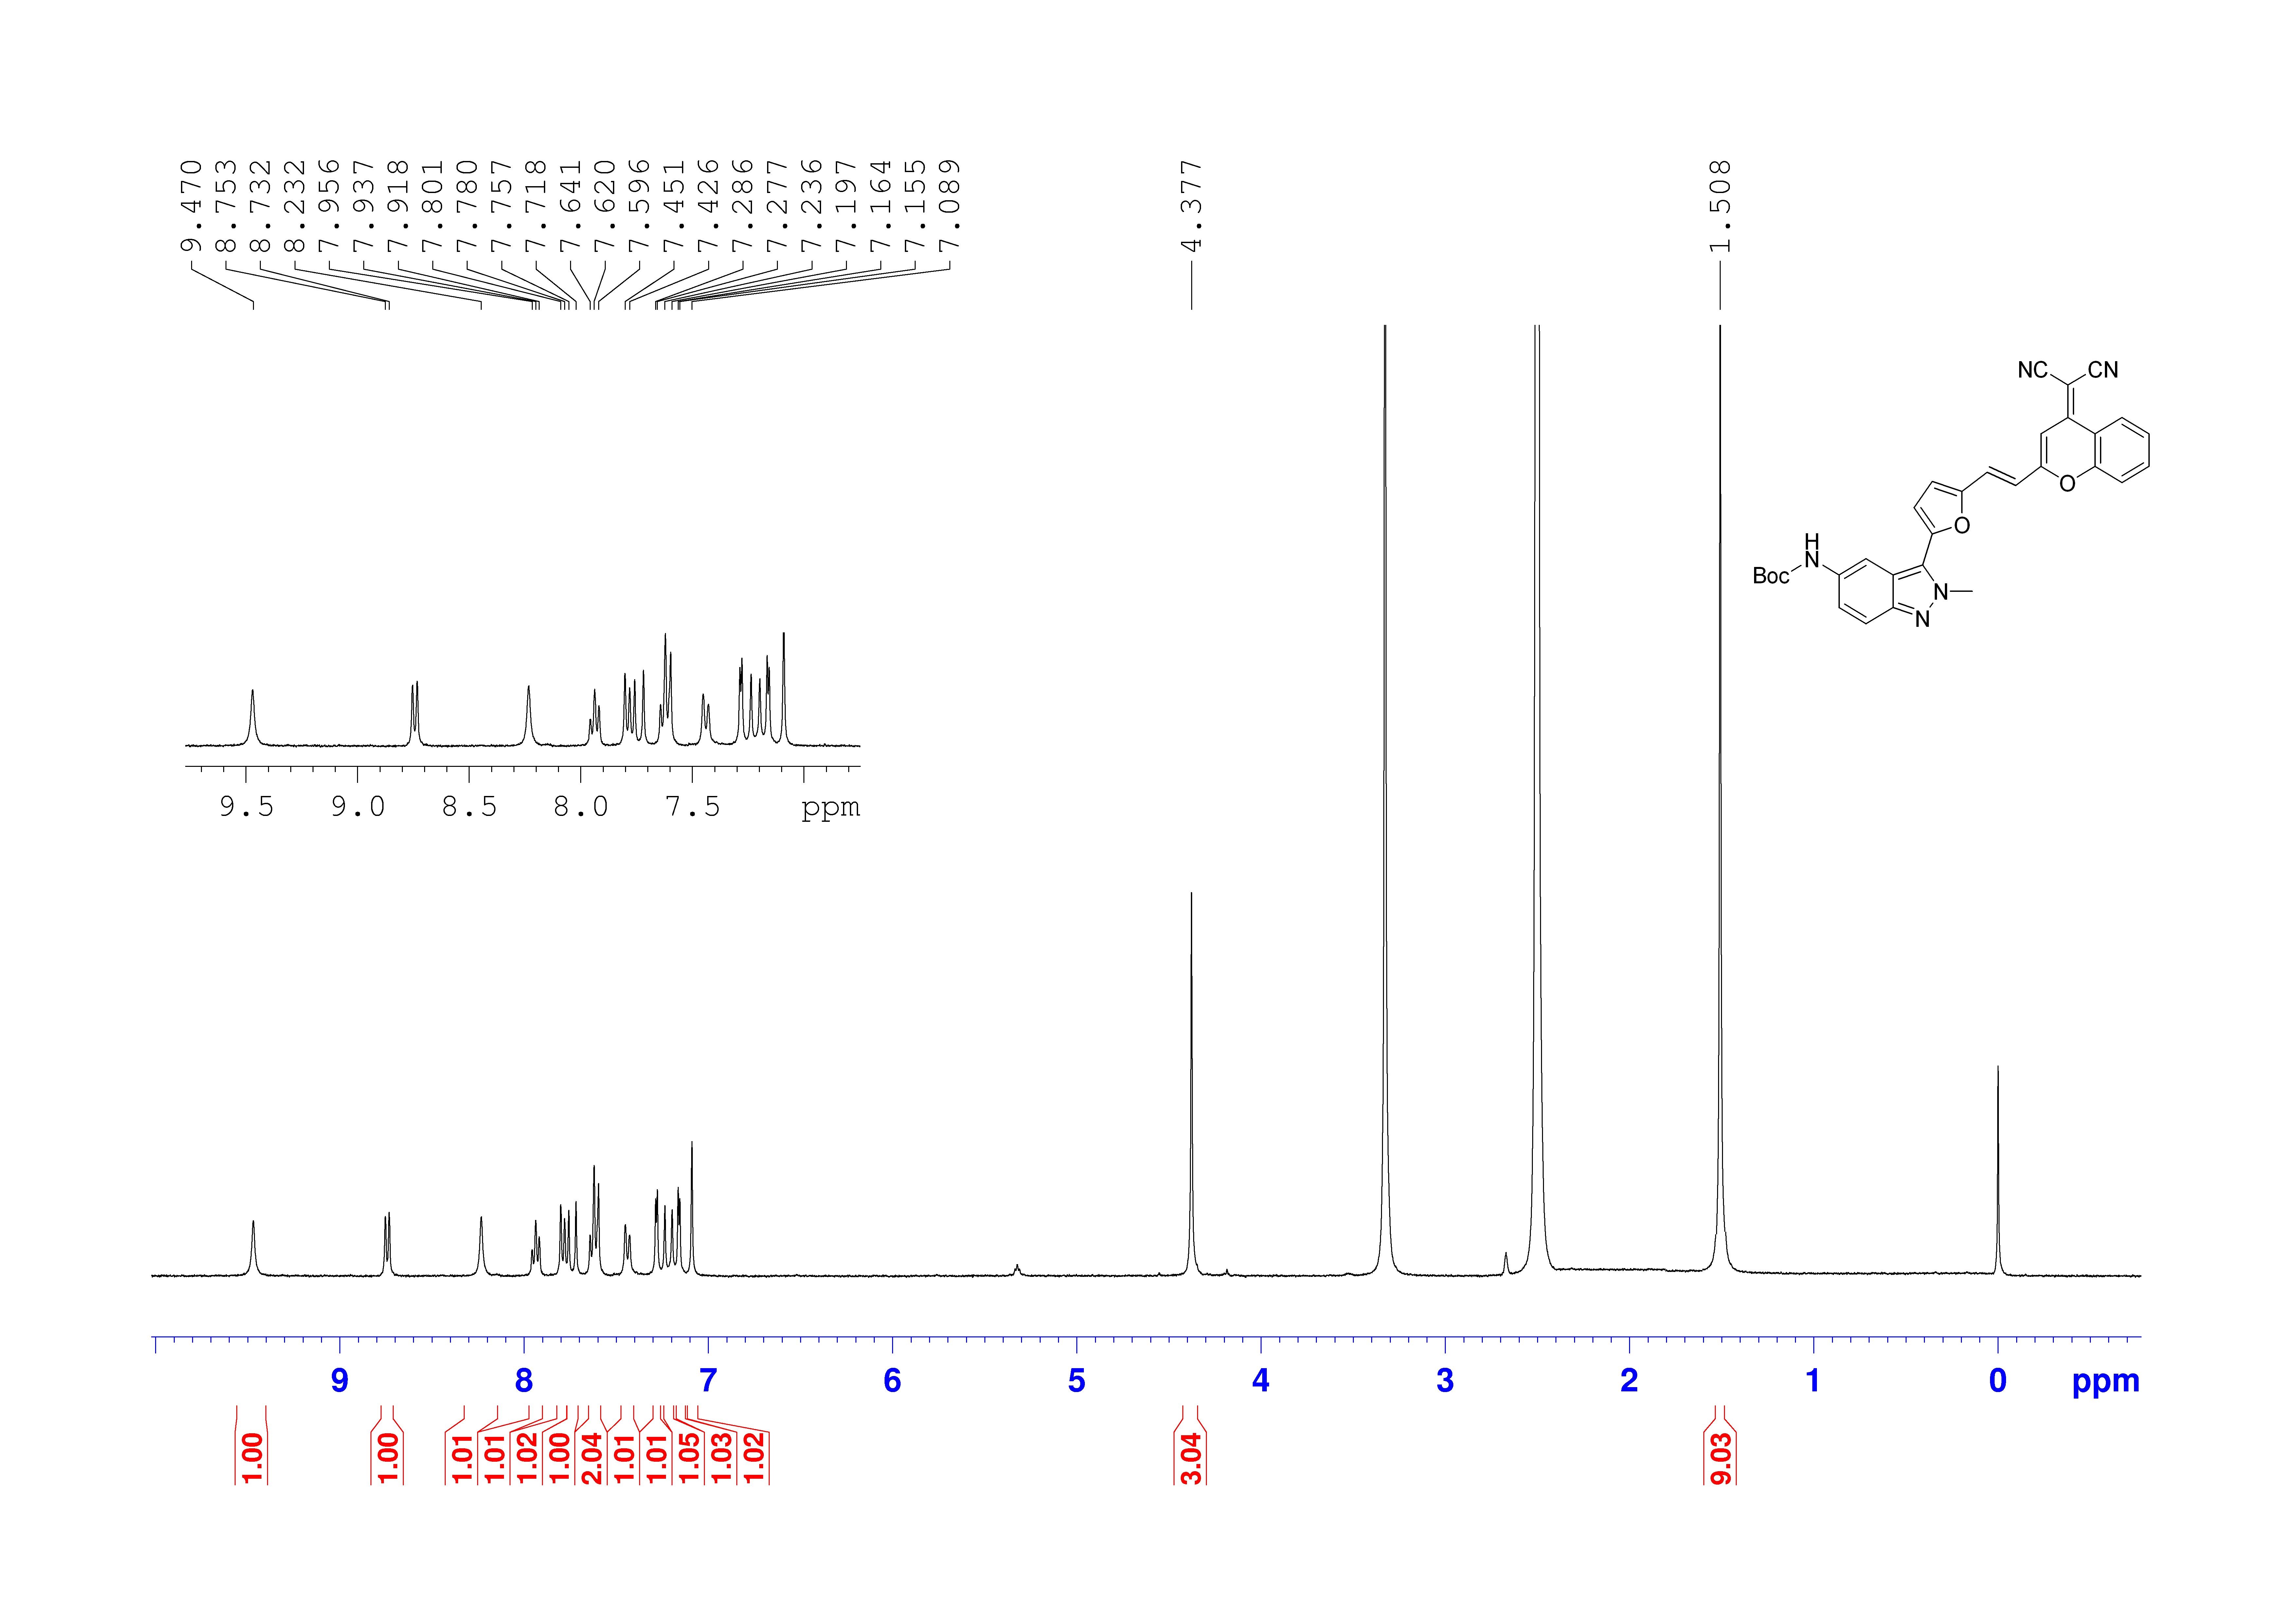


**Supplementary Fig. 40.** 1H NMR spectrum of **DCM-IN-Boc** in DMSO-*d*6


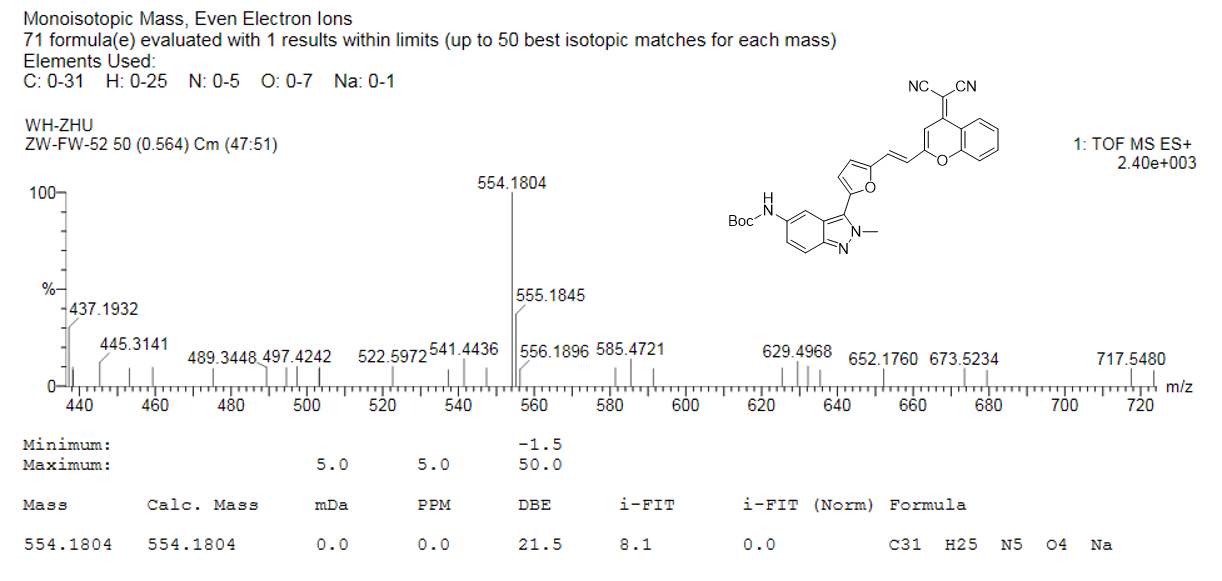


**Supplementary Fig. 41.** HRMS spectrum of **DCM-IN-Boc**


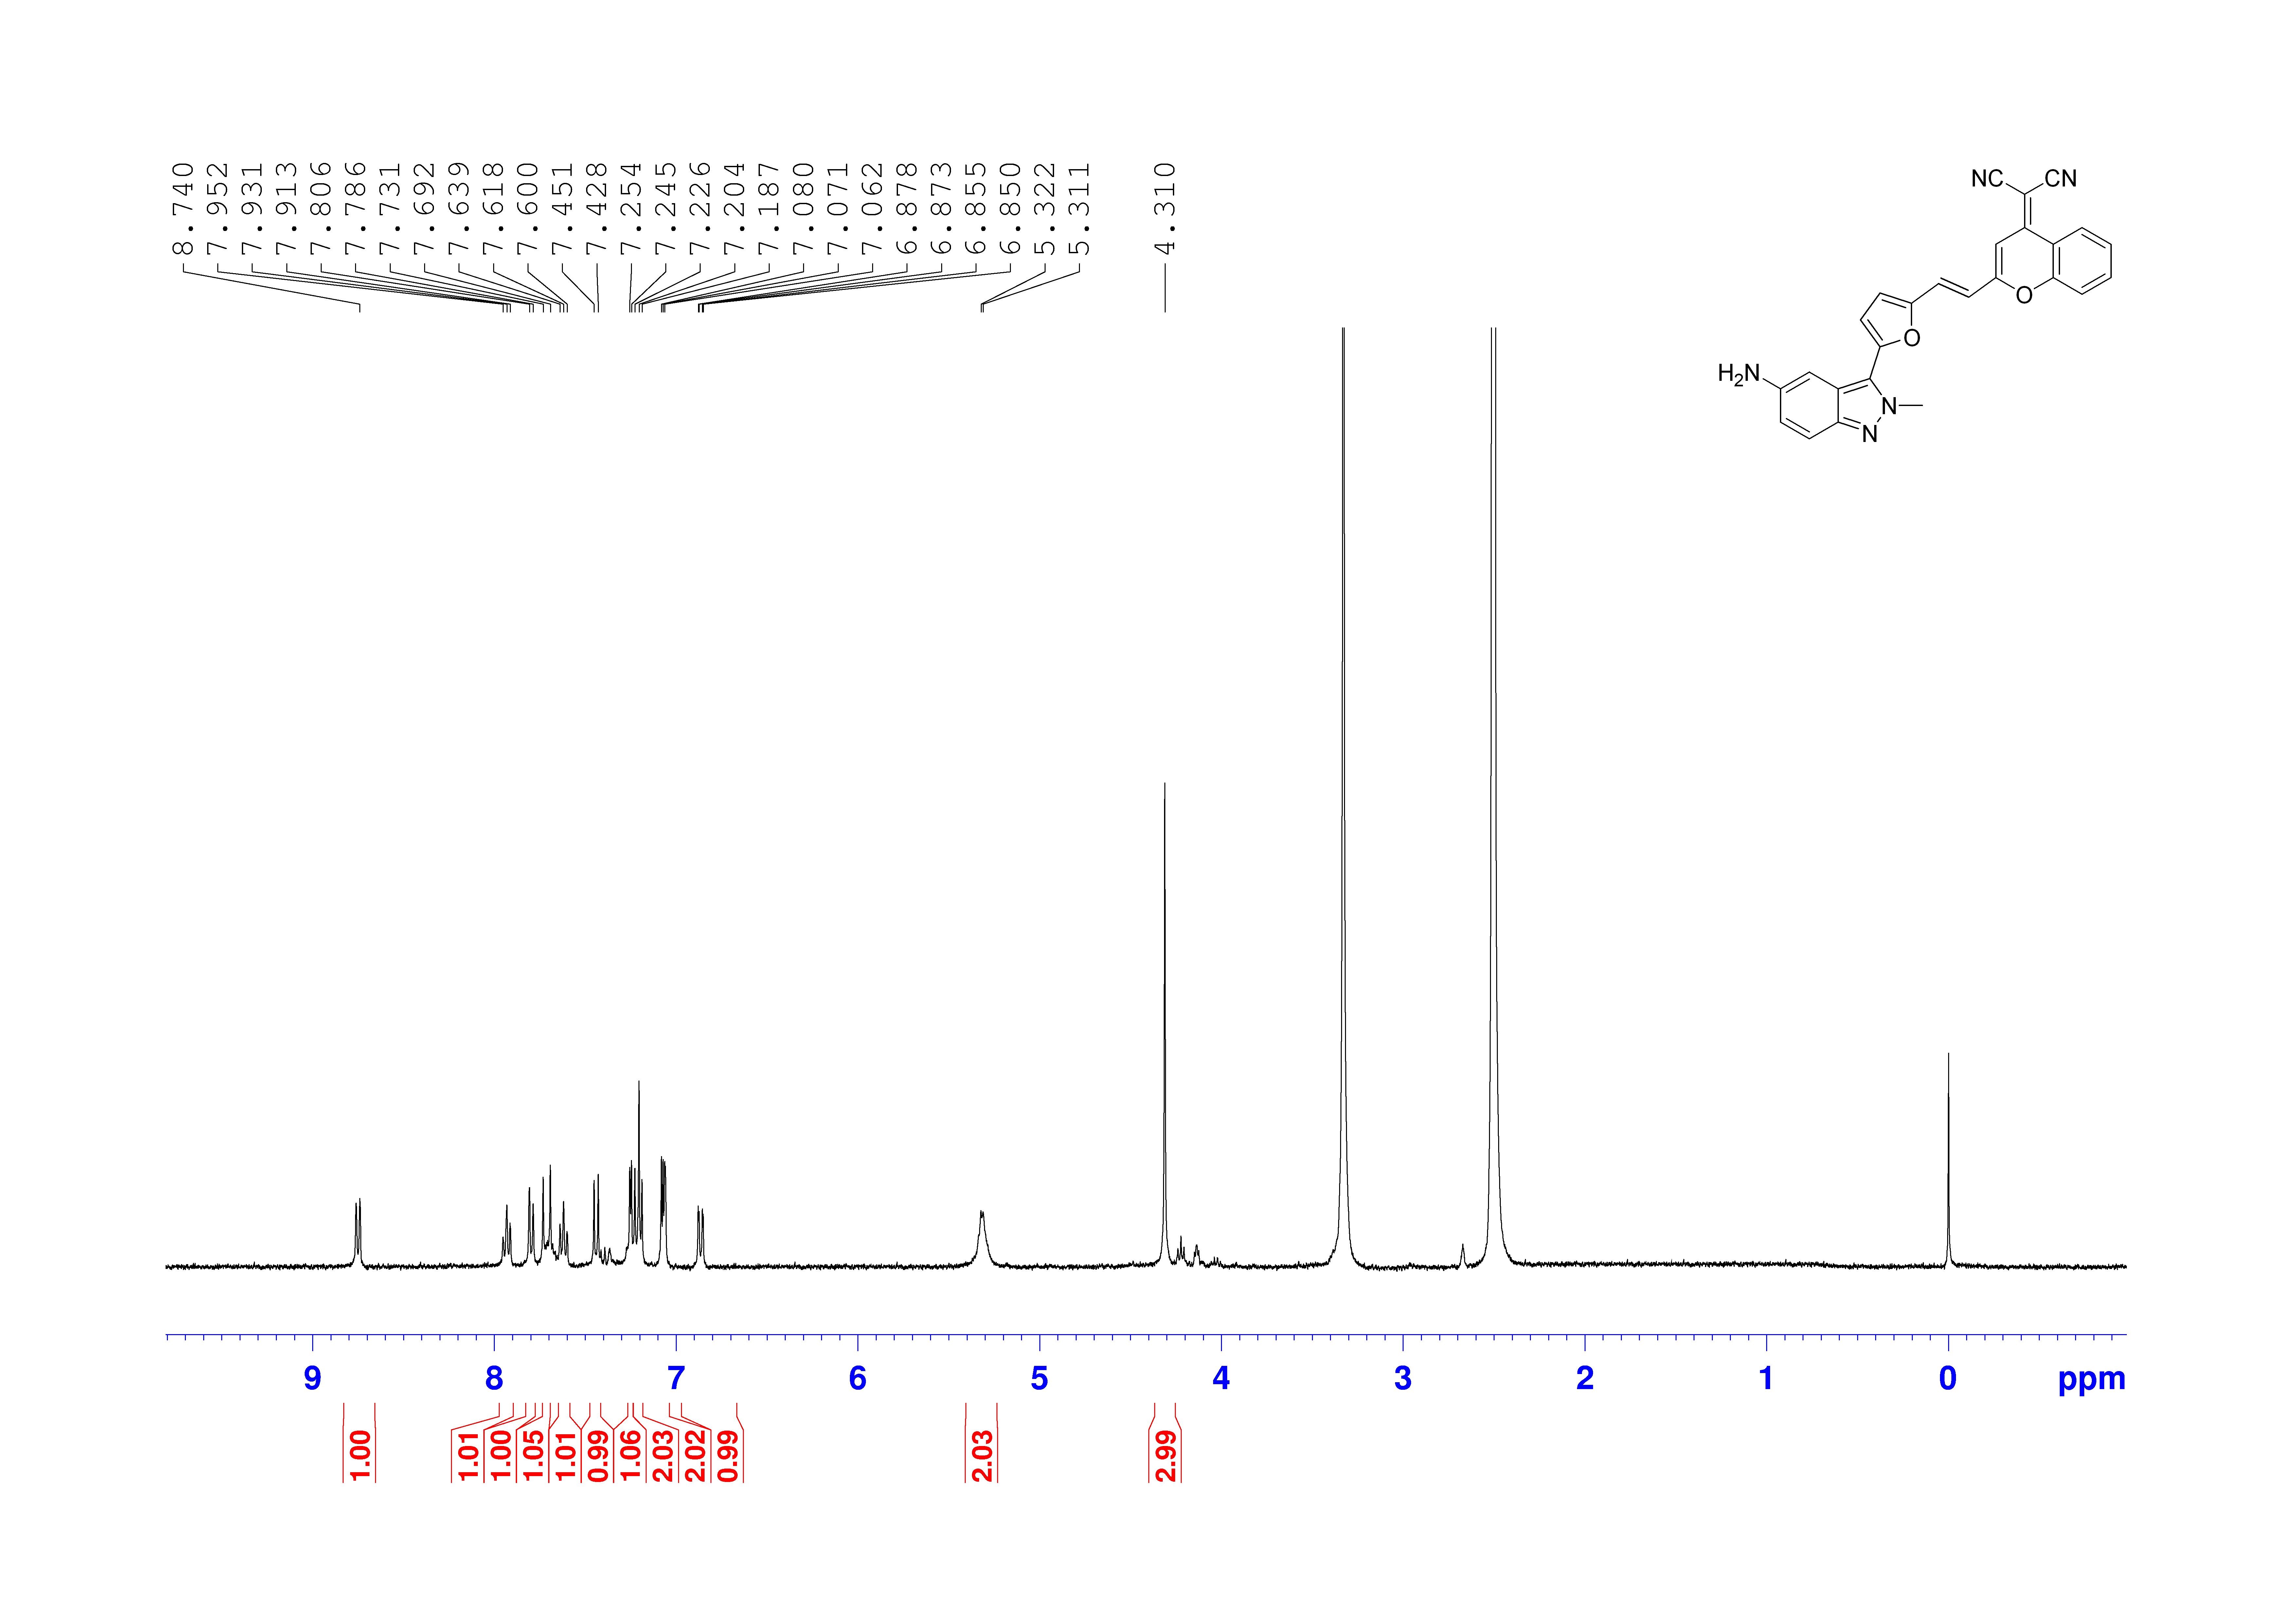


**Supplementary Fig. 42.** 1H NMR spectrum of **DCM-IN-NH2** in DMSO-*d*6


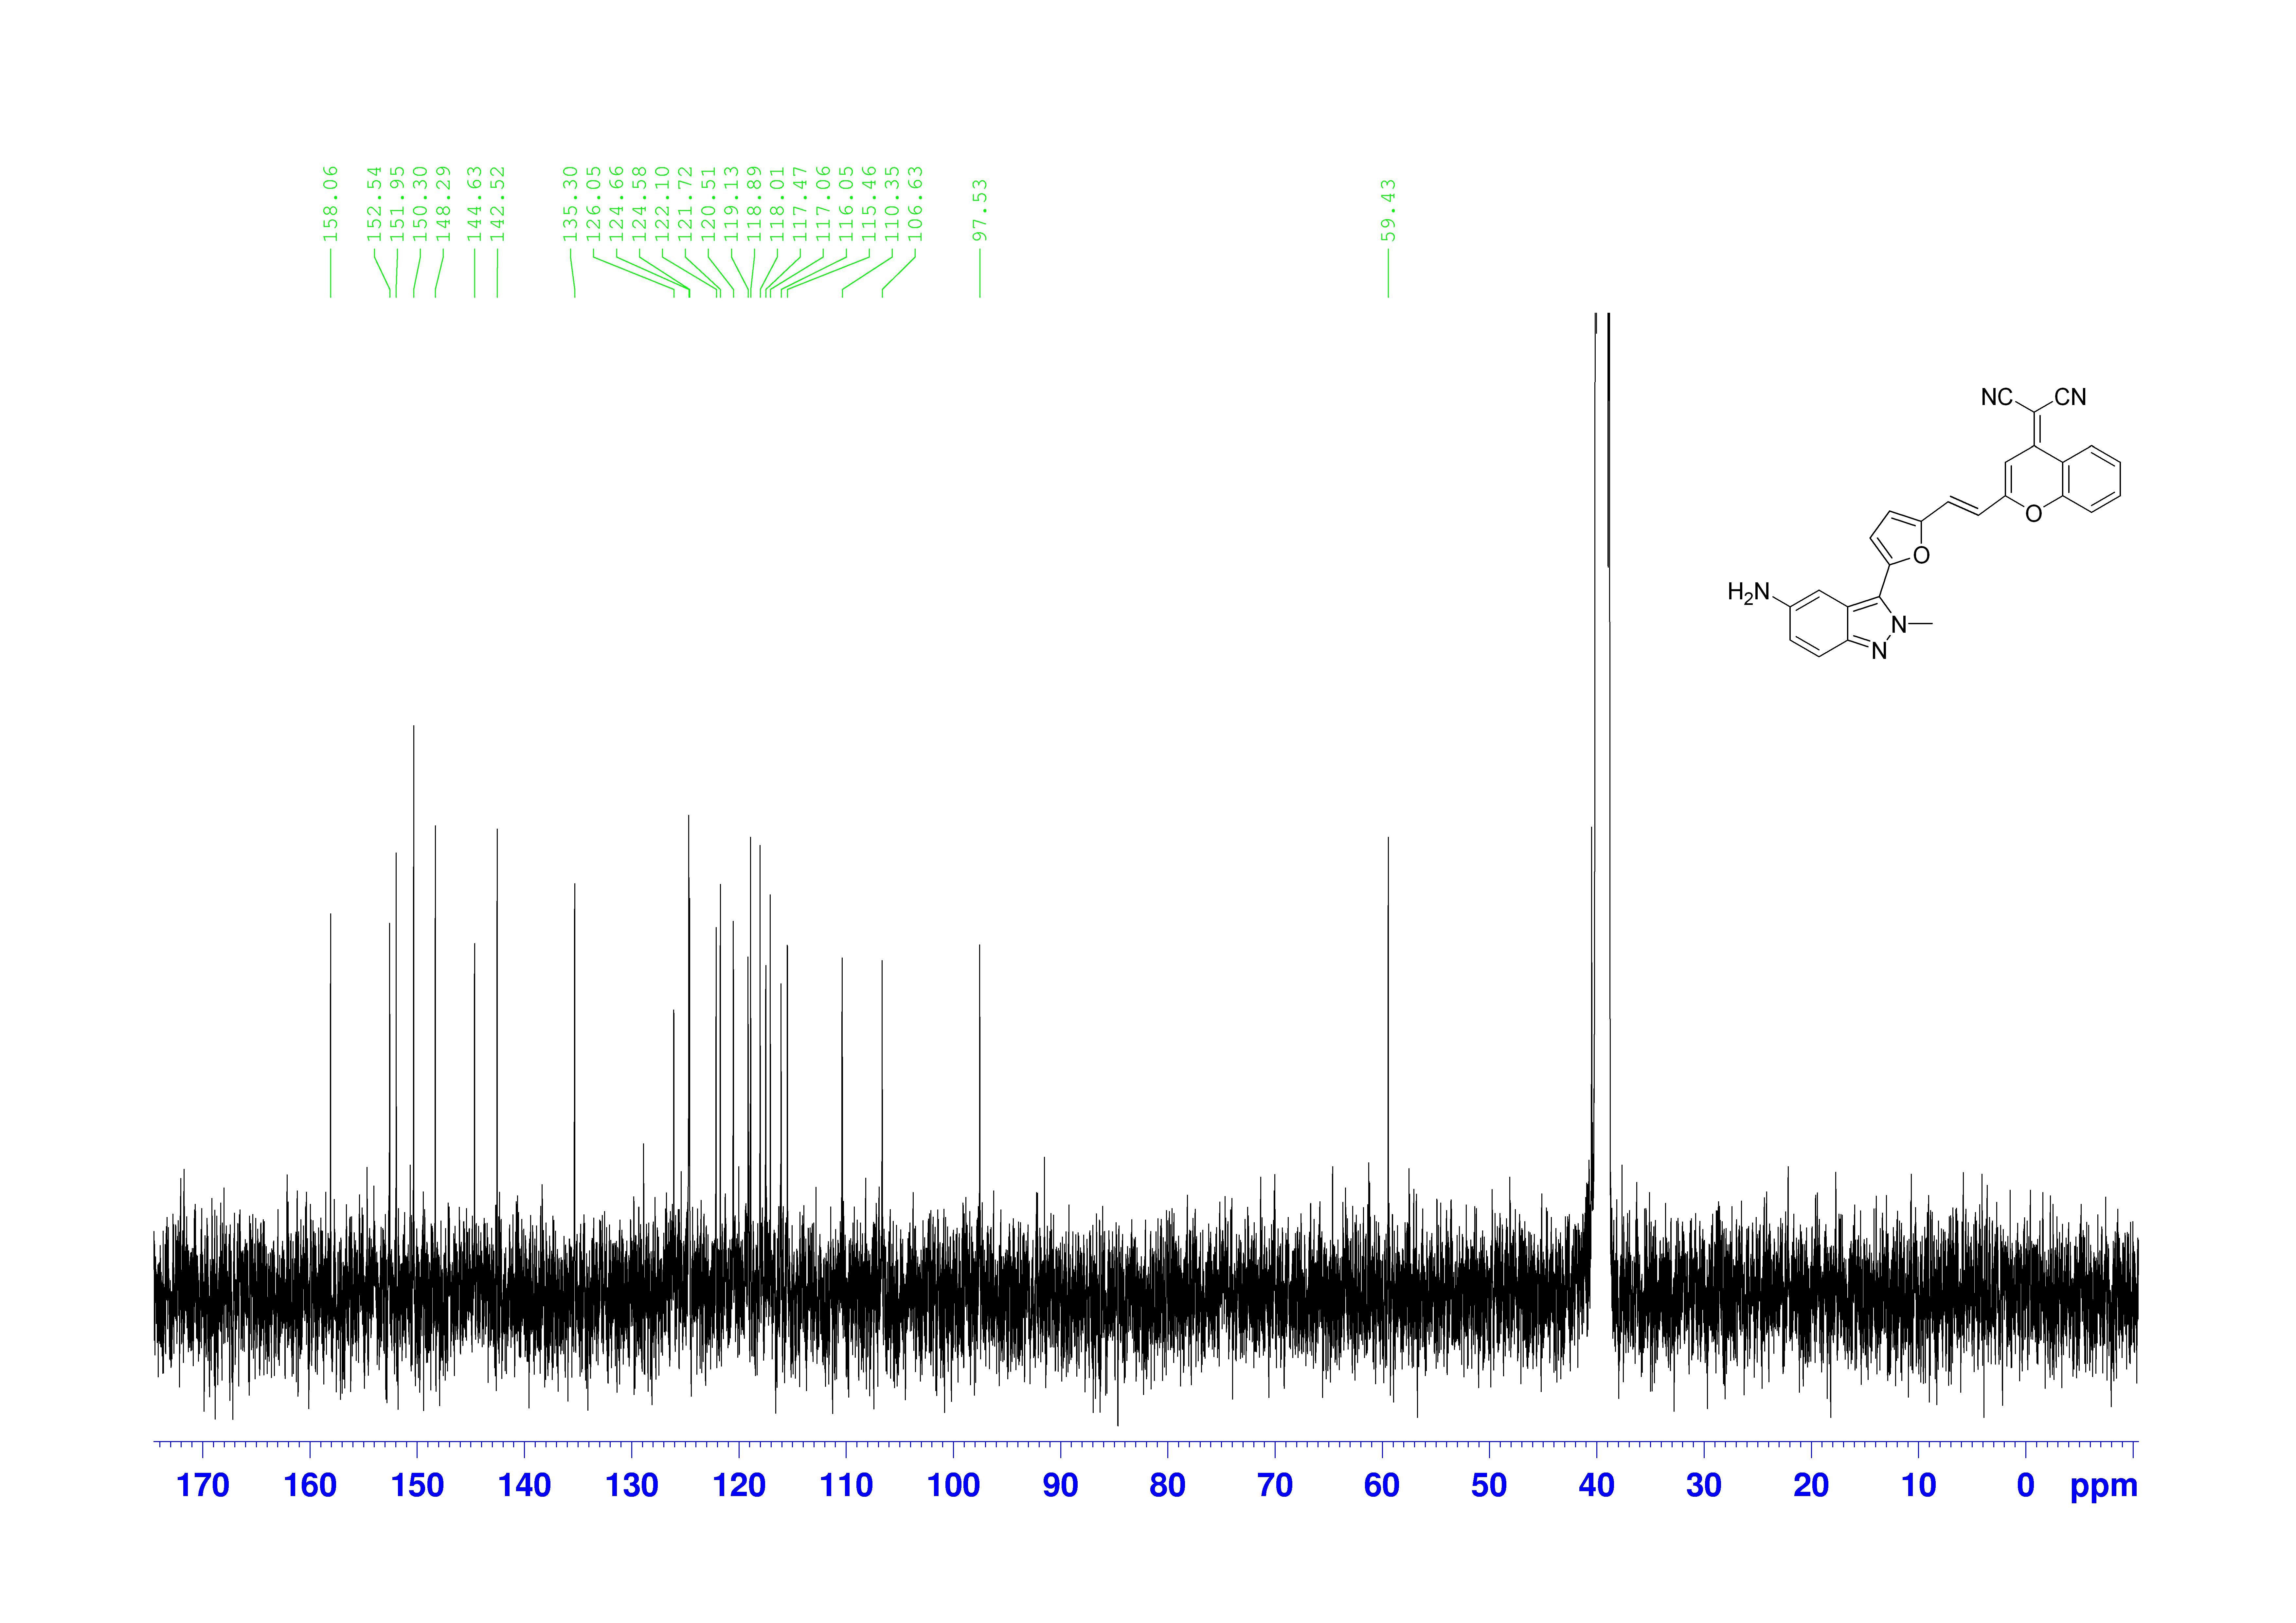


**Supplementary Fig. 43.** 13C NMR spectrum of **DCM-IN-NH2** in DMSO-*d*6


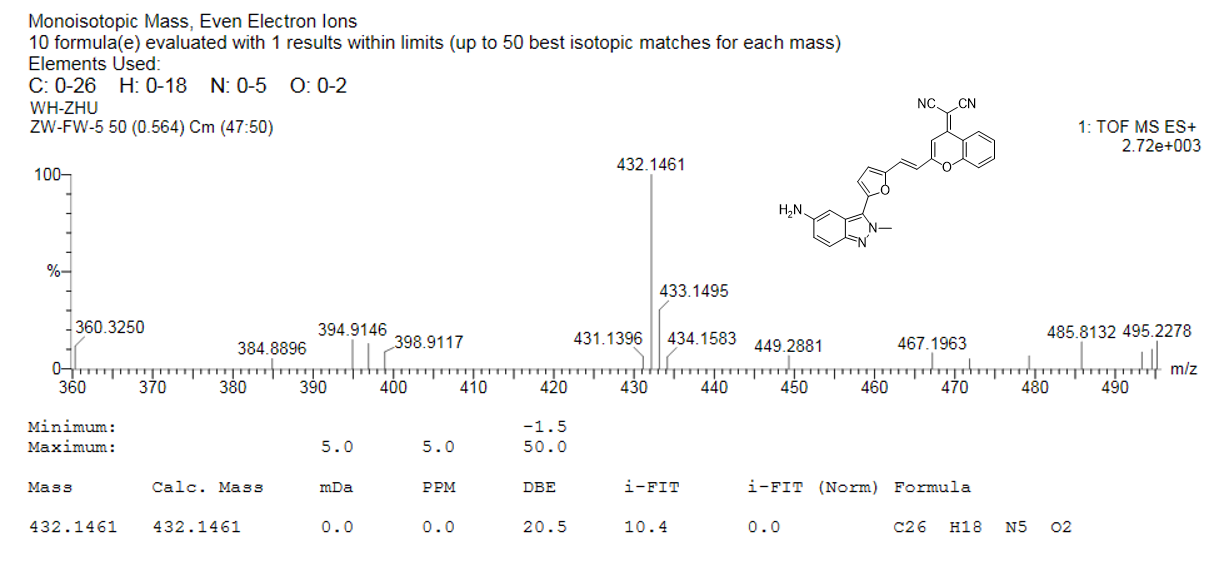


**Supplementary Fig. 44.** HRMS spectrum of **DCM-IN-NH2**


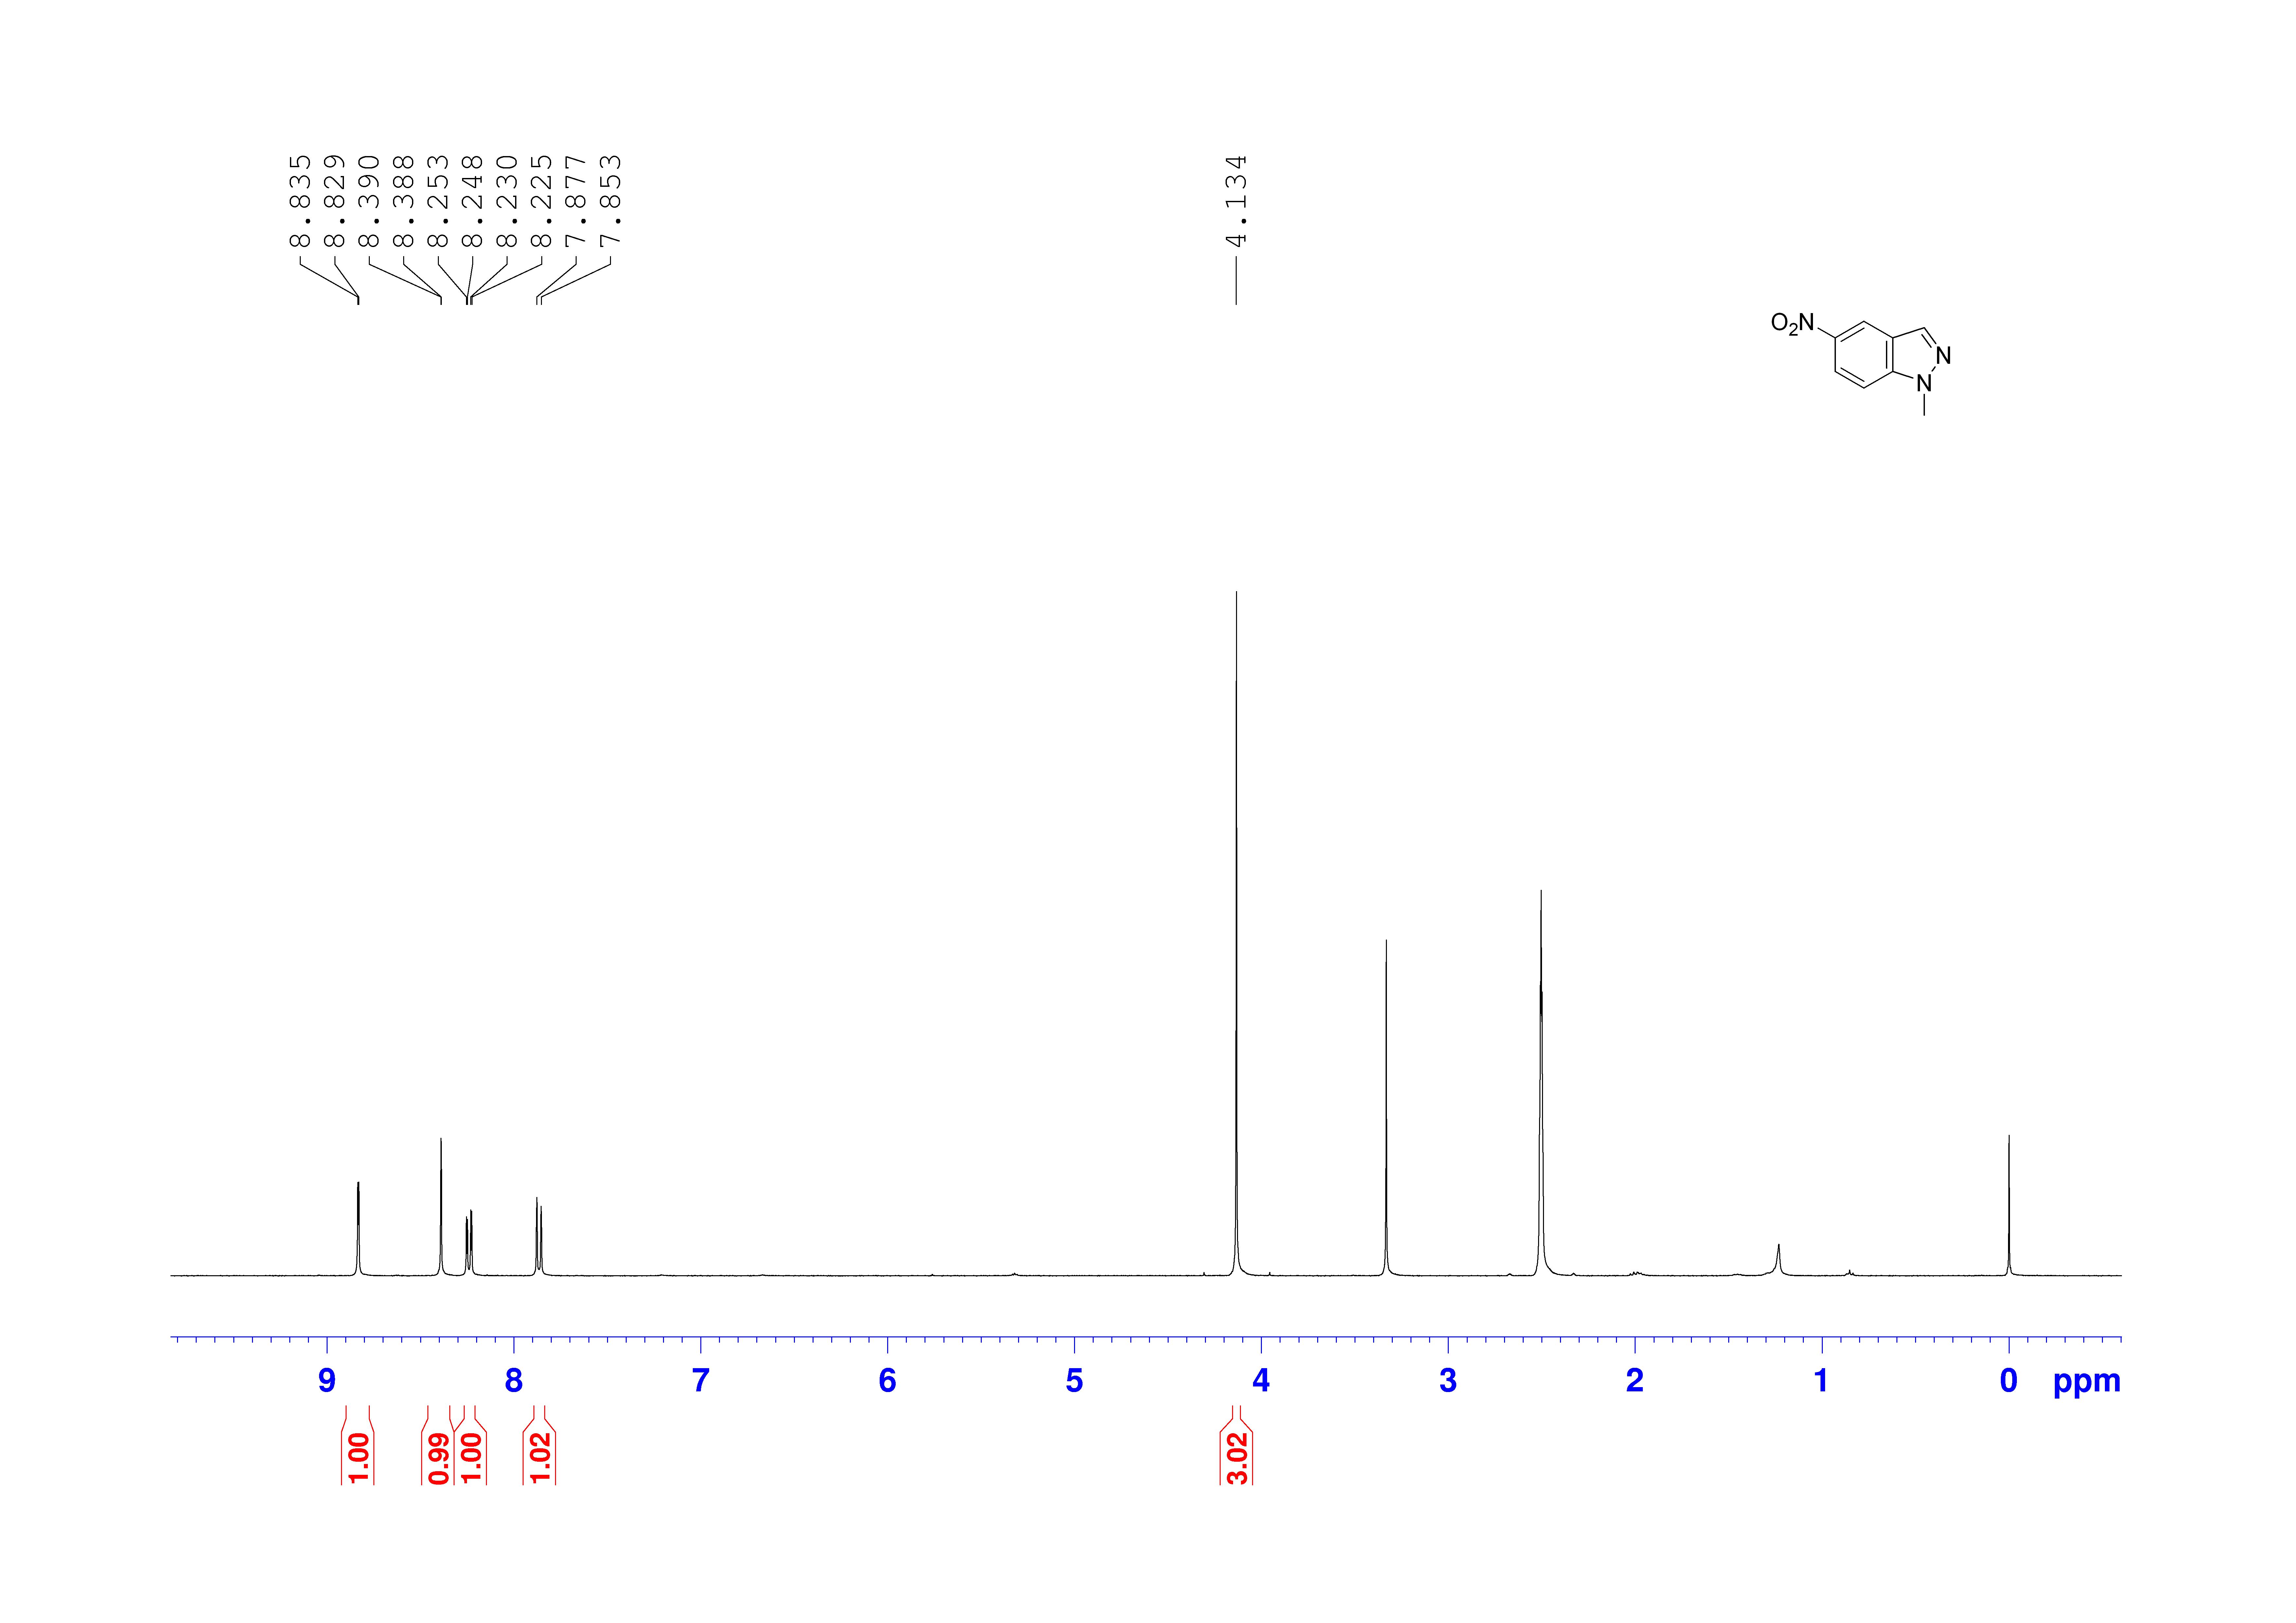


**Supplementary Fig. 45.** 1H NMR spectrum of **IN1-NO2** in DMSO-*d*6


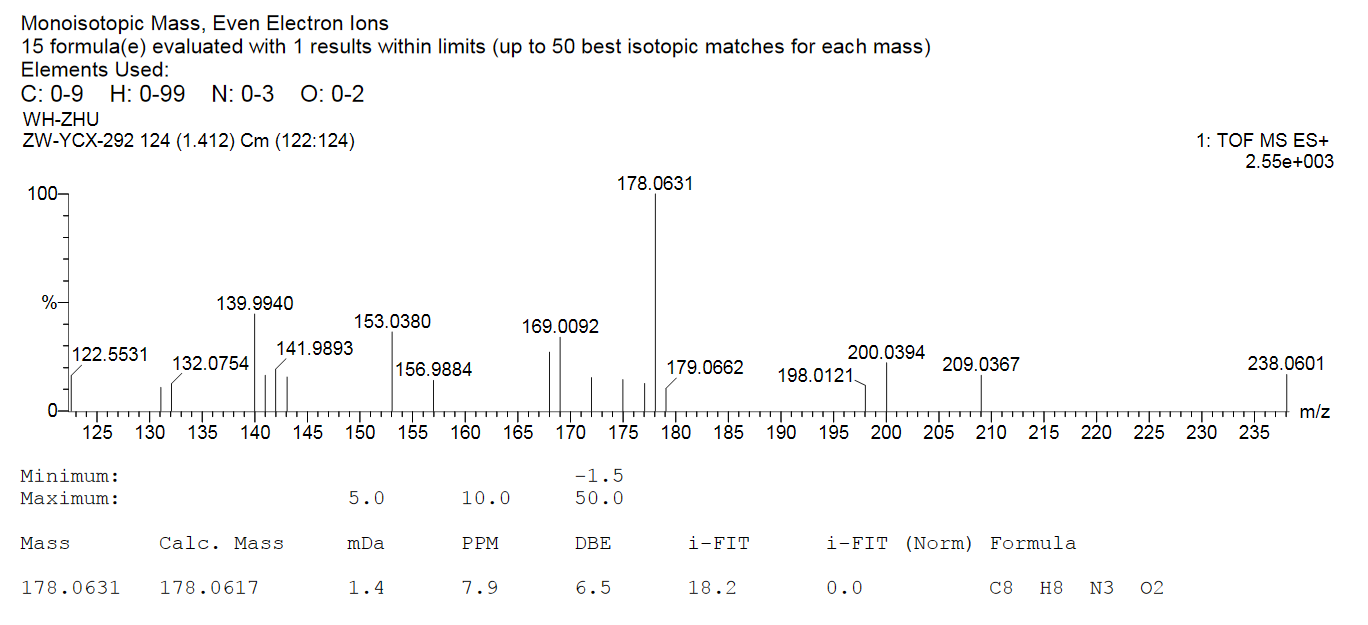


**Supplementary Fig. 46.** HRMS spectrum of **IN1-NO2**


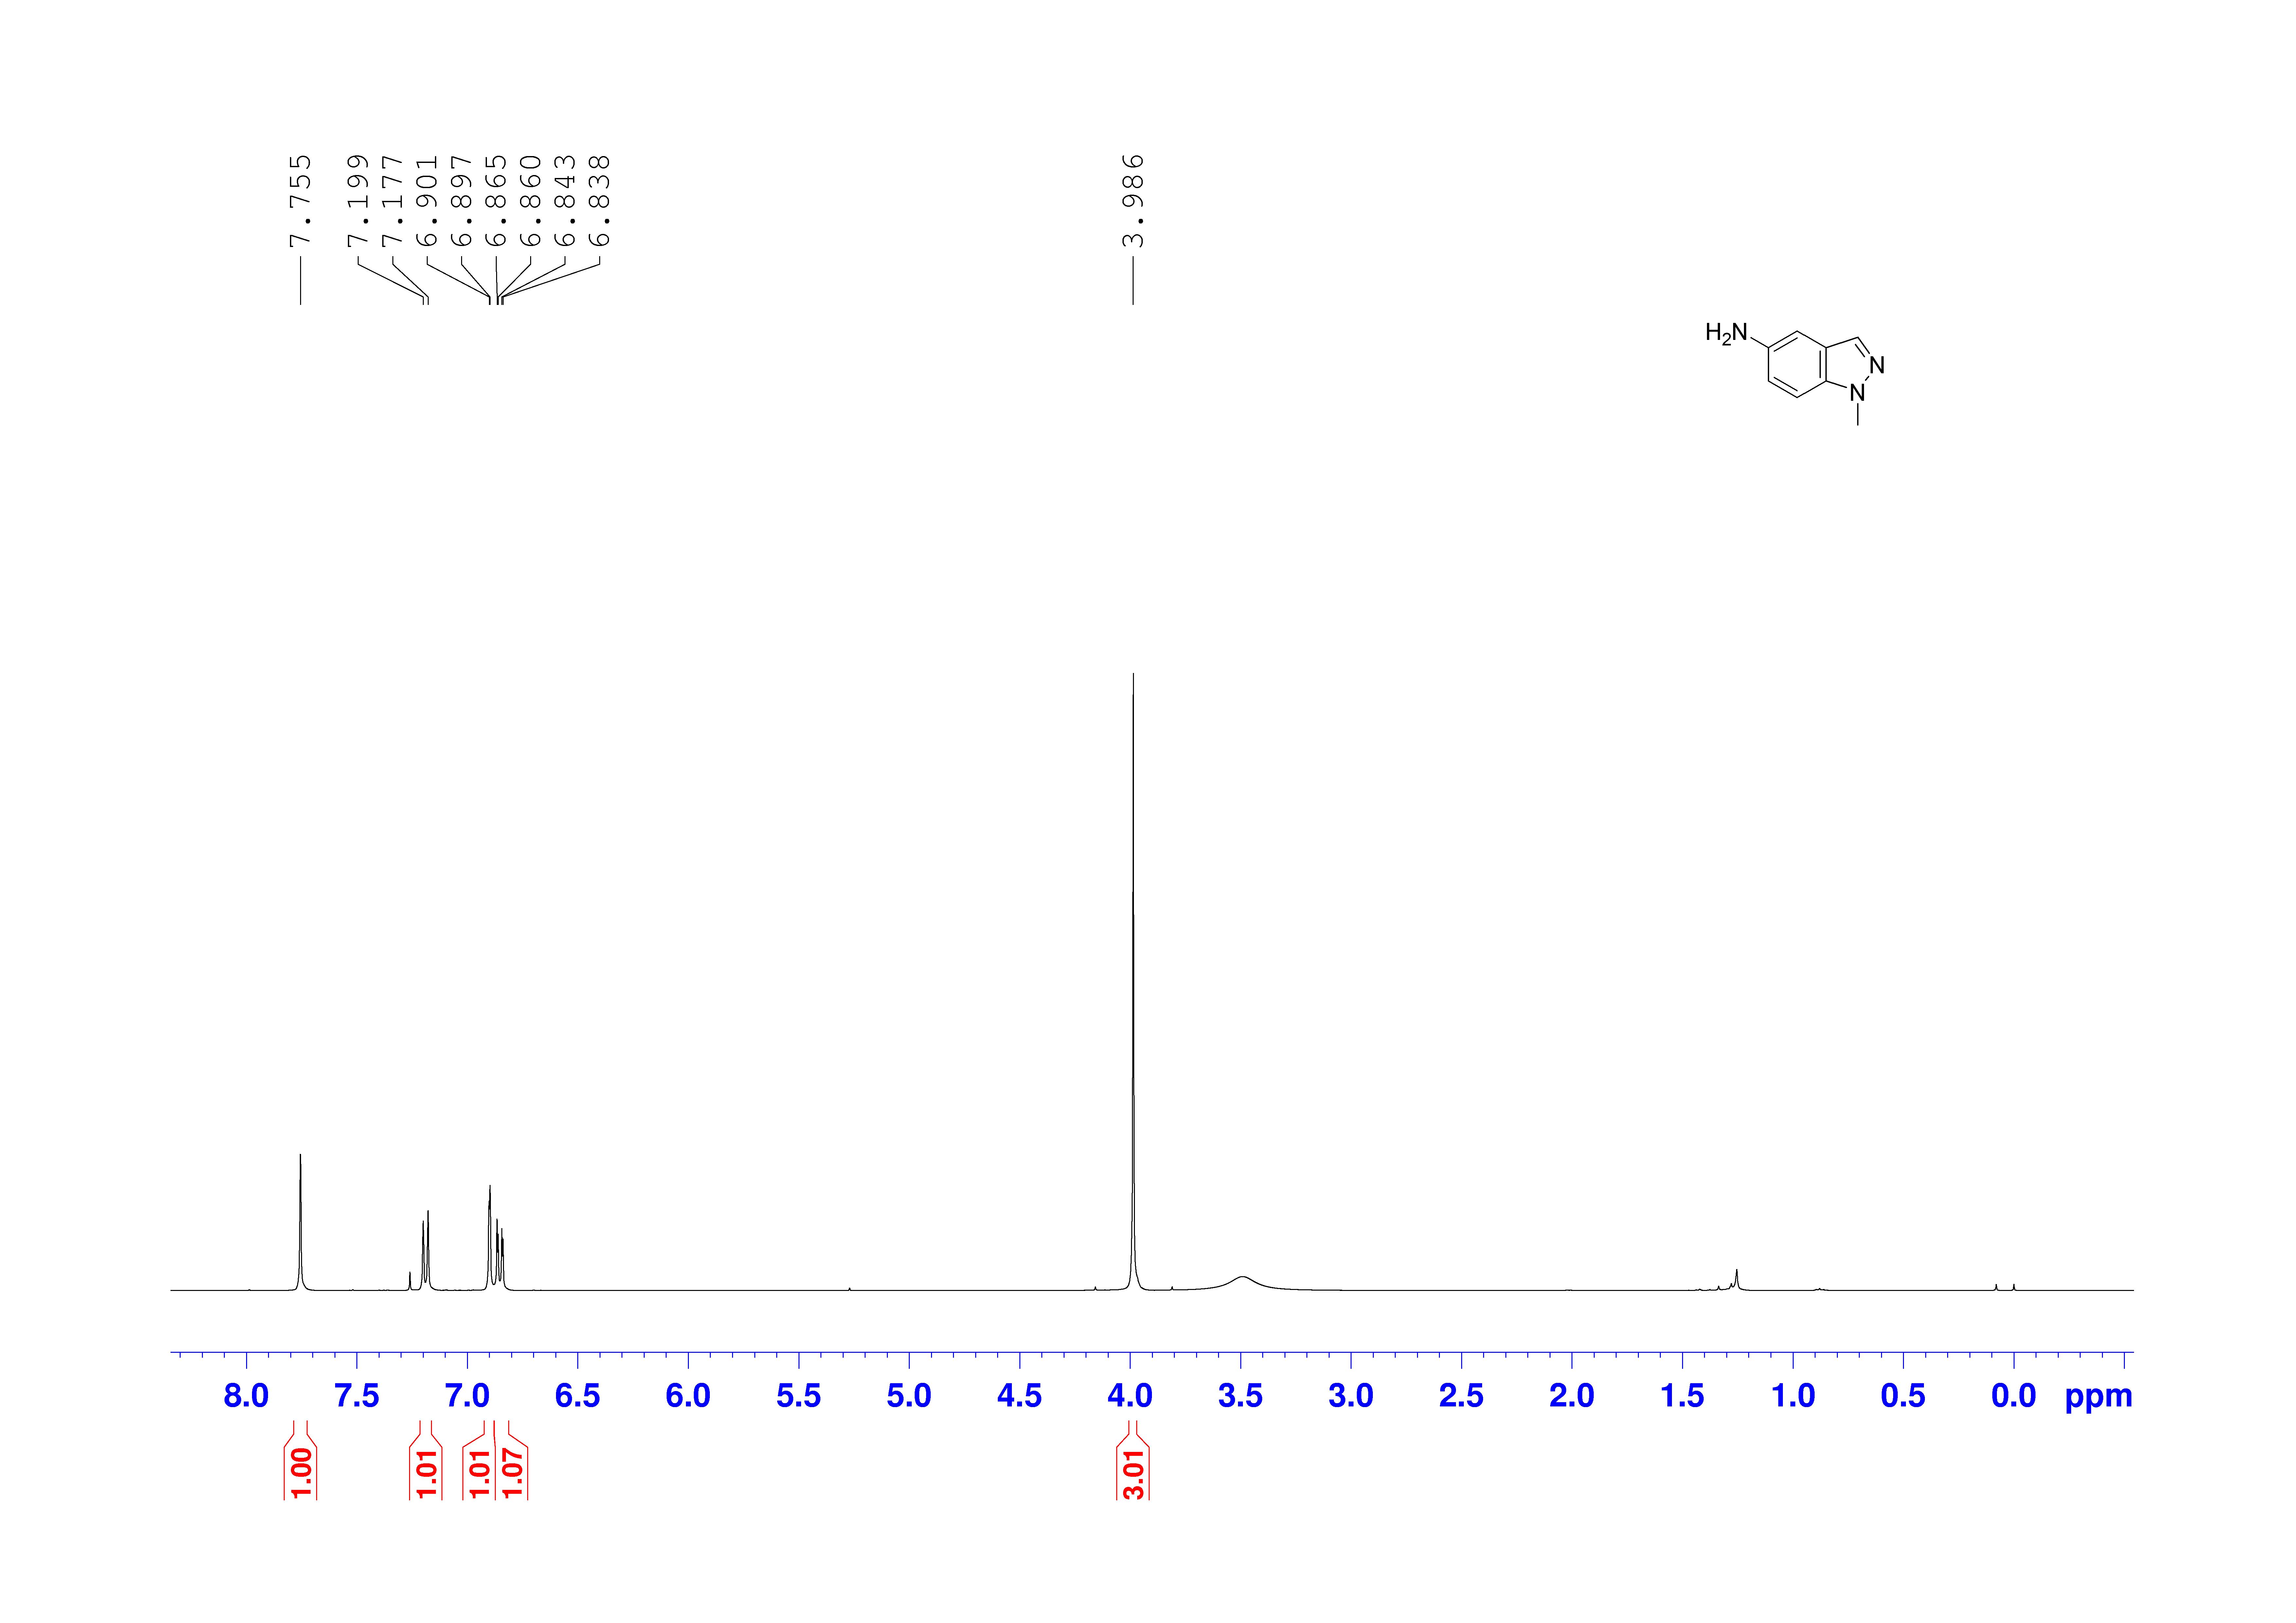


**Supplementary Fig. 47.** 1H NMR spectrum of **IN1-NH2** in CDCl3


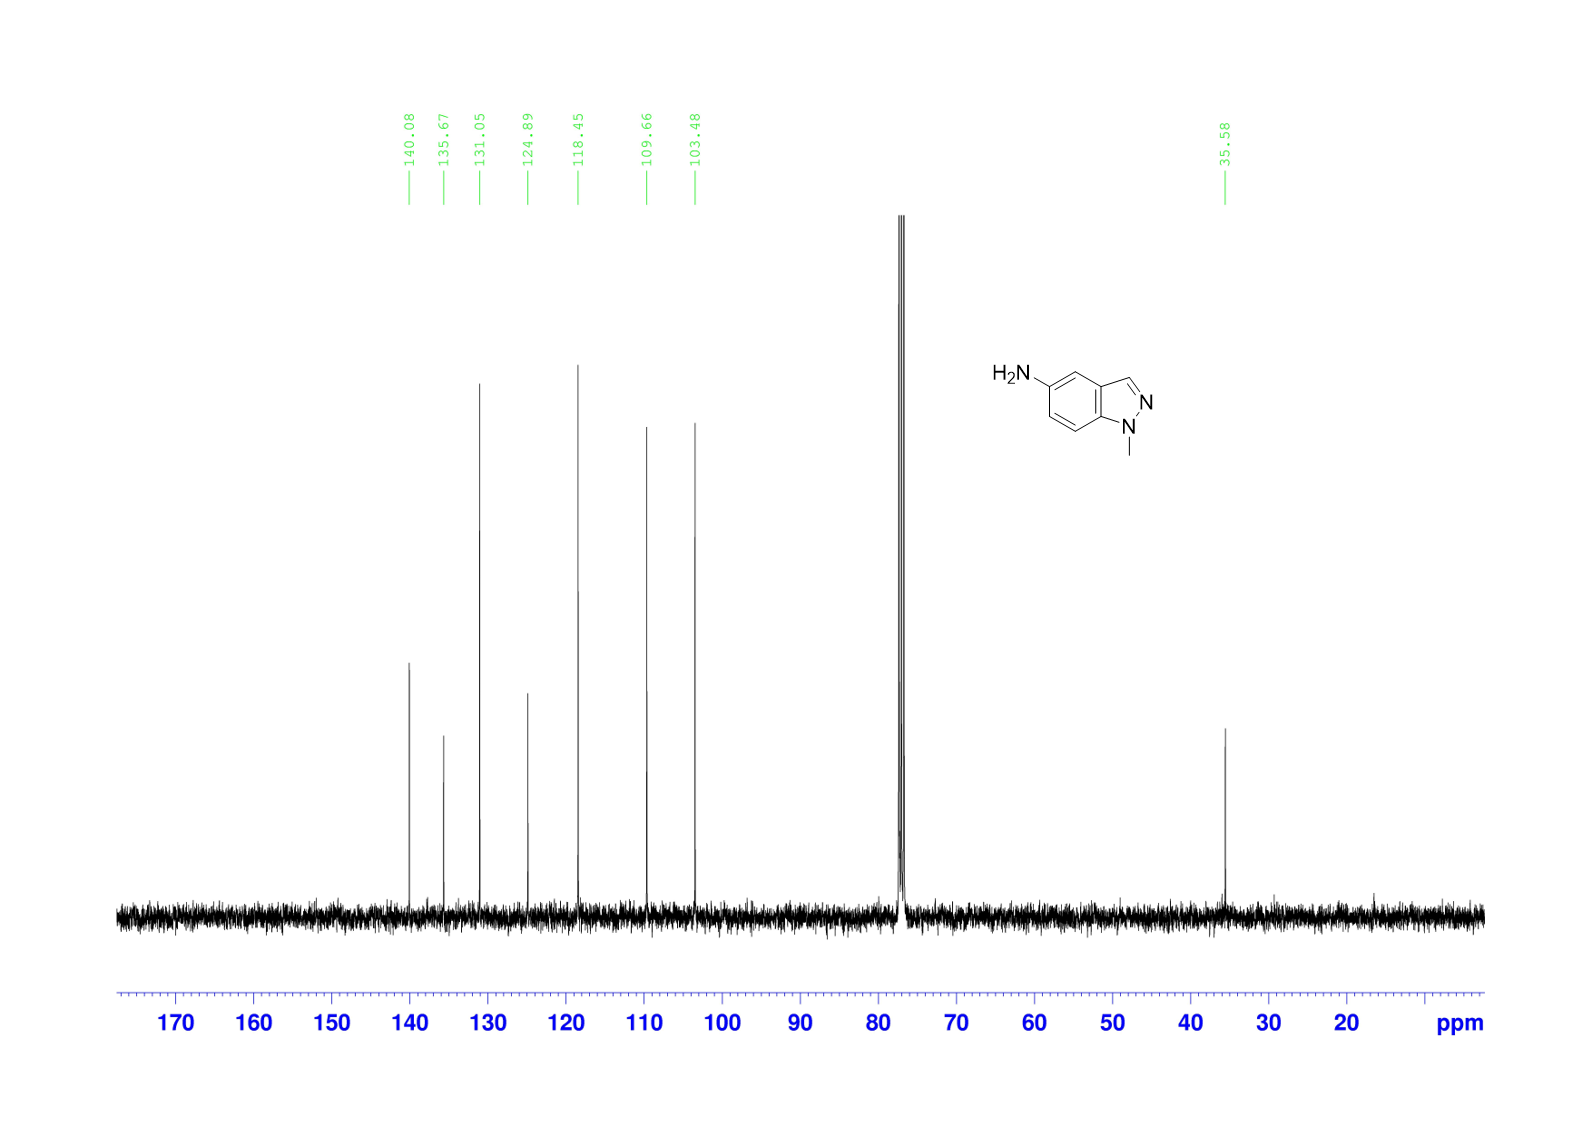


**Supplementary Fig. 48.** 13C NMR spectrum of **IN1-NH2** in CDCl3


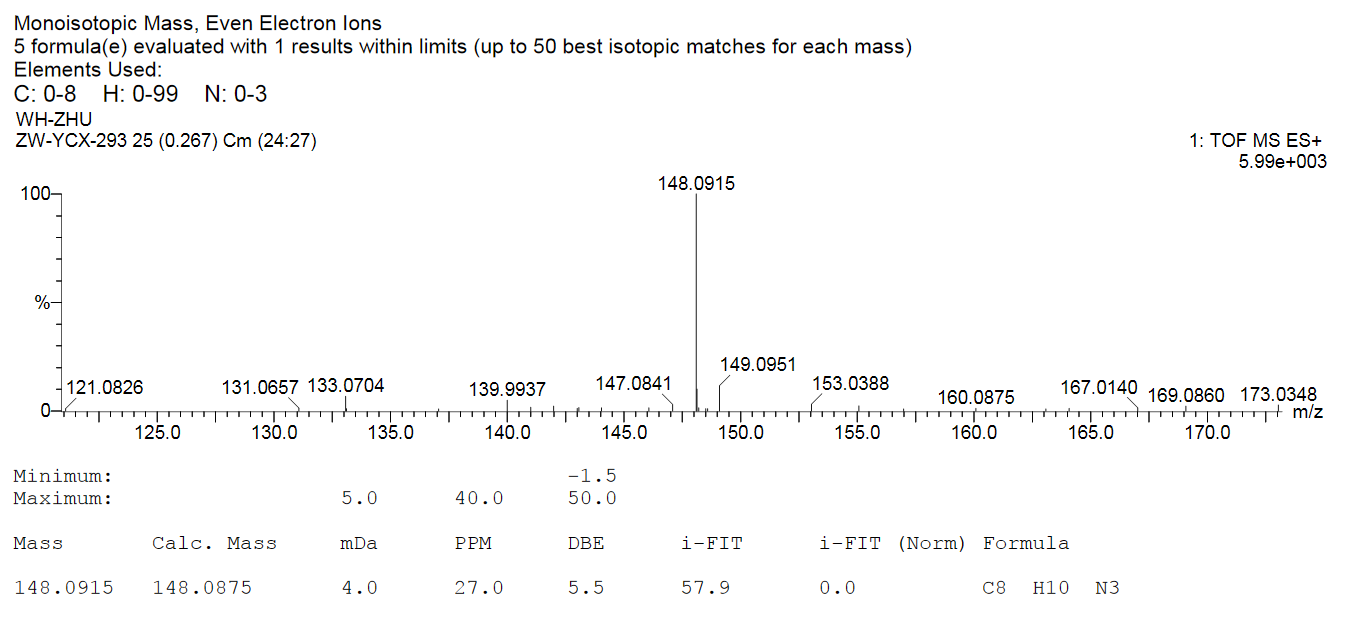


**Supplementary Fig. 49.** HRMS spectrum of **IN1-NH2**


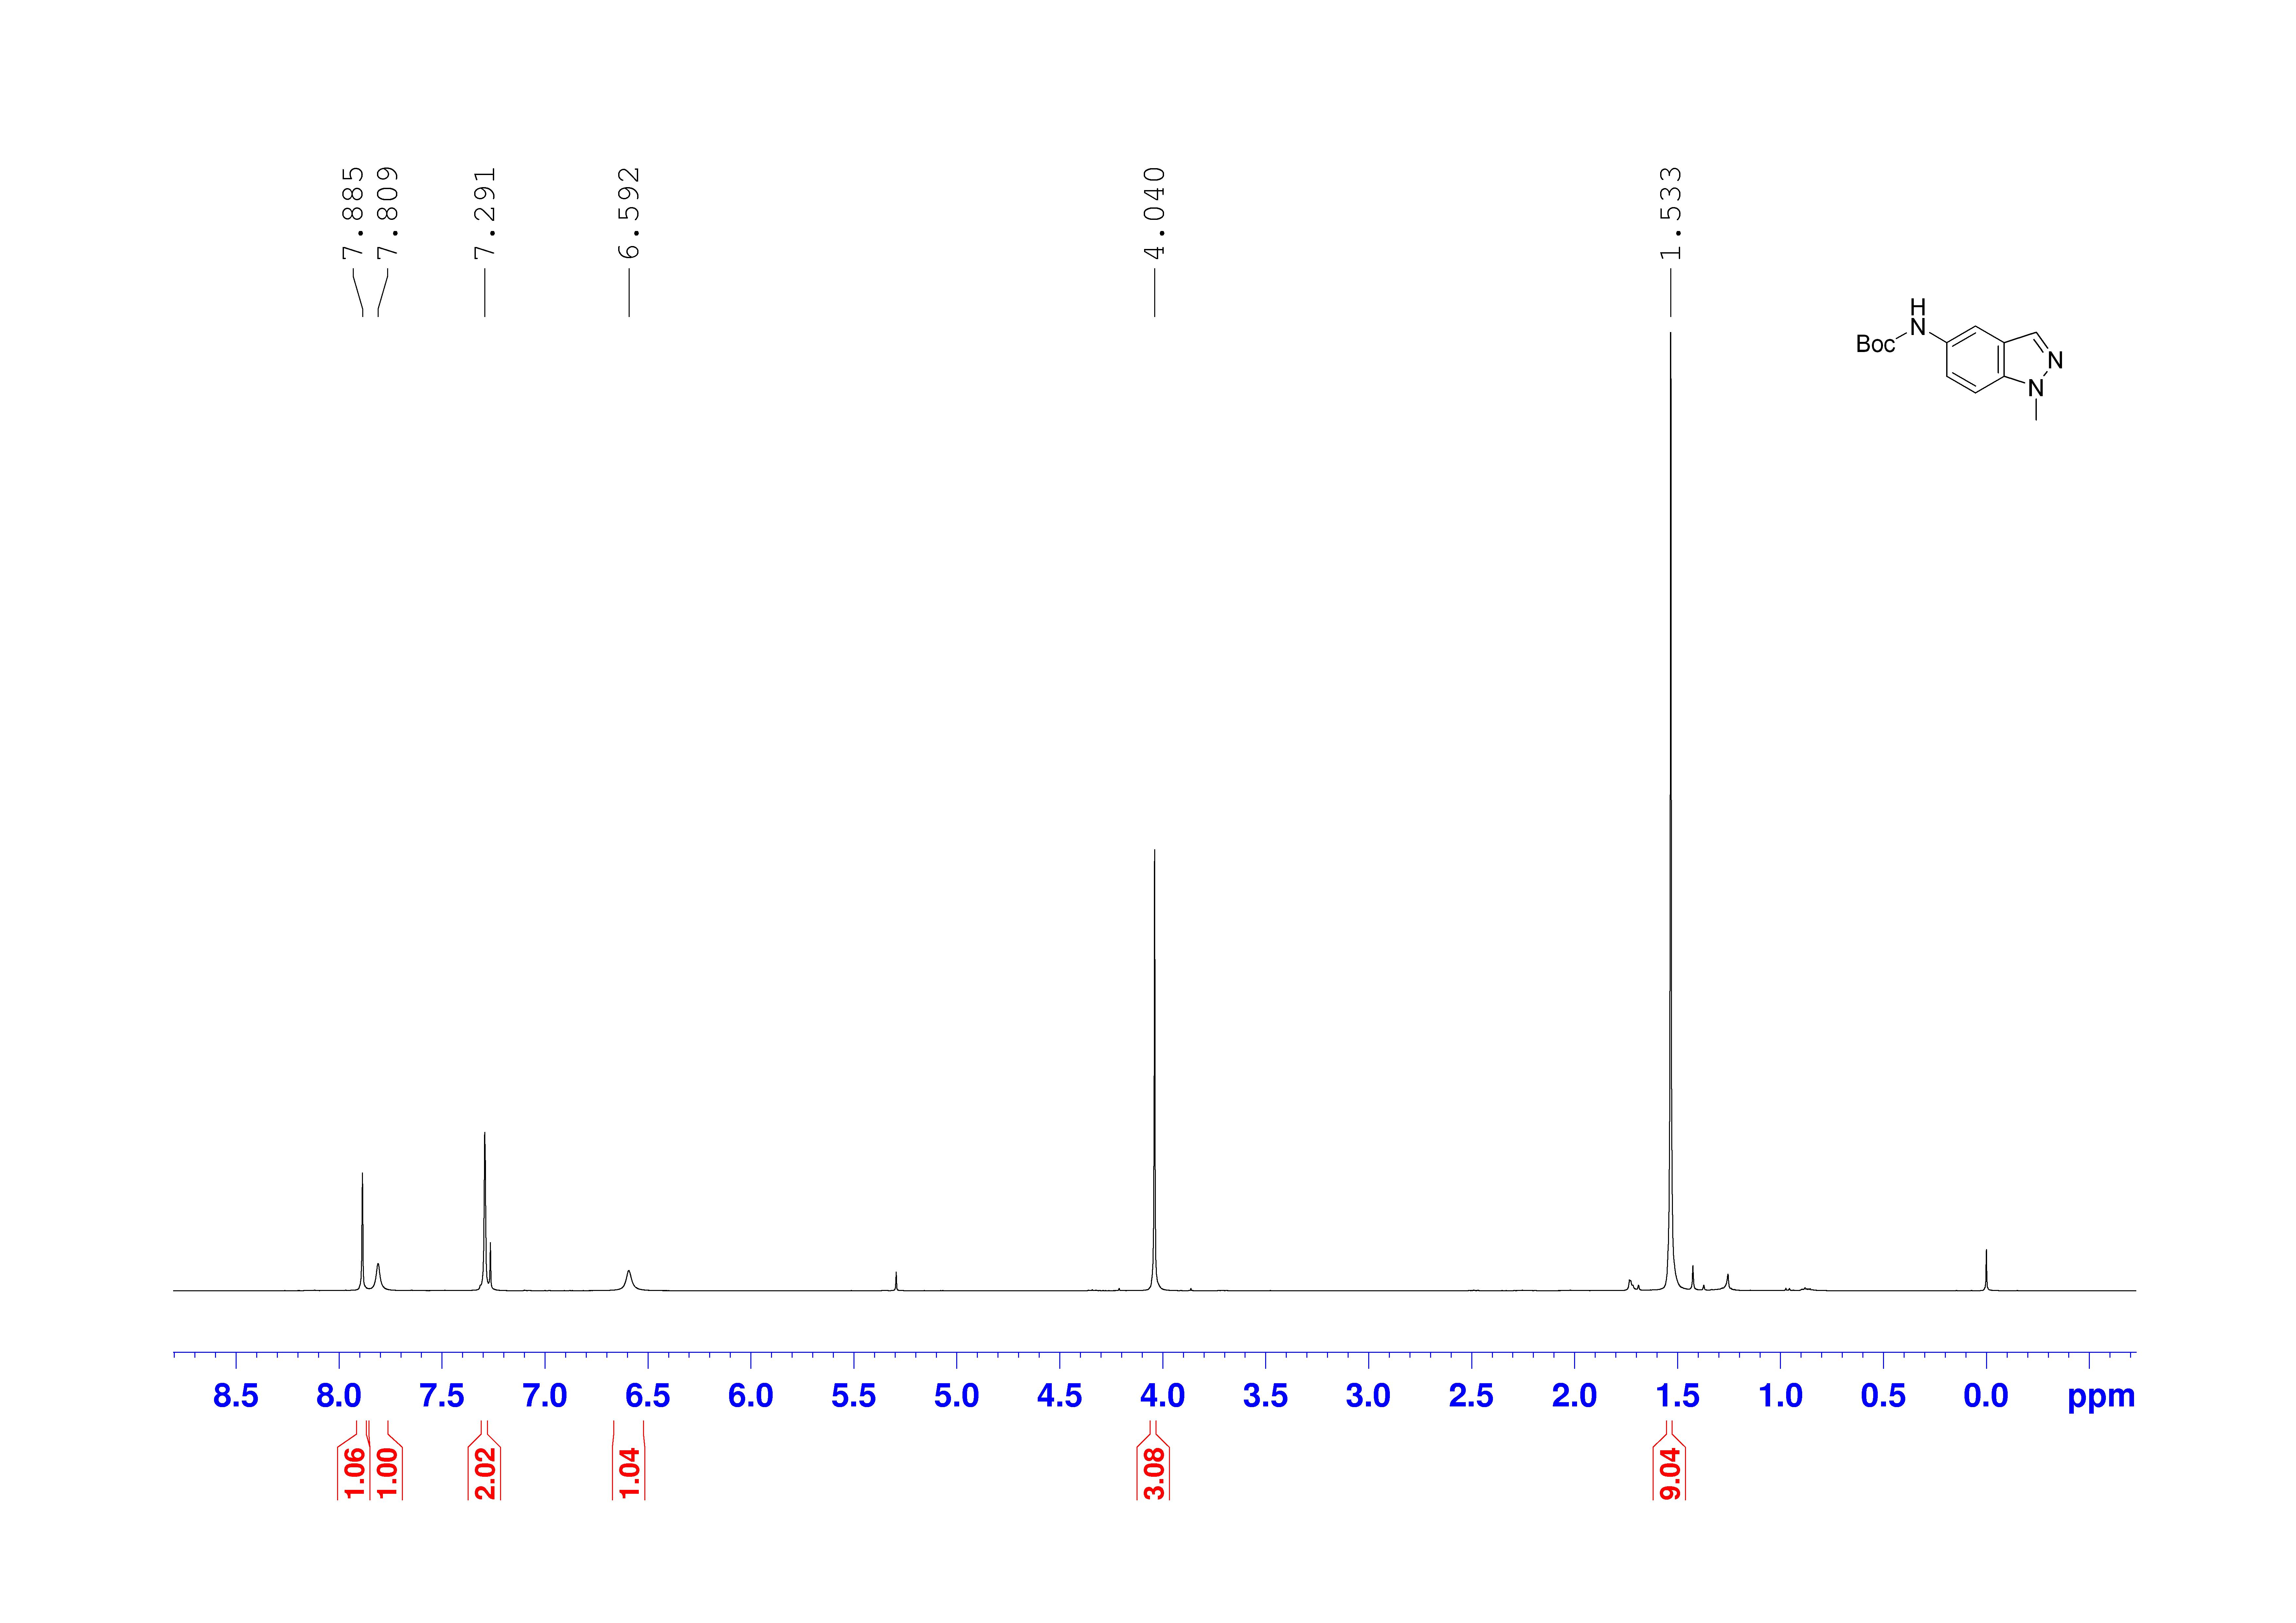


**Supplementary Fig. 50.** 1H NMR spectrum of **IN1-Boc** in CDCl3


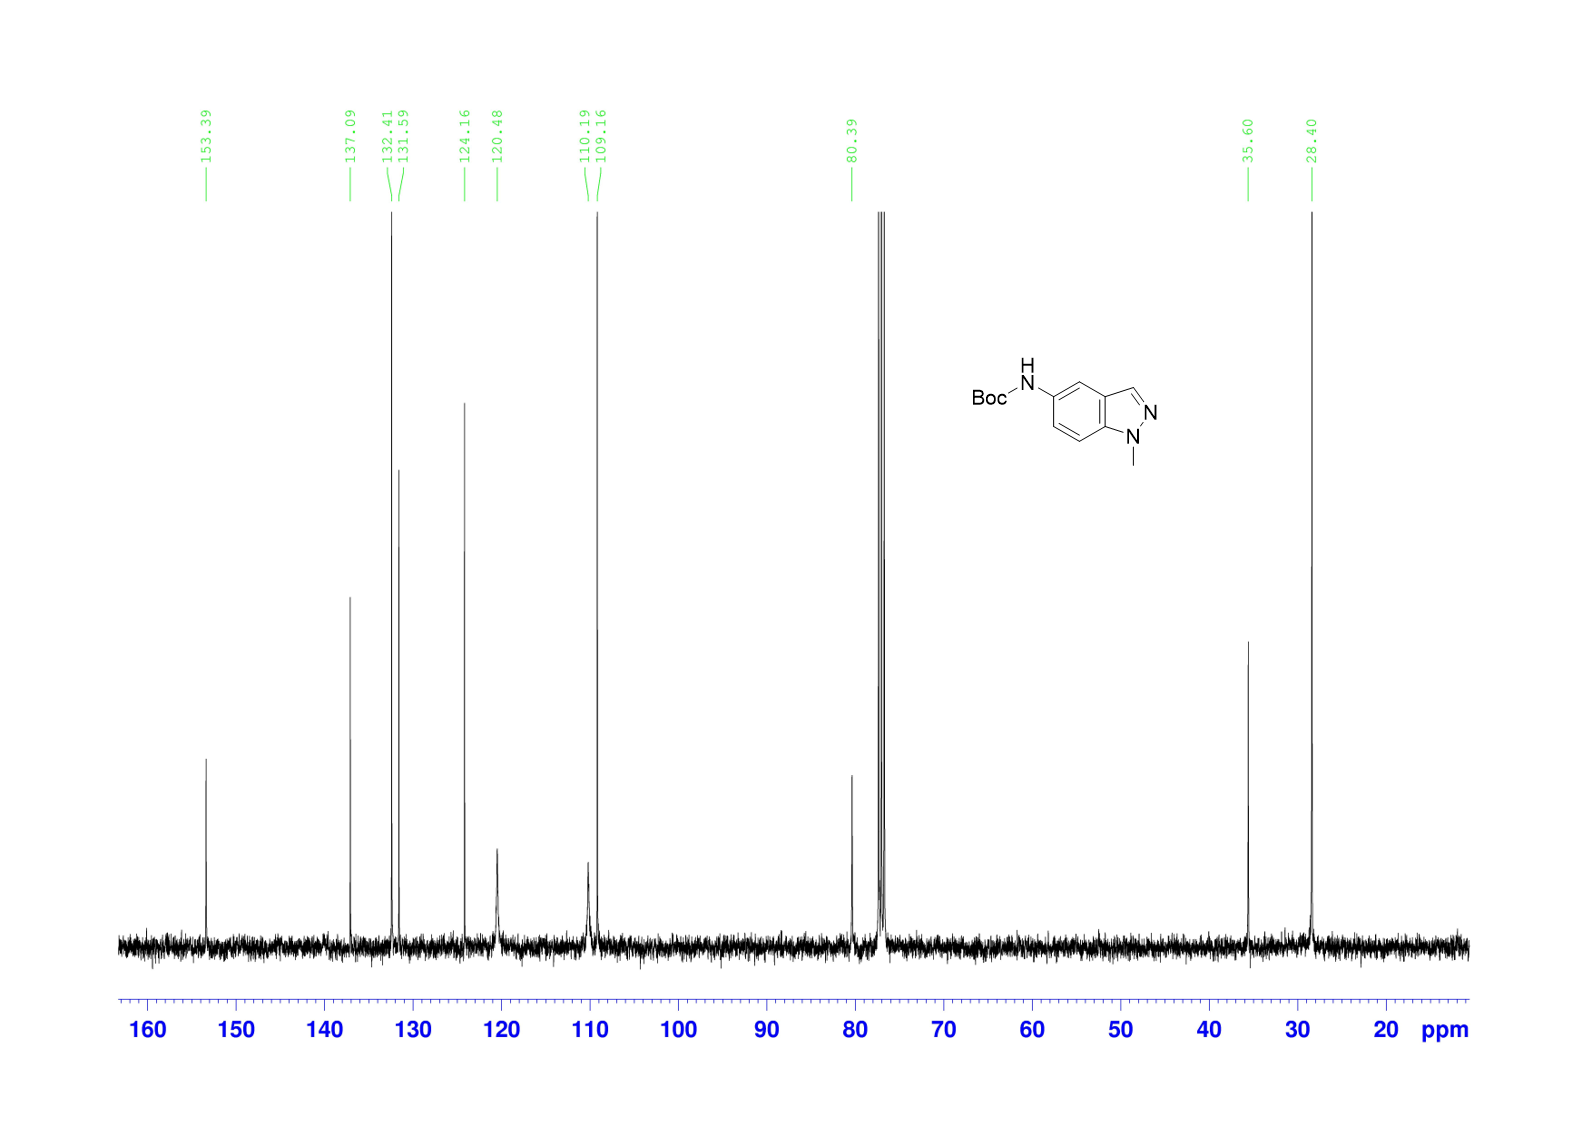


**Supplementary Fig. 51.** 13C NMR spectrum of **IN1-Boc** in CDCl3


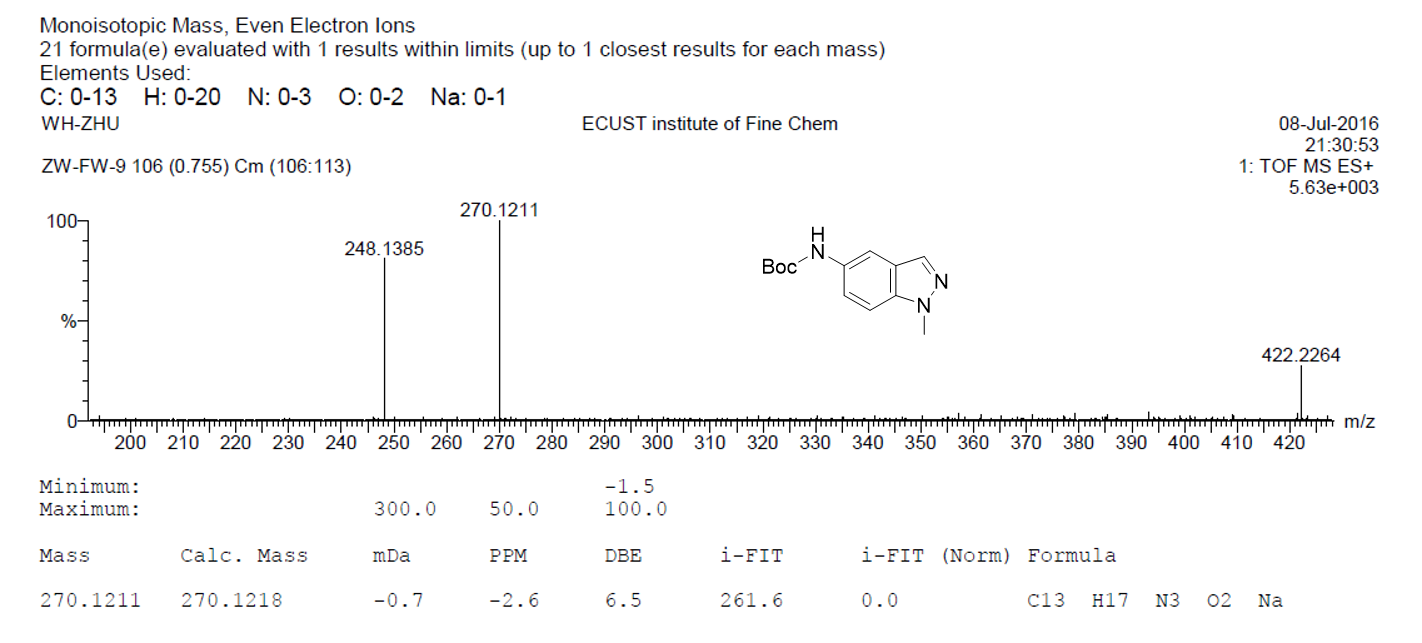


**Supplementary Fig. 52.** HRMS spectrum of **IN1-Boc**


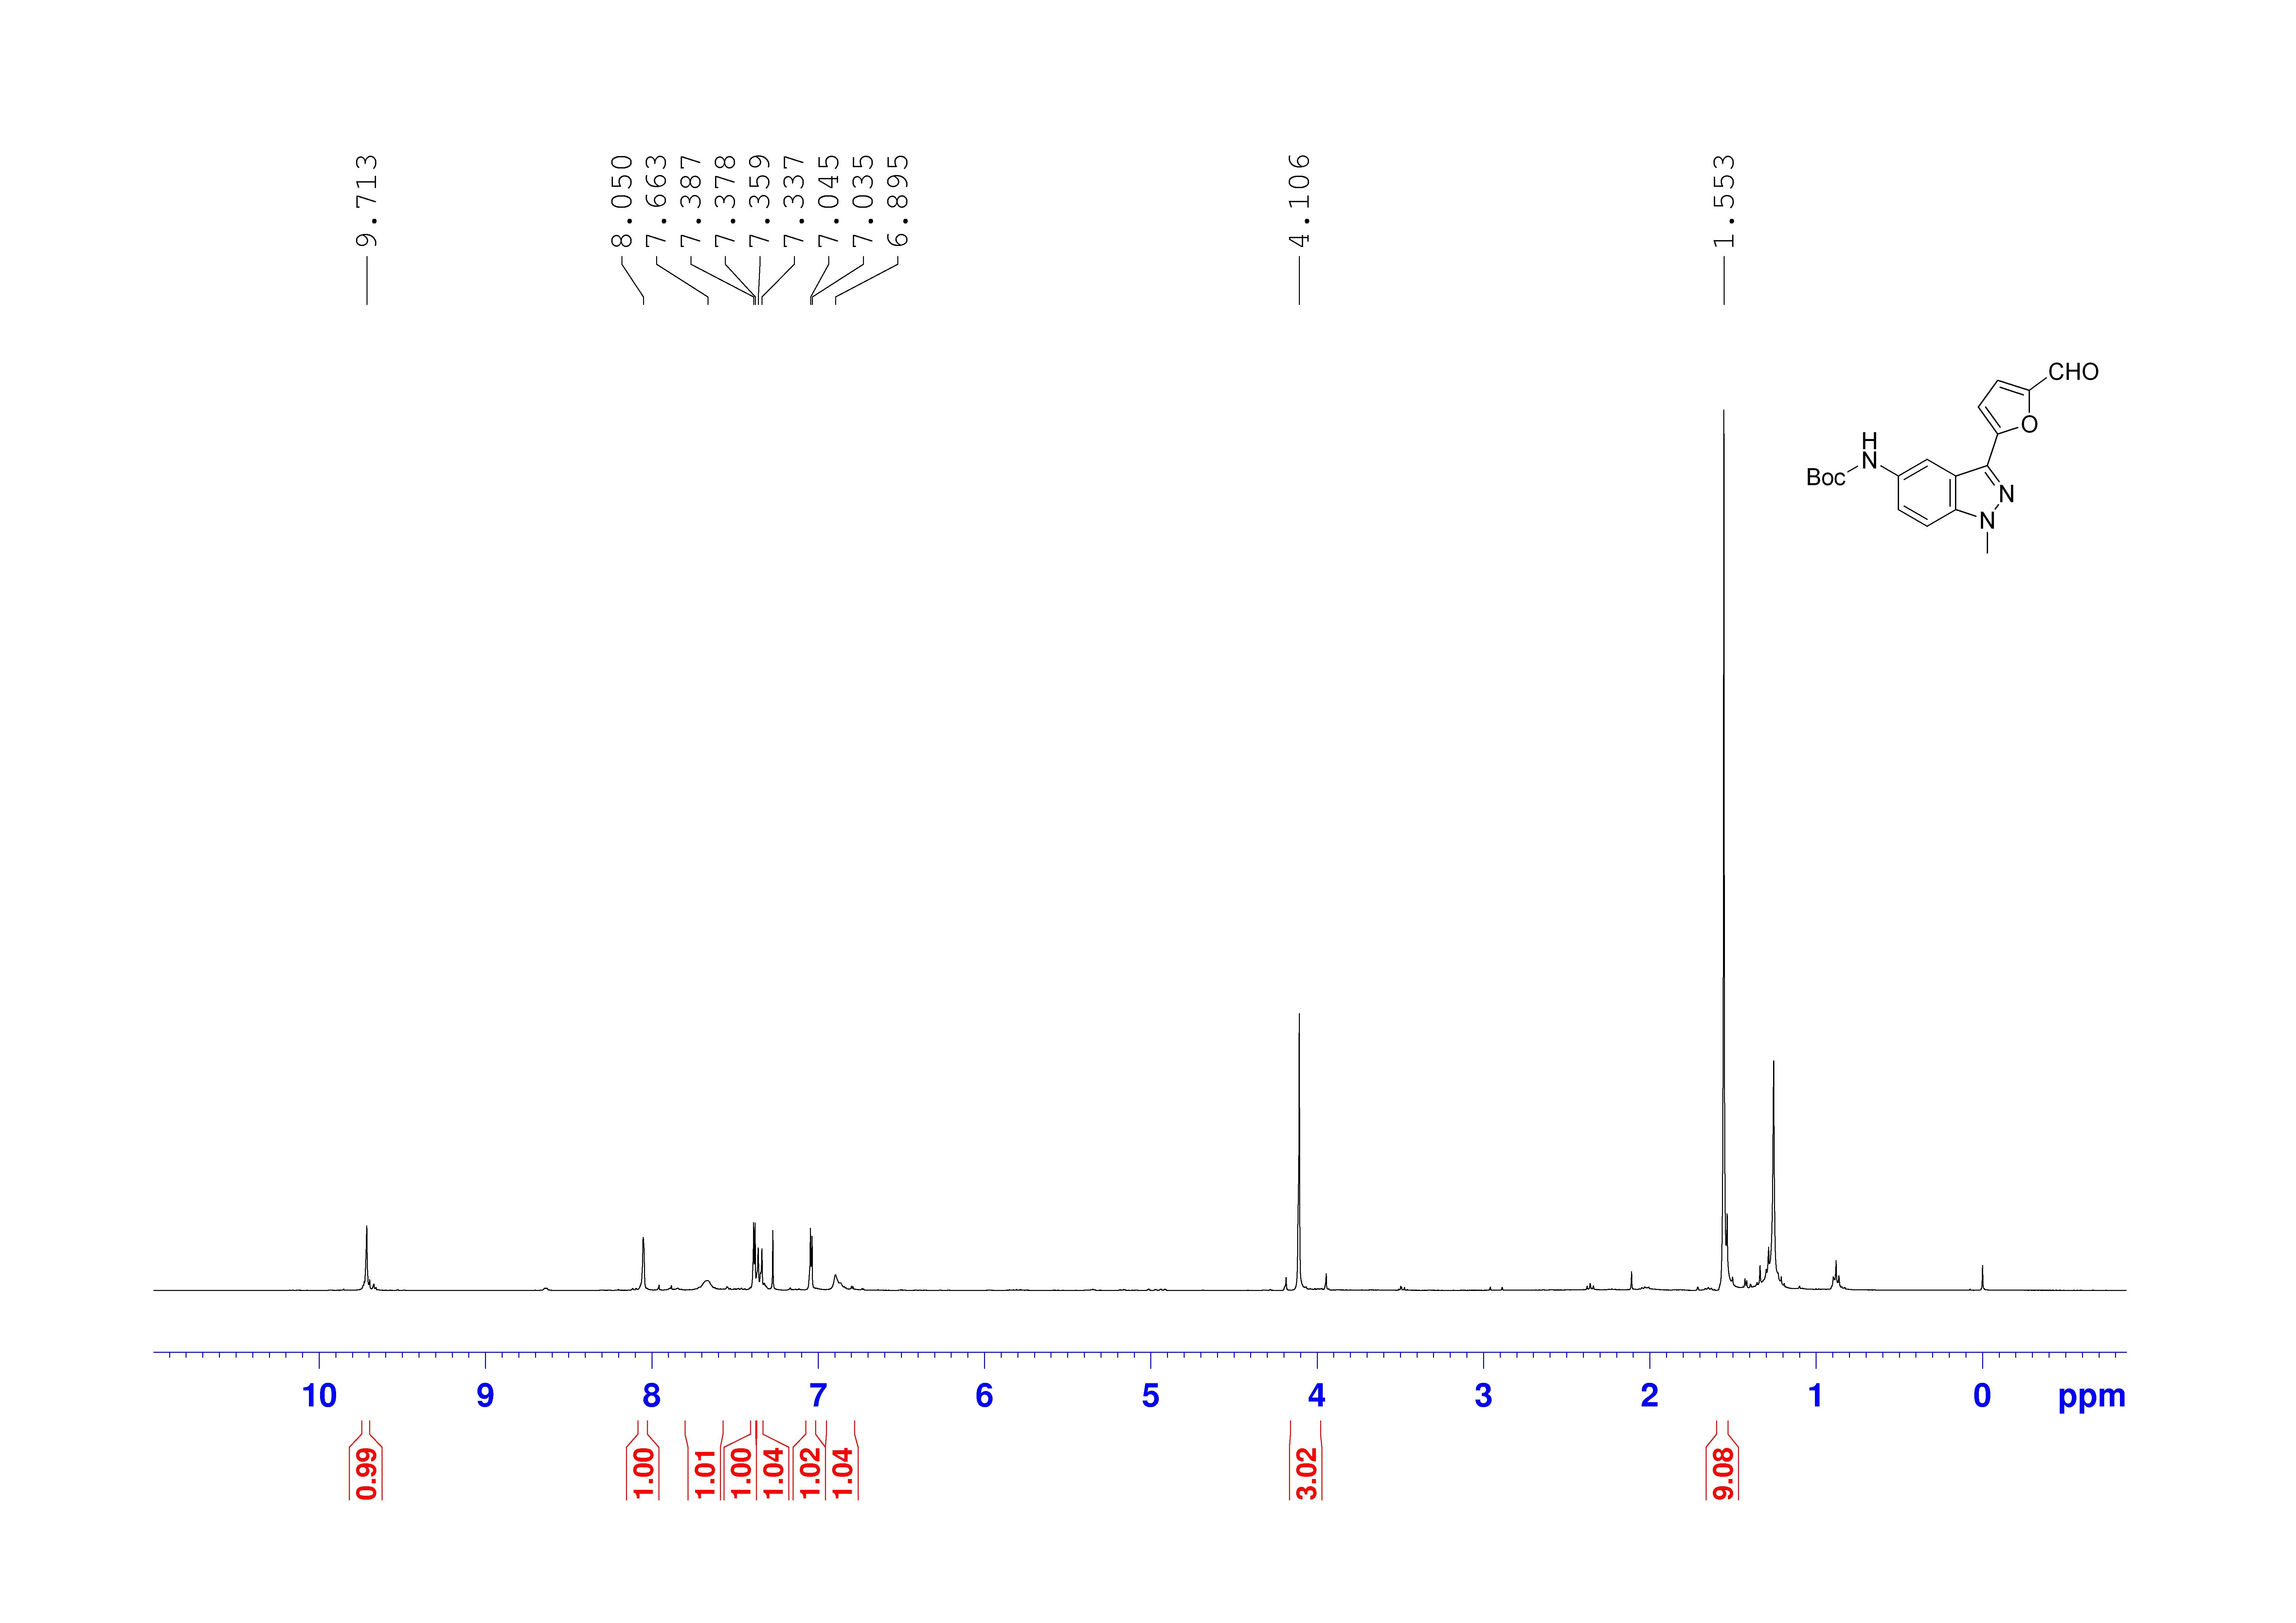


**Supplementary Fig. 53.** 1H NMR spectrum of **AL-IN1-Boc** in CDCl3


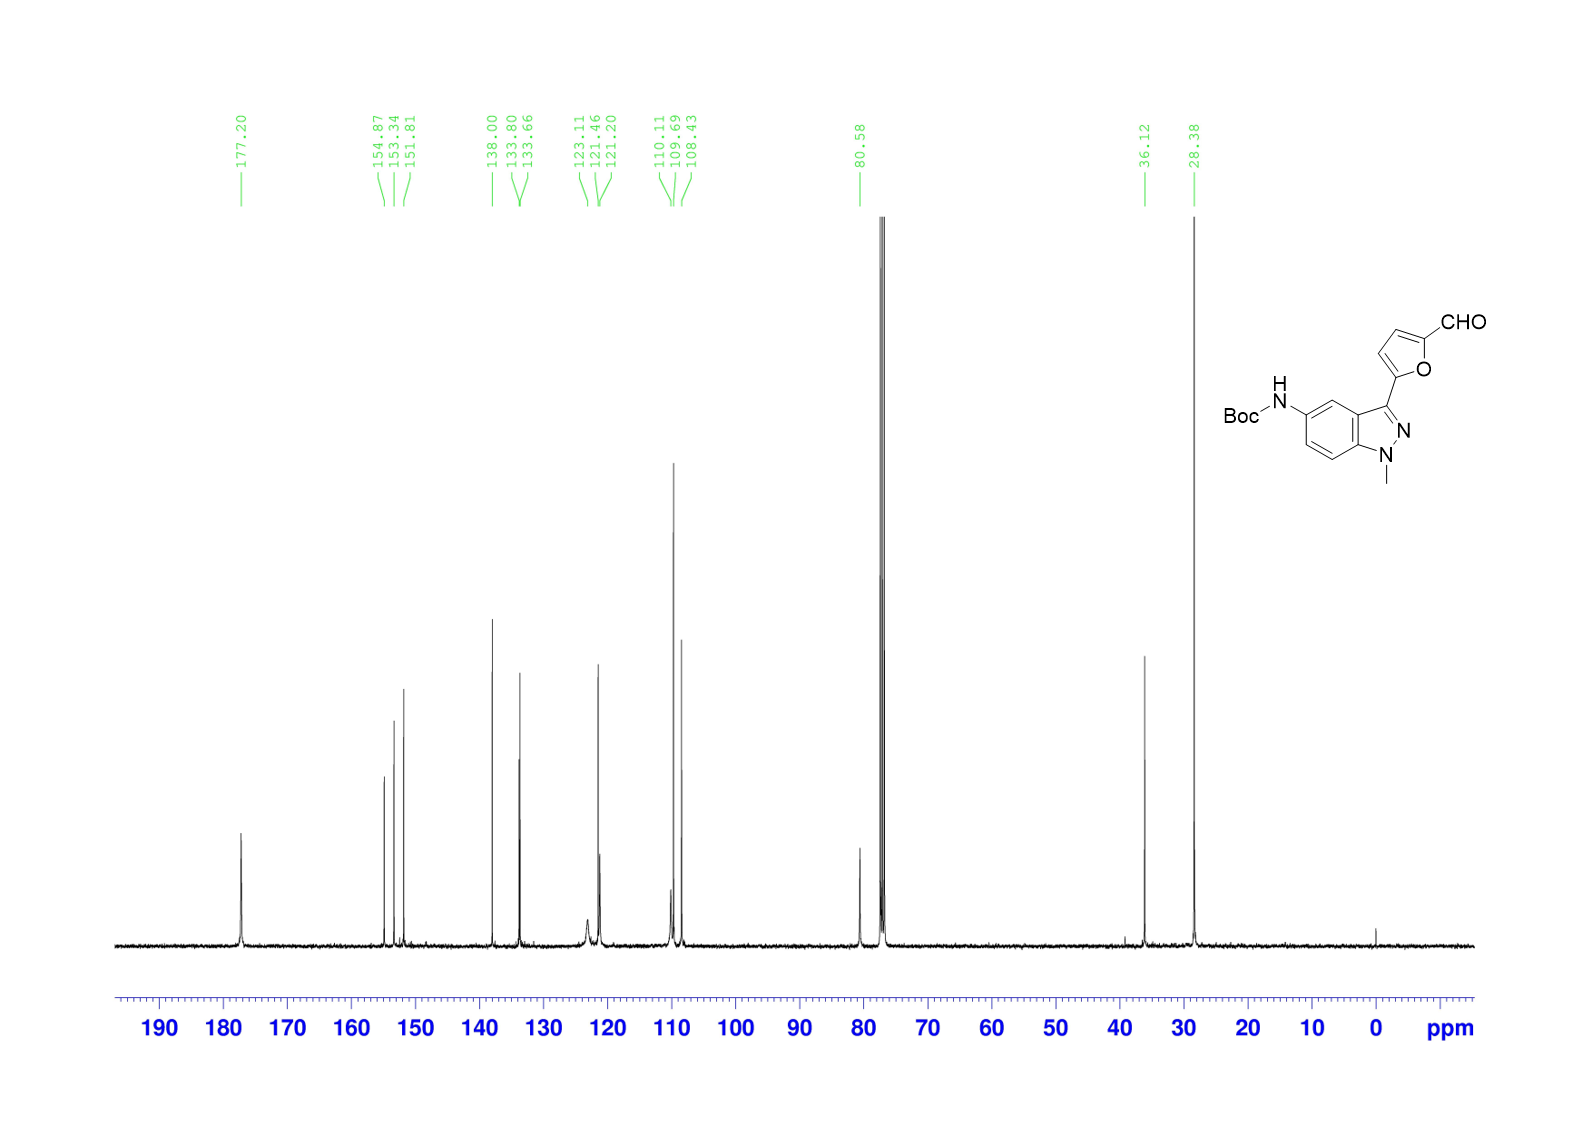


**Supplementary Fig. 54.** 13C NMR spectrum of **AL-IN1-Boc** in CDCl3


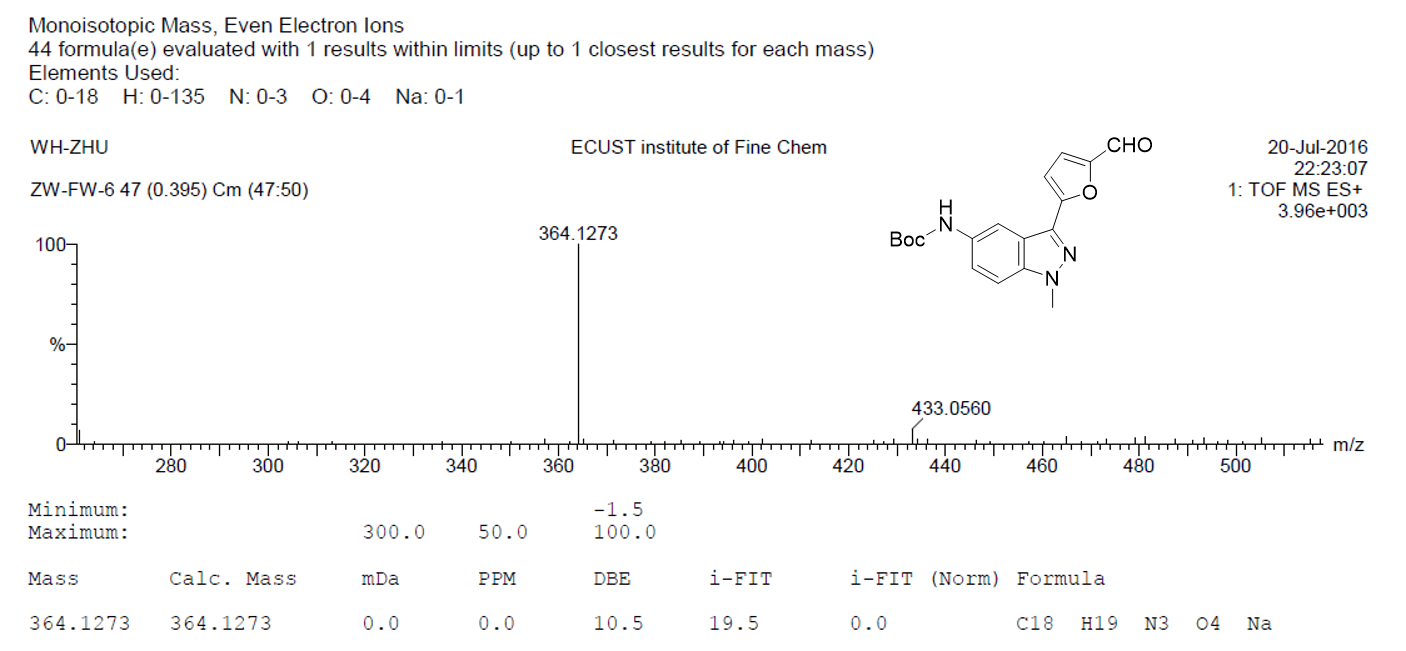


**Supplementary Fig. 55.** HRMS spectrum of **AL-IN1-Boc**


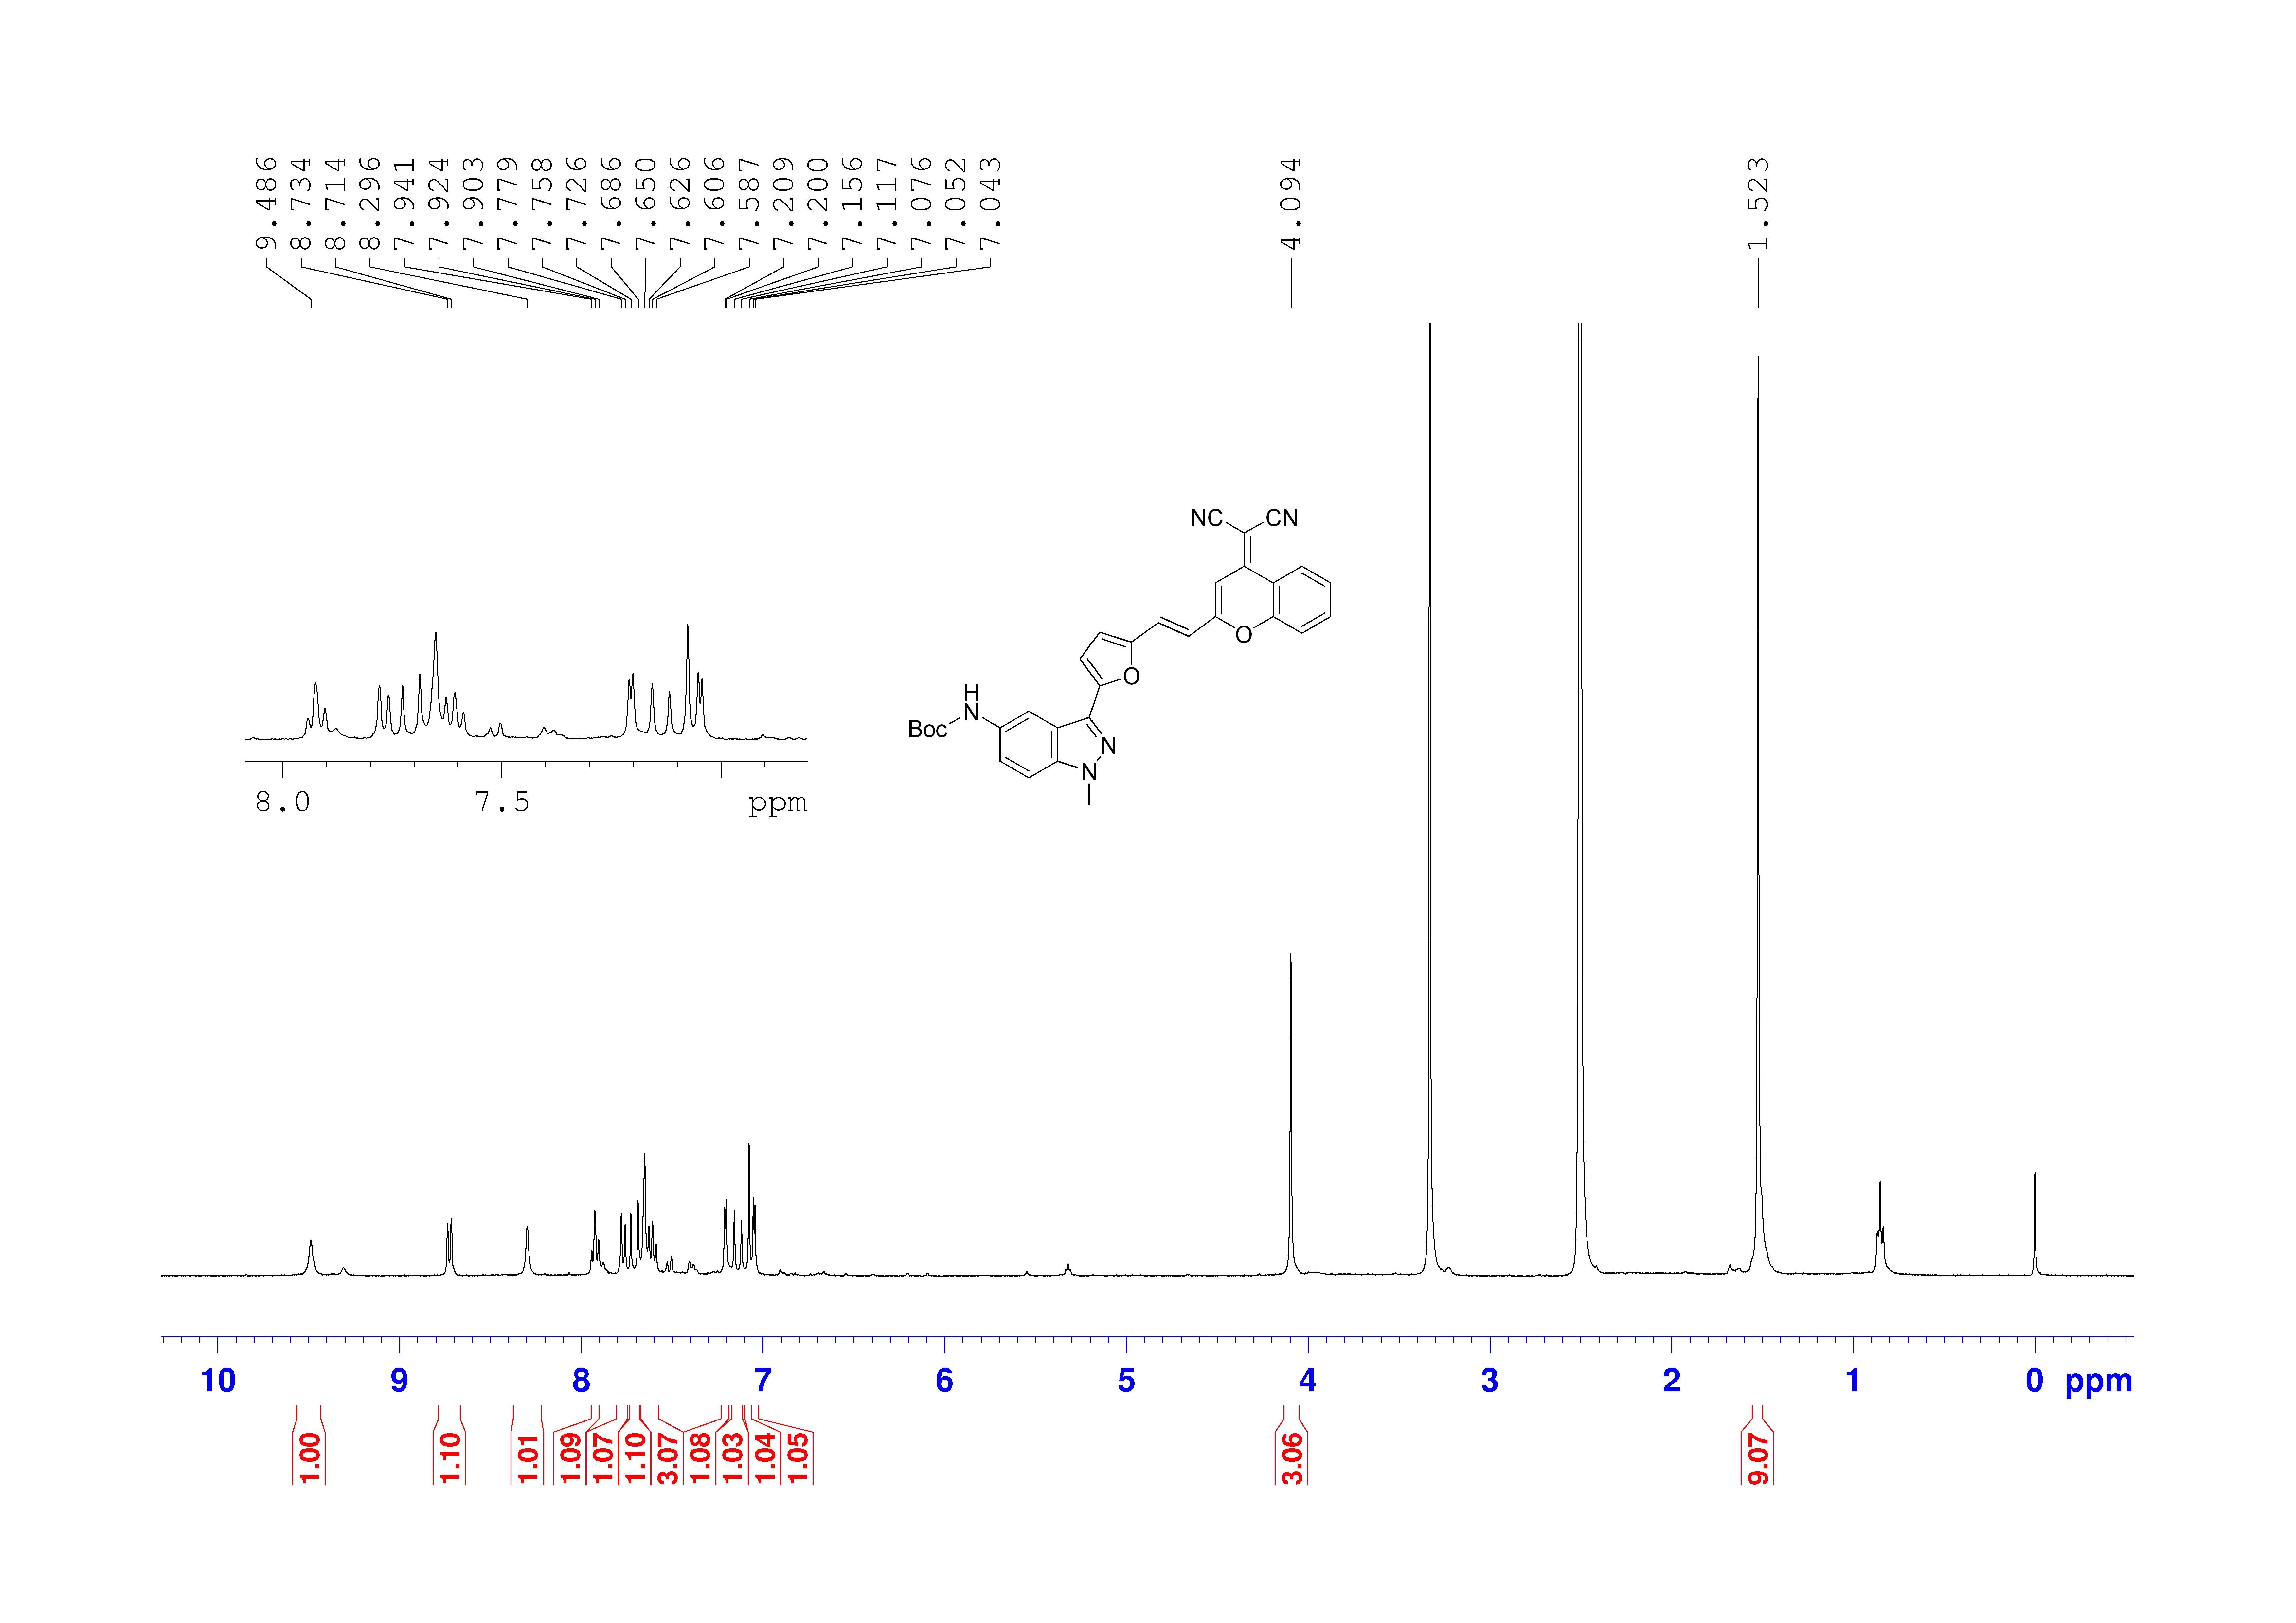


**Supplementary Fig. 56.** 1H NMR spectrum of **DCM-IN1-Boc** in DMSO-*d*6


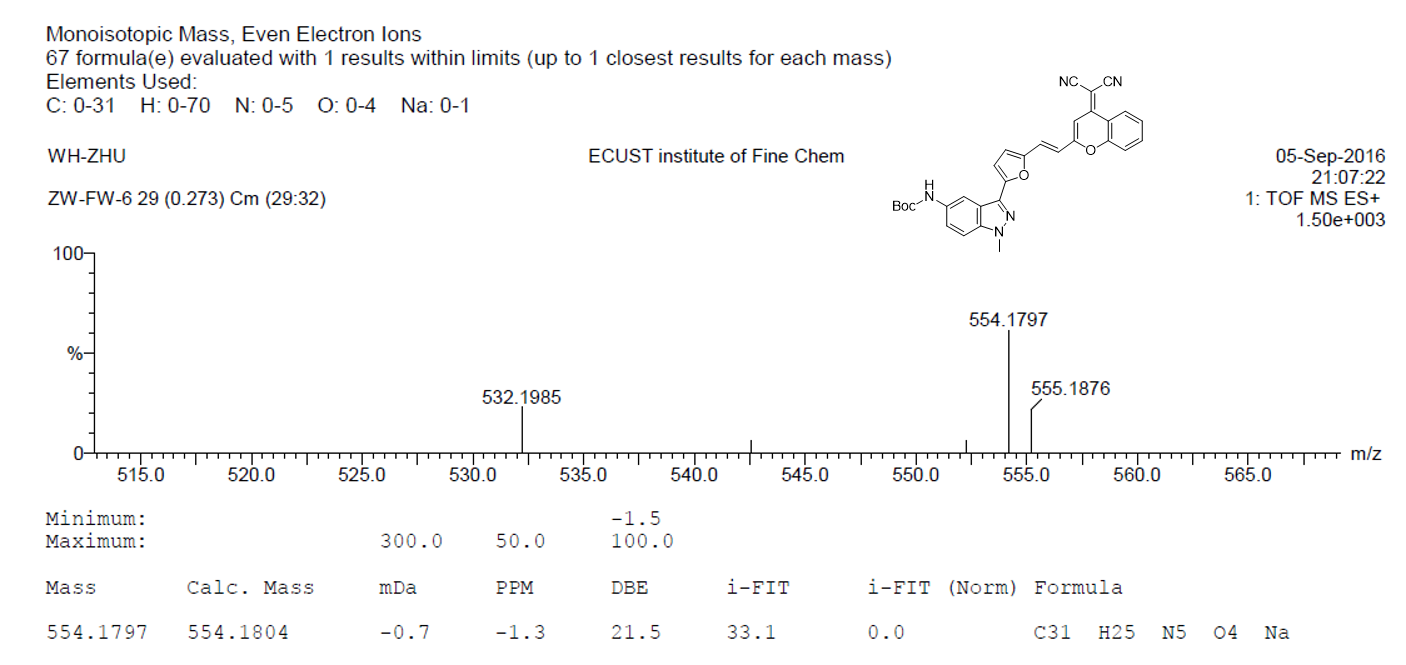


**Supplementary Fig. 57.** HRMS spectrum of **DCM-IN1-Boc**


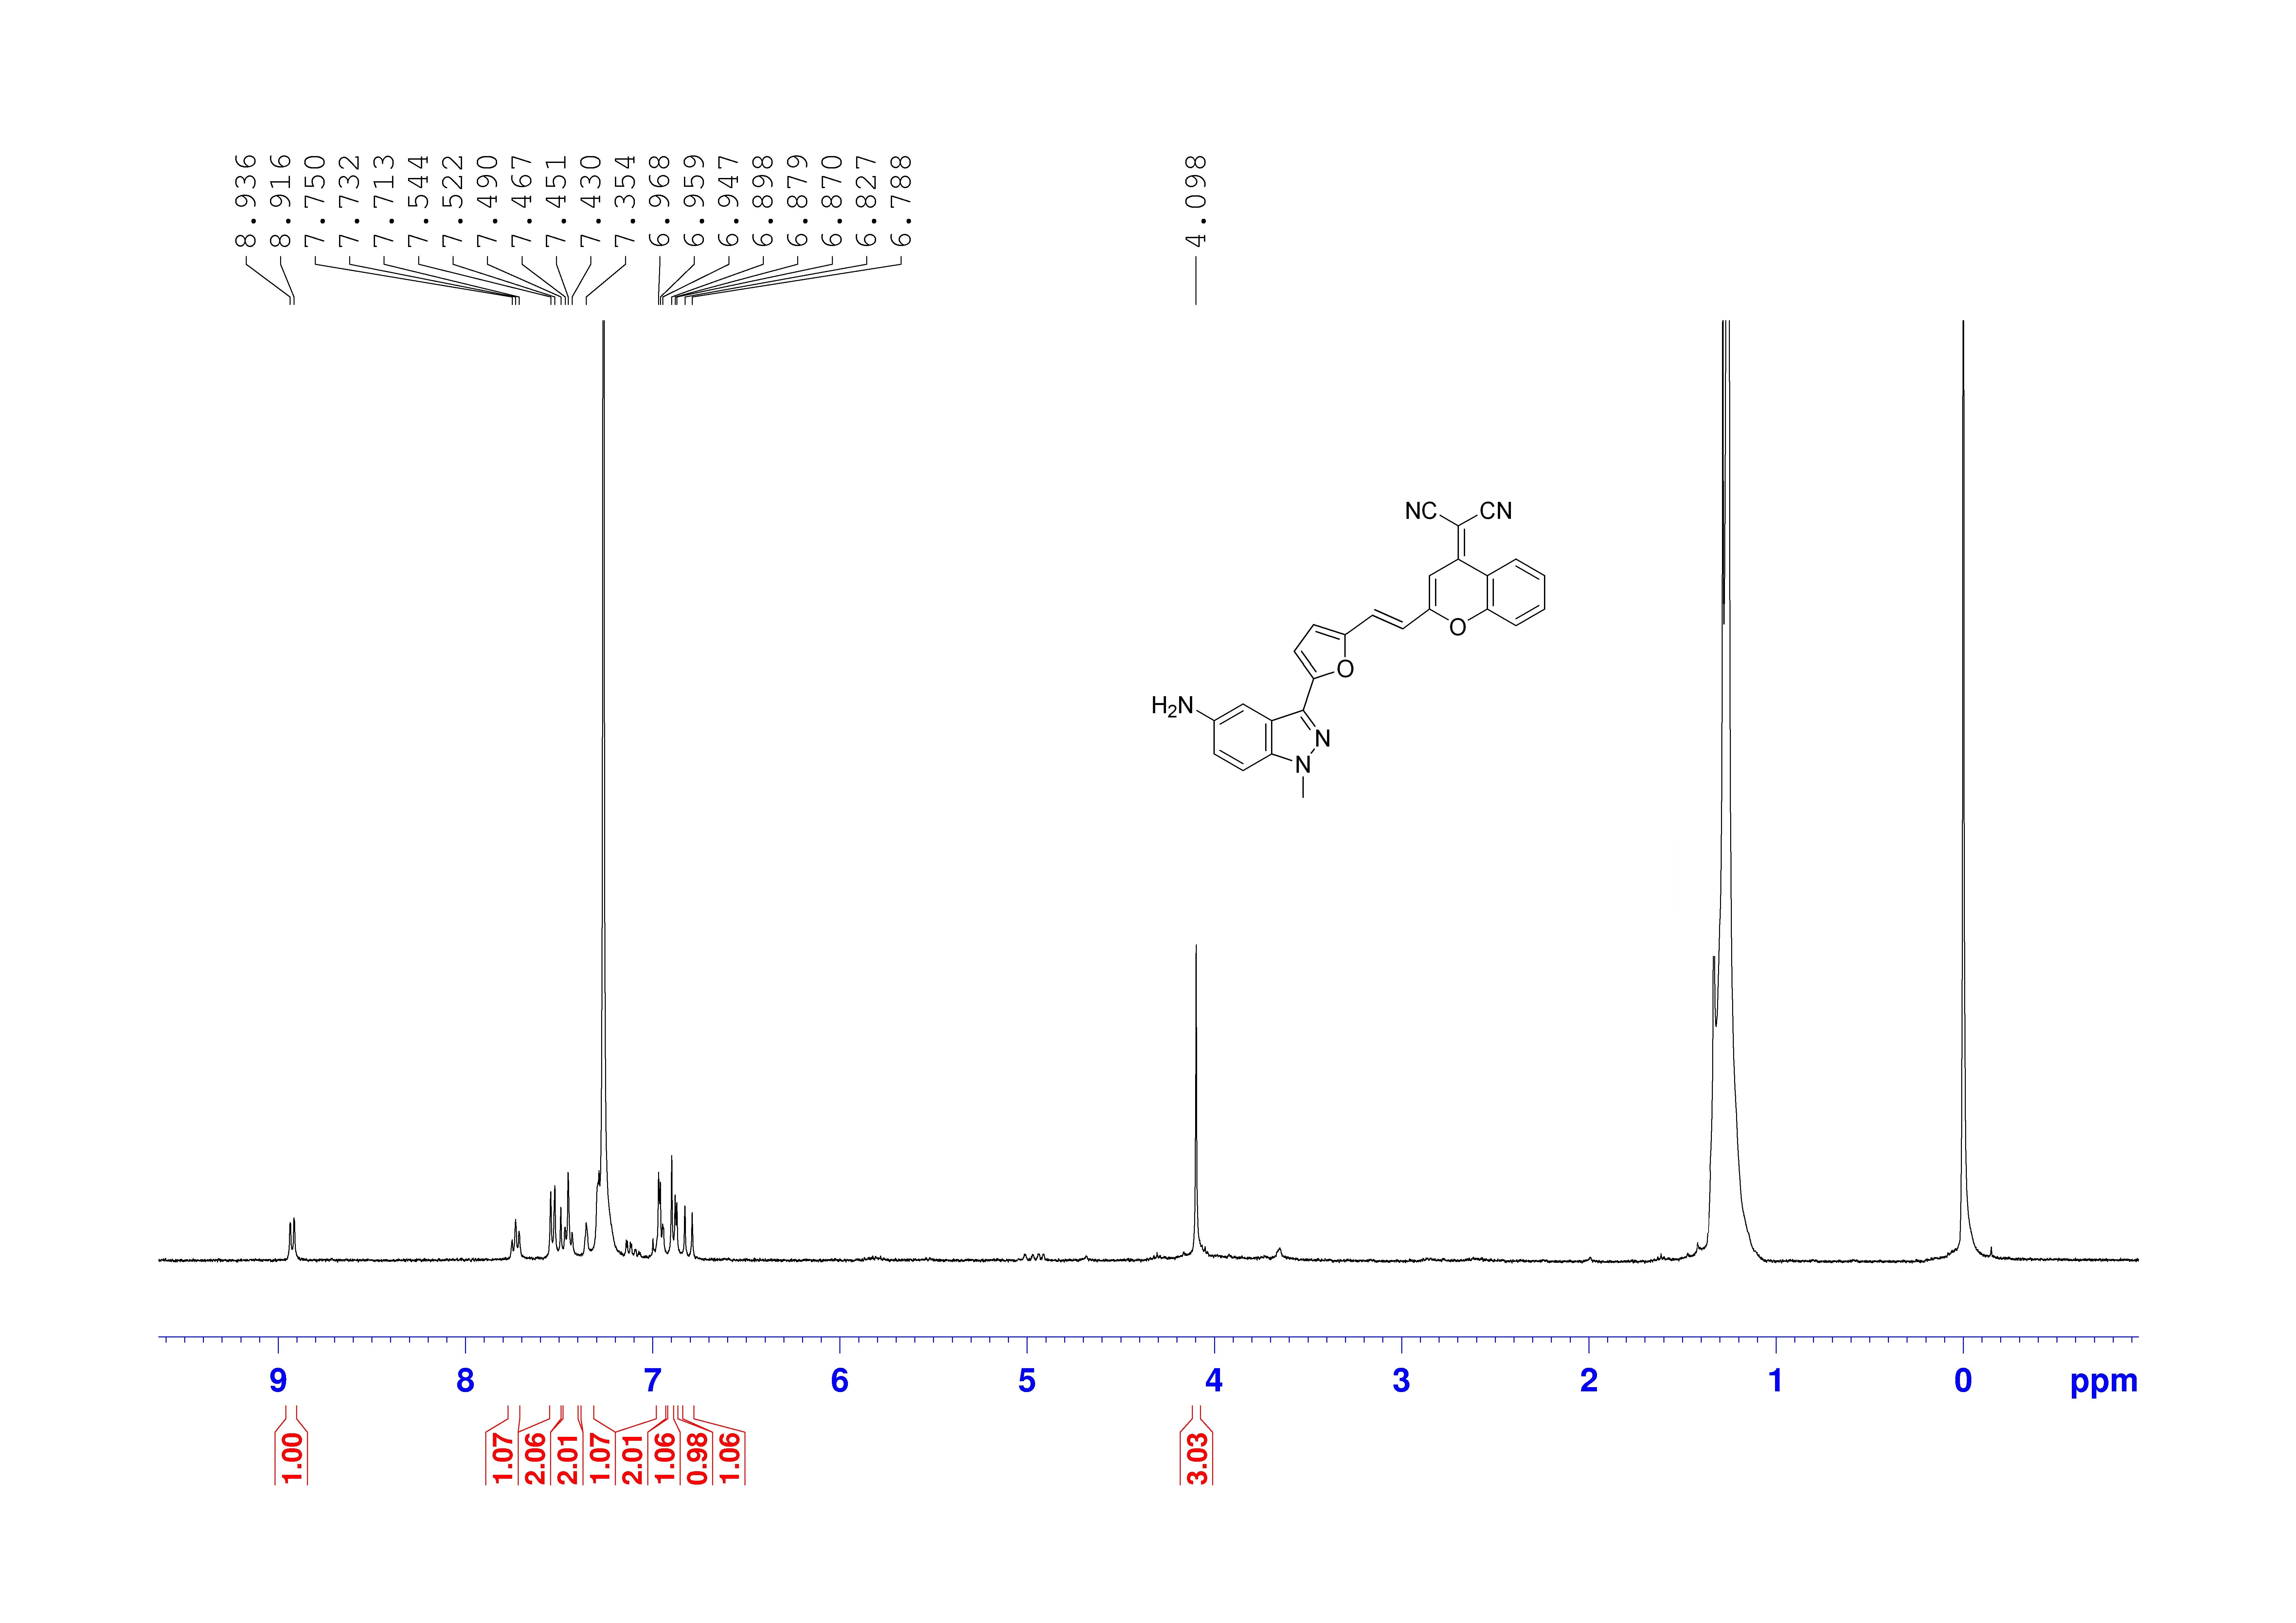


**Supplementary Fig. 58.** 1H NMR spectrum of **DCM-IN1-NH2** in CDCl3


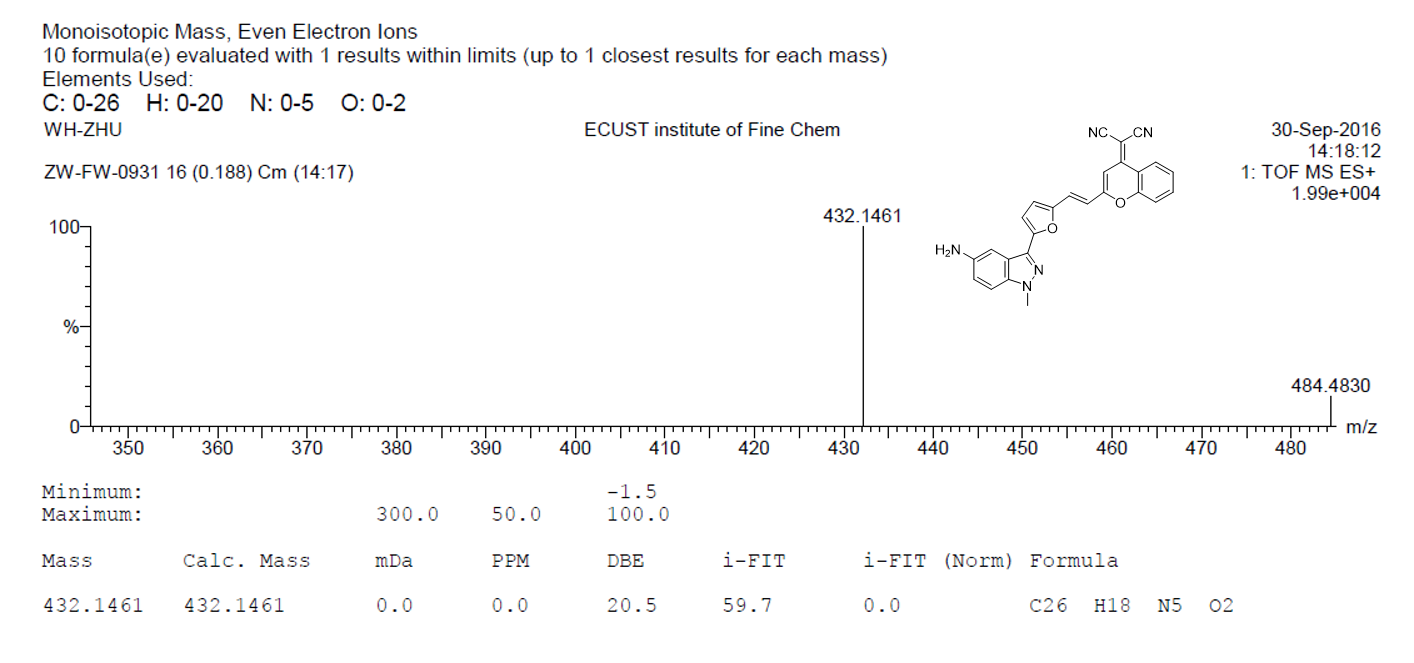


**Supplementary Fig. 59.** HRMS spectrum of **DCM-IN1-NH2**
